# Supplementary material for: Antioxidants as Molecular Probes: Structurally Novel Dihydro-m-Terphenyls as Turn-On Fluorescence Chemodosimeters for Biologically Relevant Oxidants
Source: PubMed Central journal article supplement (PMC7402136; doi:10.3390/antiox9070605), 2020-07-10
Supplement: antioxidants-09-00605-s001.pdf [file antioxidants-09-00605-s001.pdf]

## *Supplementary materials*

# **Antioxidants as molecular probes: Structurally novel dihydro-*m*-terphenyls as turn-on fluorescence chemodosimeters for biologically relevant oxidants**

**Víctor González-Ruiz,<sup>1,†</sup> Jegathalaprathaban Rajesh,<sup>1,‡</sup> Ana I. Olives,<sup>1</sup> Damiano Rocchi,<sup>2</sup> Jorge Gómez-Carpintero,<sup>2</sup> Juan F. González,<sup>2</sup> Vellaisamy Sridharan,<sup>3</sup> M. Antonia Martín<sup>1,\*</sup> and J. Carlos Menéndez<sup>2,\*</sup>**

<sup>1</sup> Unidad de Química Analítica, Departamento de Química en Ciencias Farmacéuticas. Facultad de Farmacia, Universidad Complutense, 28040 Madrid, Spain; aiolives@ucm.es, mantonia@ucm.es

<sup>2</sup> Unidad de Química Orgánica y Farmacéutica, Departamento de Química en Ciencias Farmacéuticas. Facultad de Farmacia, Universidad Complutense, 28040 Madrid, Spain; jgomez21892@gmail.com; rocchid83@gmail.com; jfgonzalez@ucm.es, josecm@ucm.es

<sup>3</sup> Department of Chemistry and Chemical Sciences, Central University of Jammu. Rahya-Suchani (Bagla), District-Samba, Jammu-181143, J&K, India; vesridharan@gmail.com.

<sup>‡</sup> Present address: Department of Chemistry, Sethu Institute of Technology. Pullor, Kariapatti - 626 115 Virudhunagar (D.T), Tamil Nadu, India; mkuraji@gmail.com.

<sup>†</sup> Present address: Analytical Sciences, School of Pharmaceutical Sciences and Institute of Pharmaceutical Sciences of Western Switzerland, University of Geneva, 1 rue Michel-Servet, 1205 Geneva, Switzerland; victor.gonzalez@unige.ch. ORCID: 0000-0001-7204-2363.

\* Correspondence: mantonia@ucm.es (MAM) and josecm@ucm.es (JCM).

# 1. Copies of NMR spectra

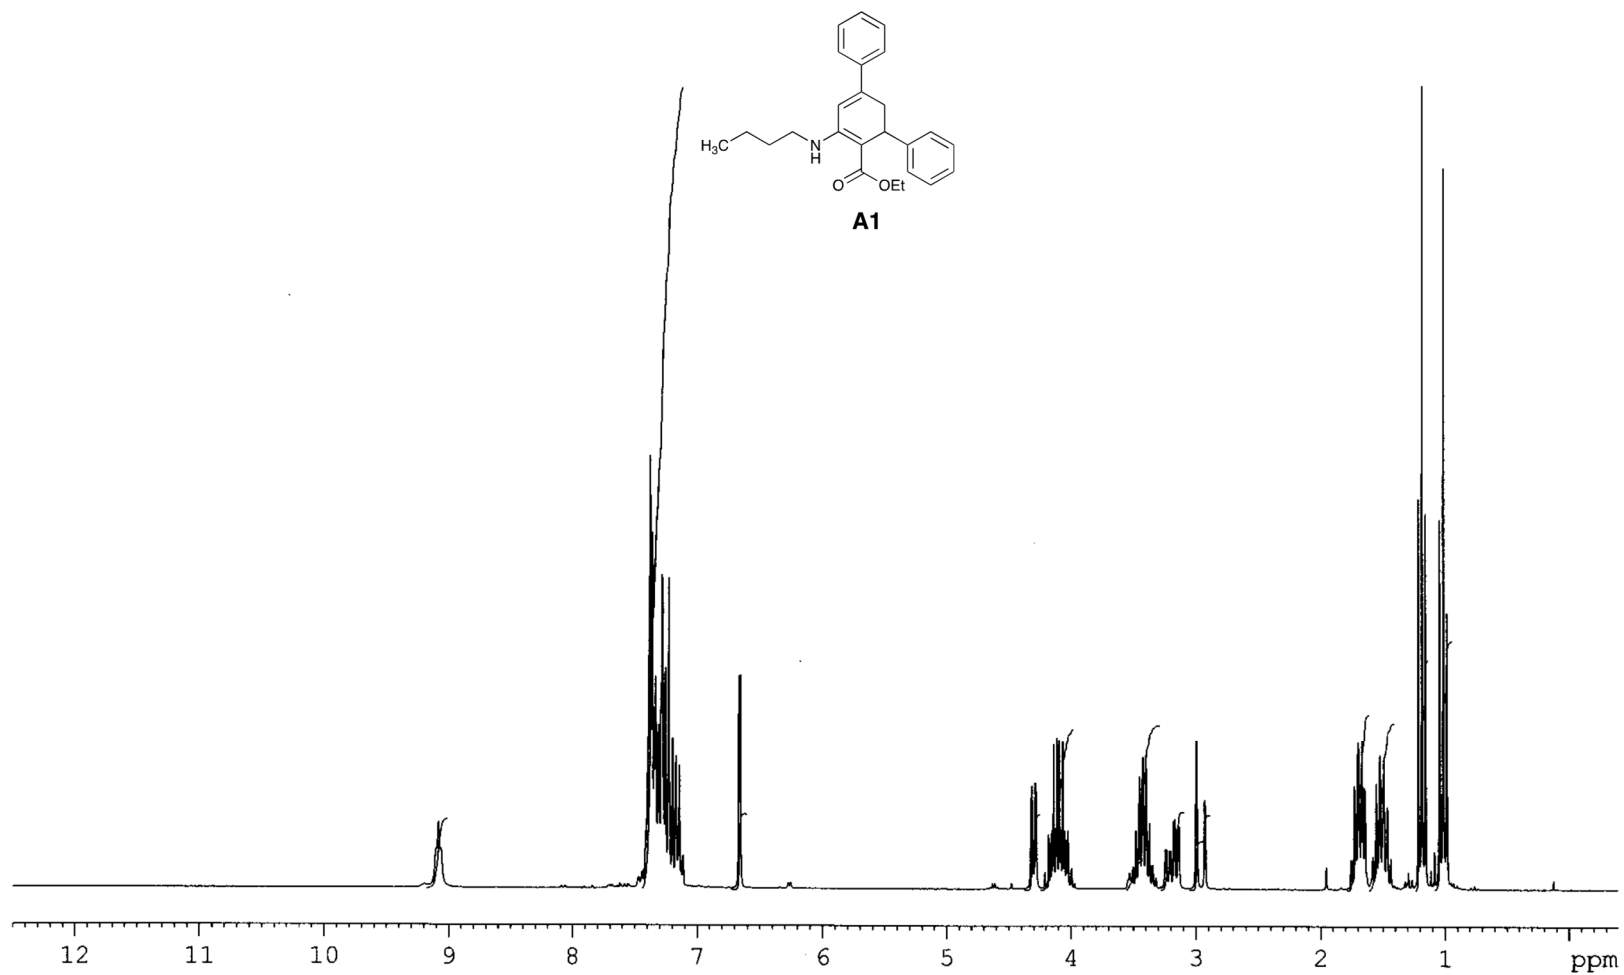

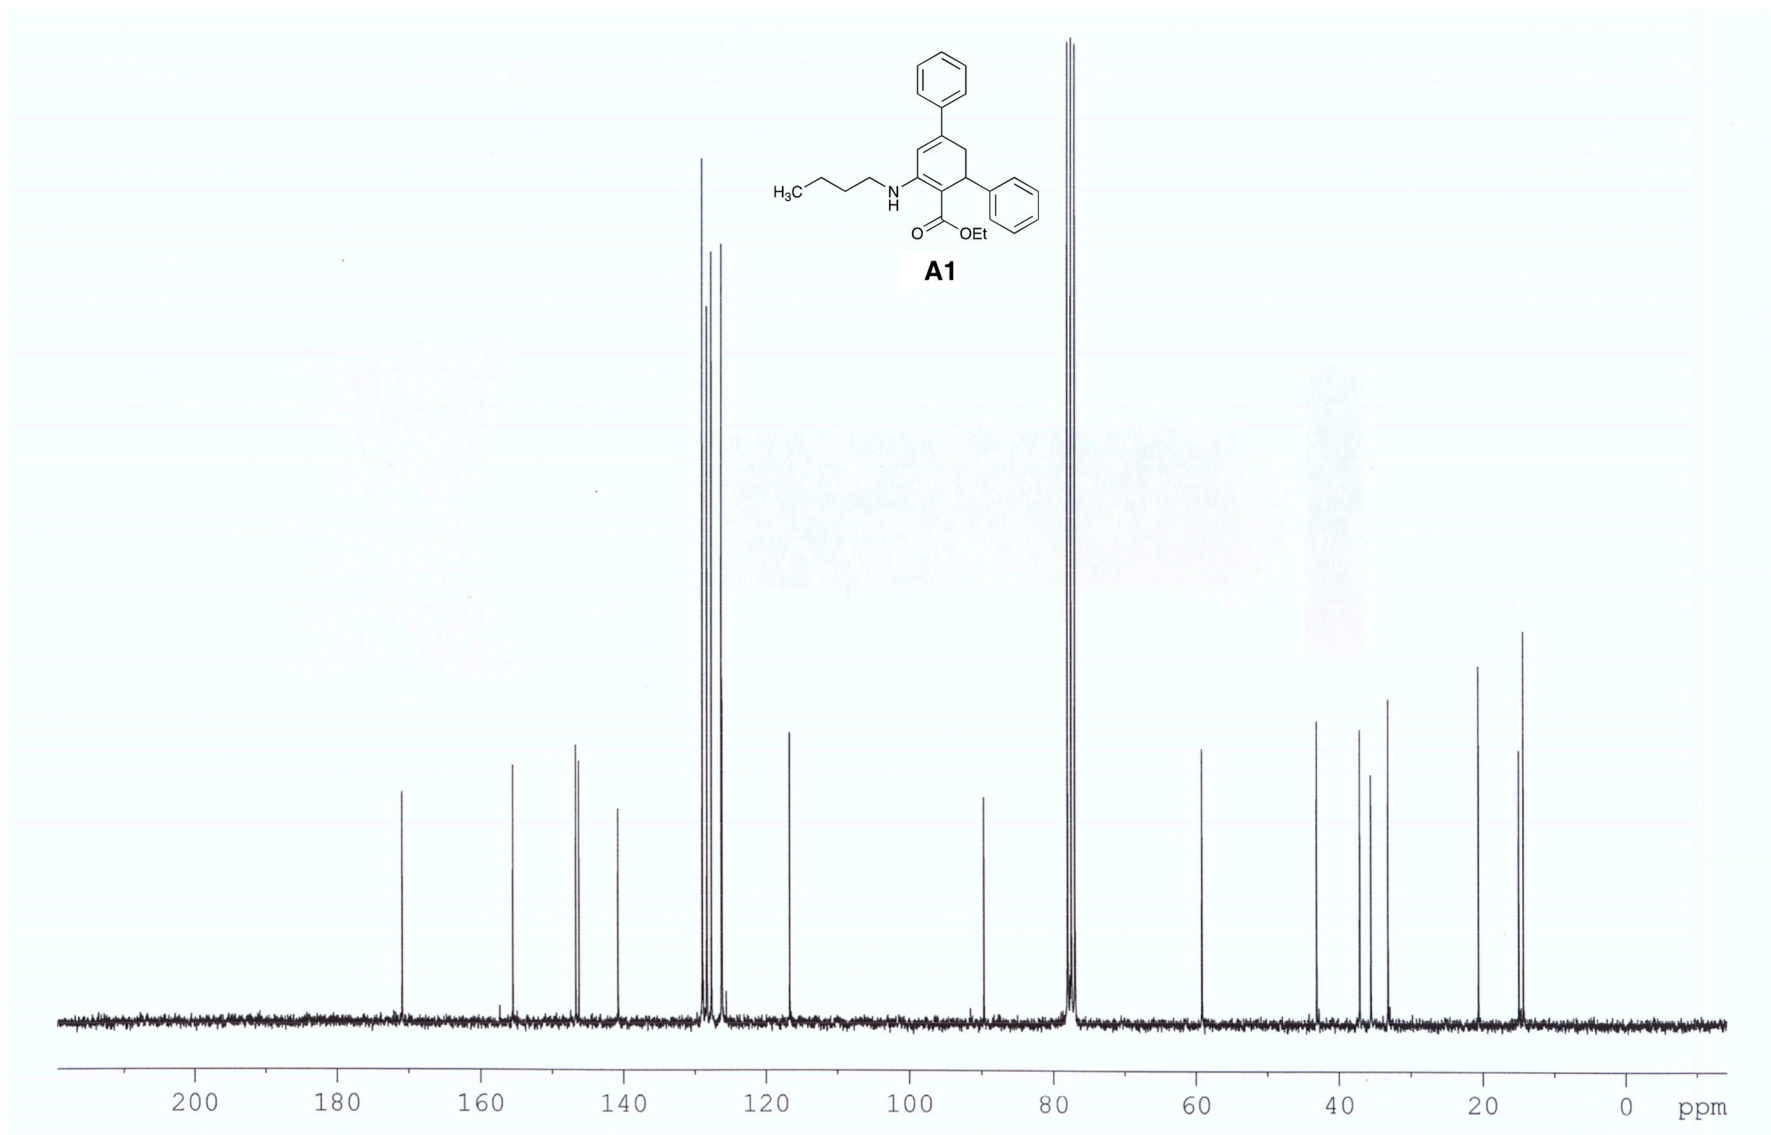

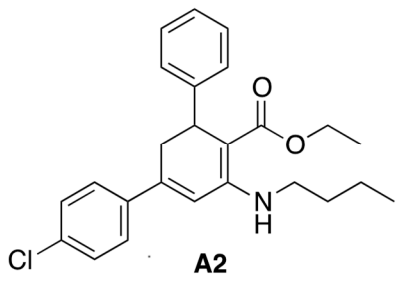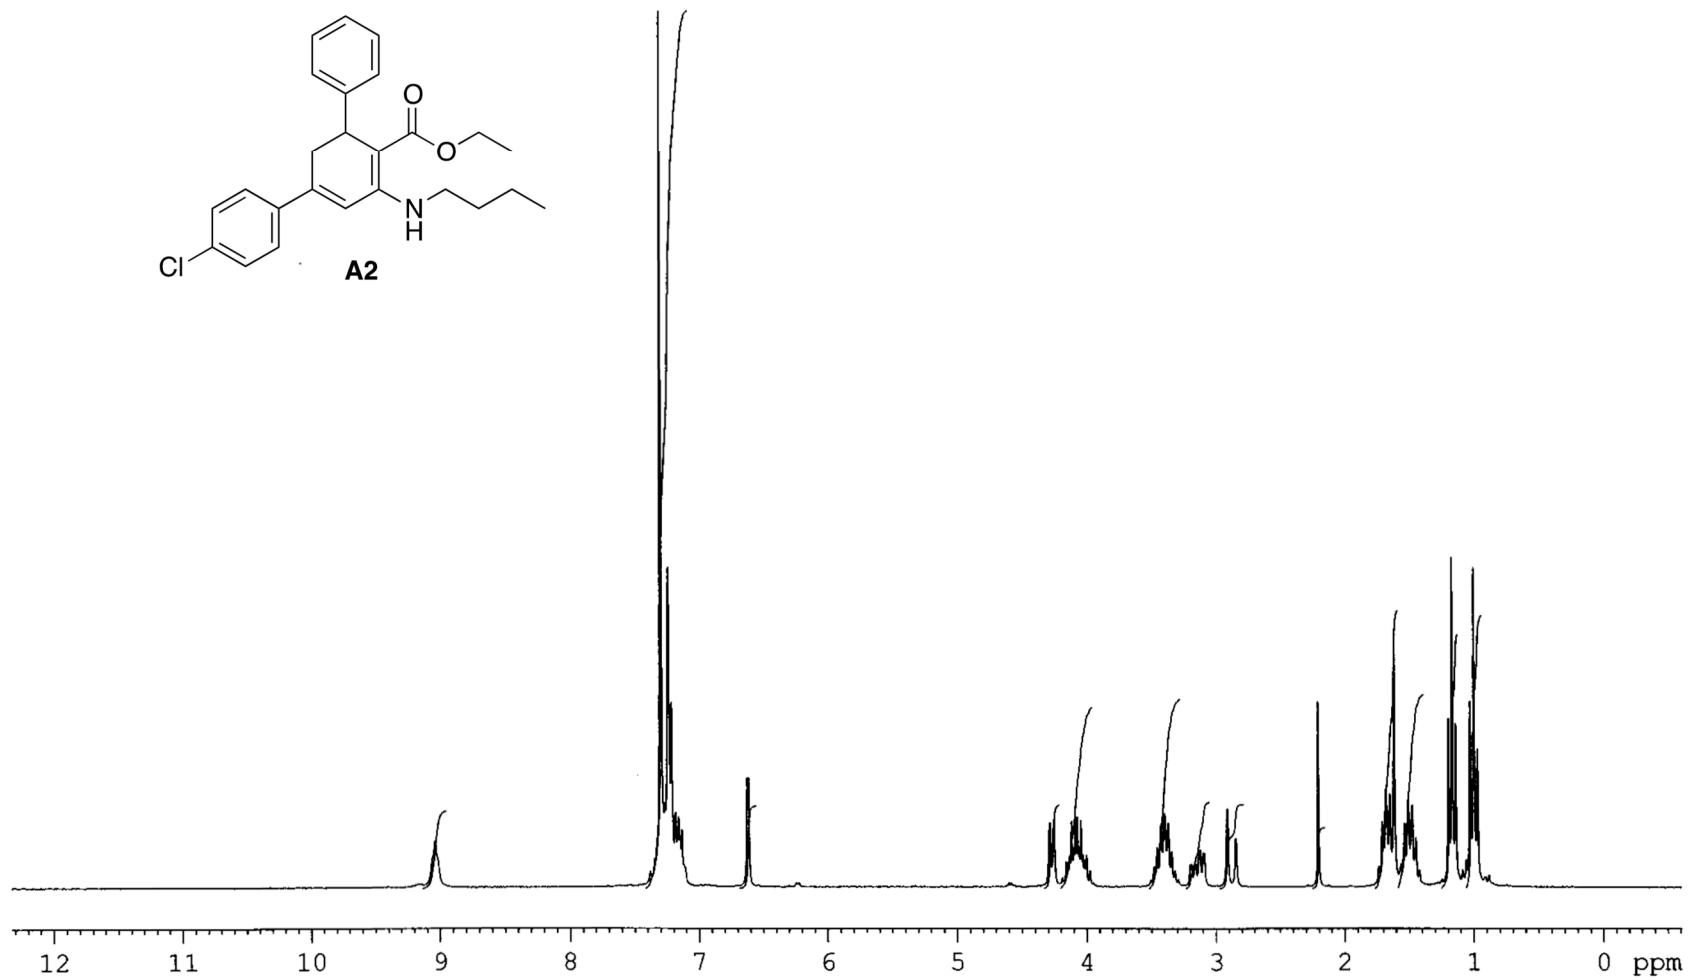

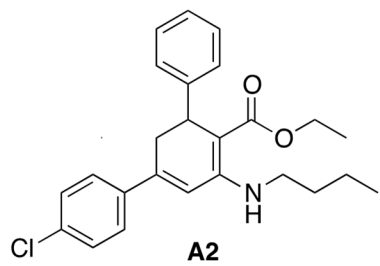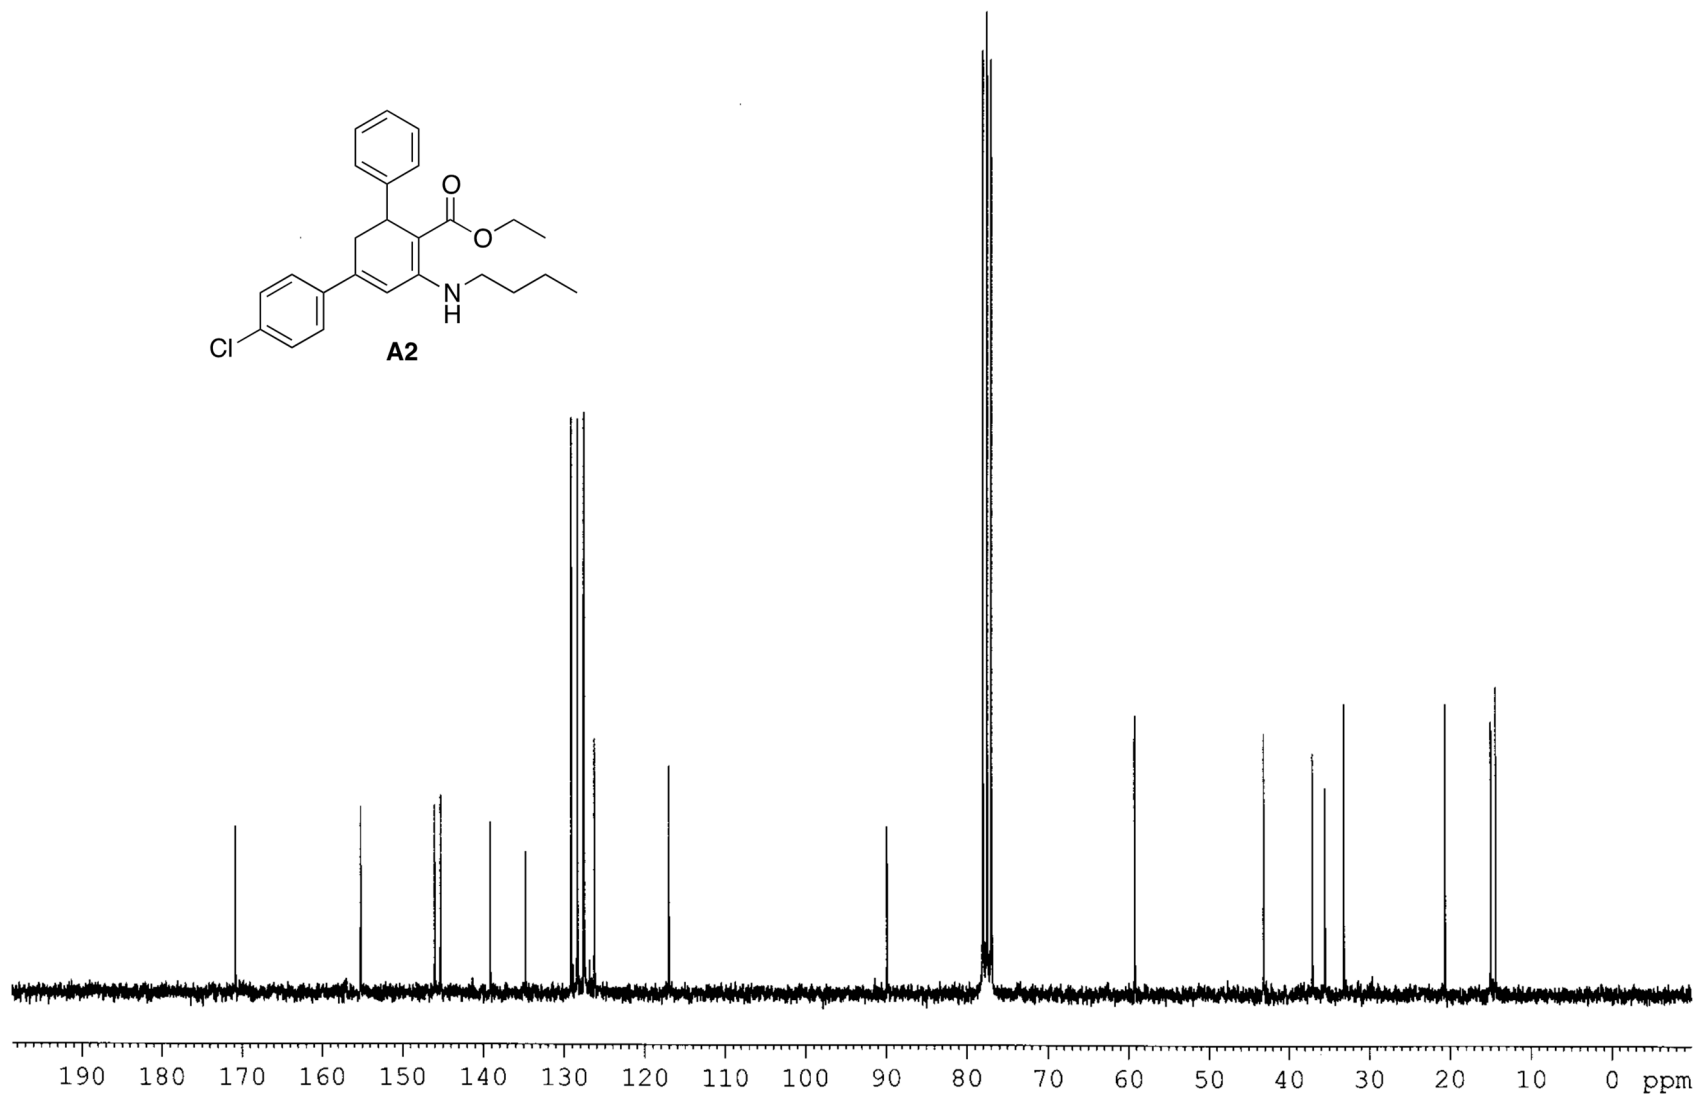

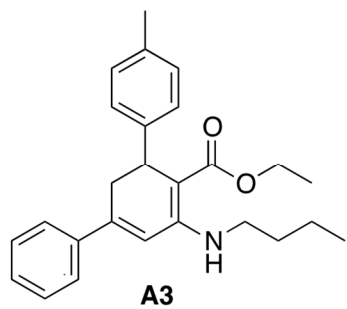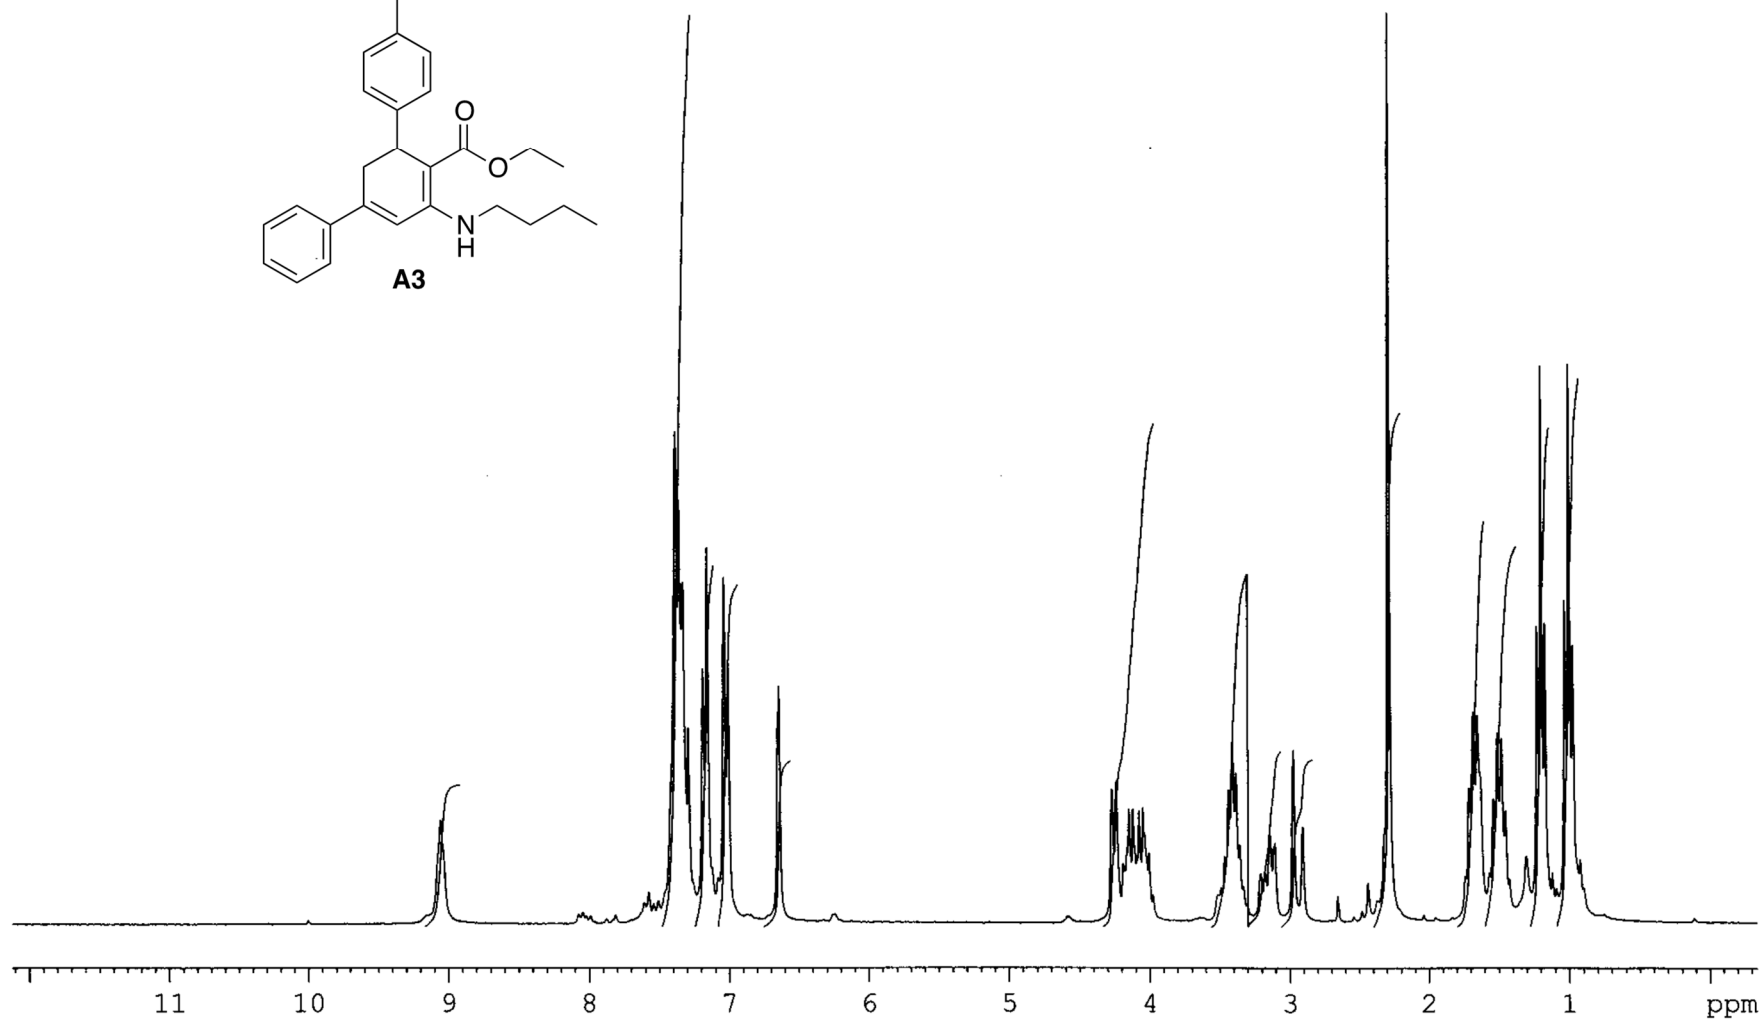

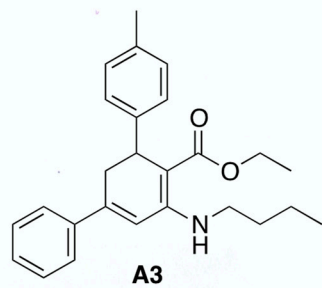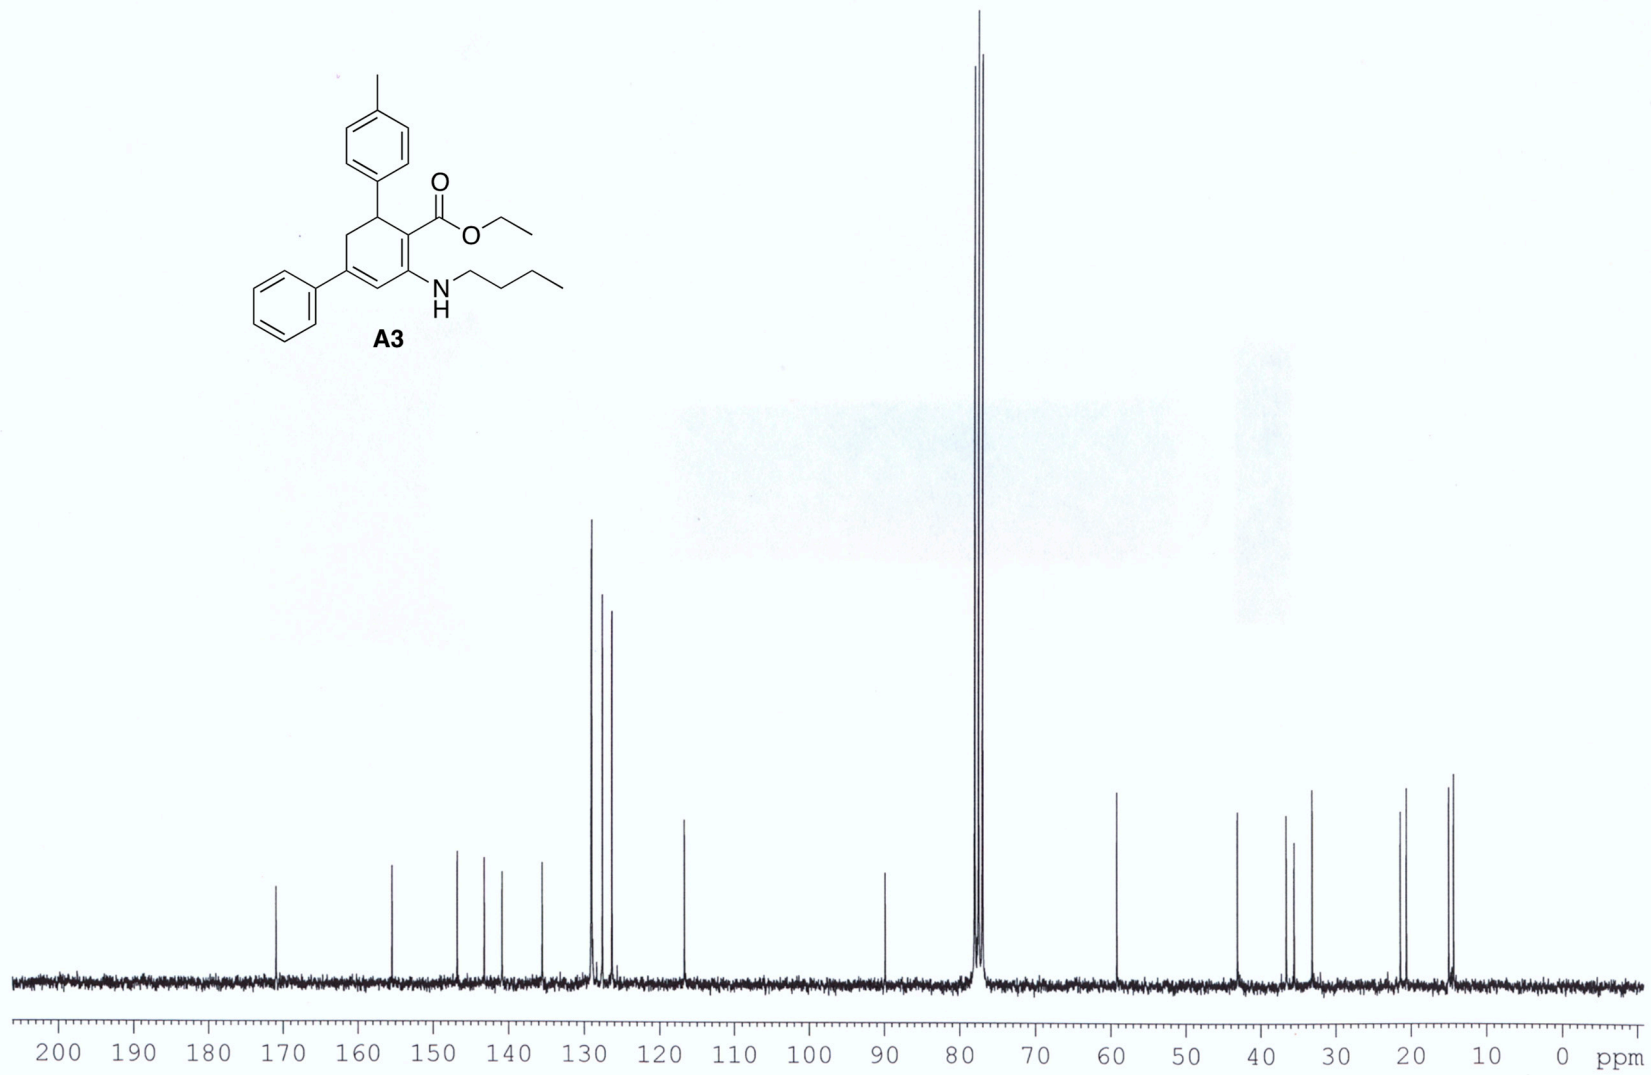

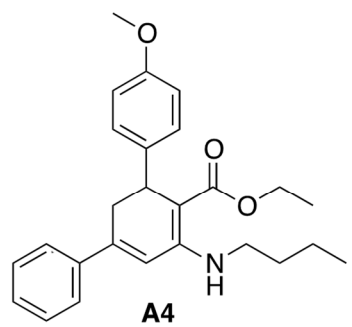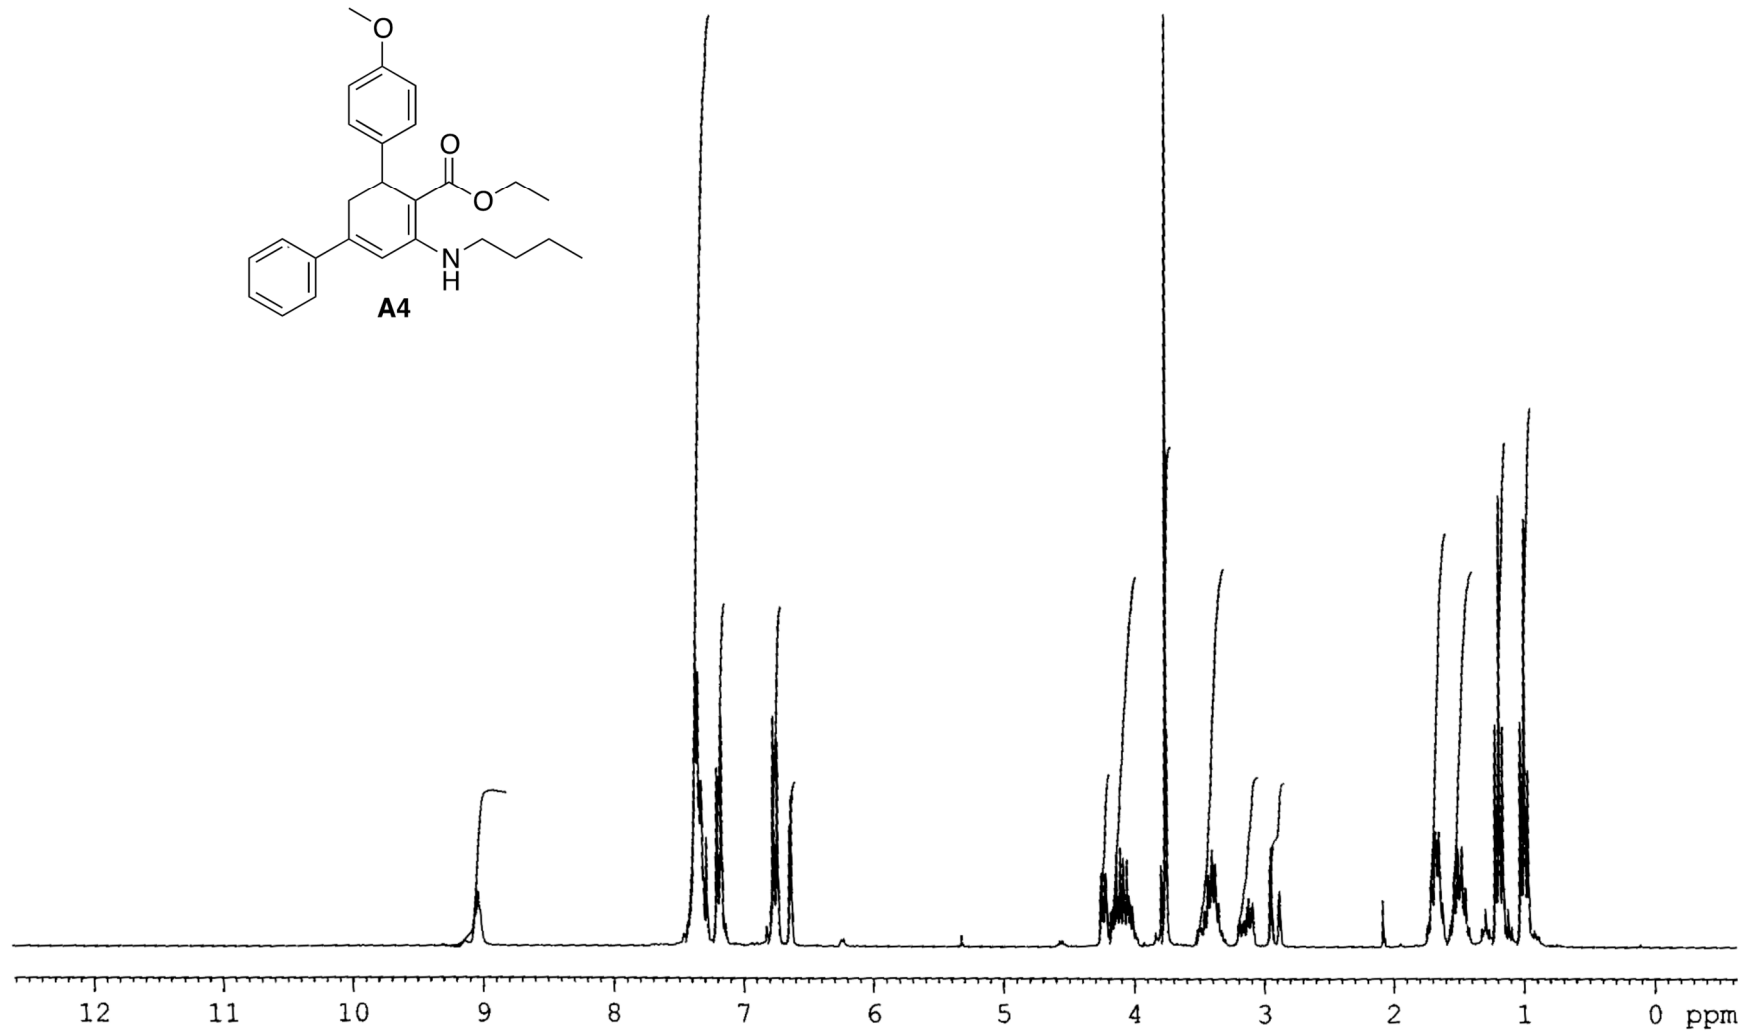



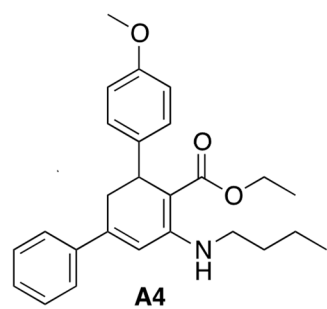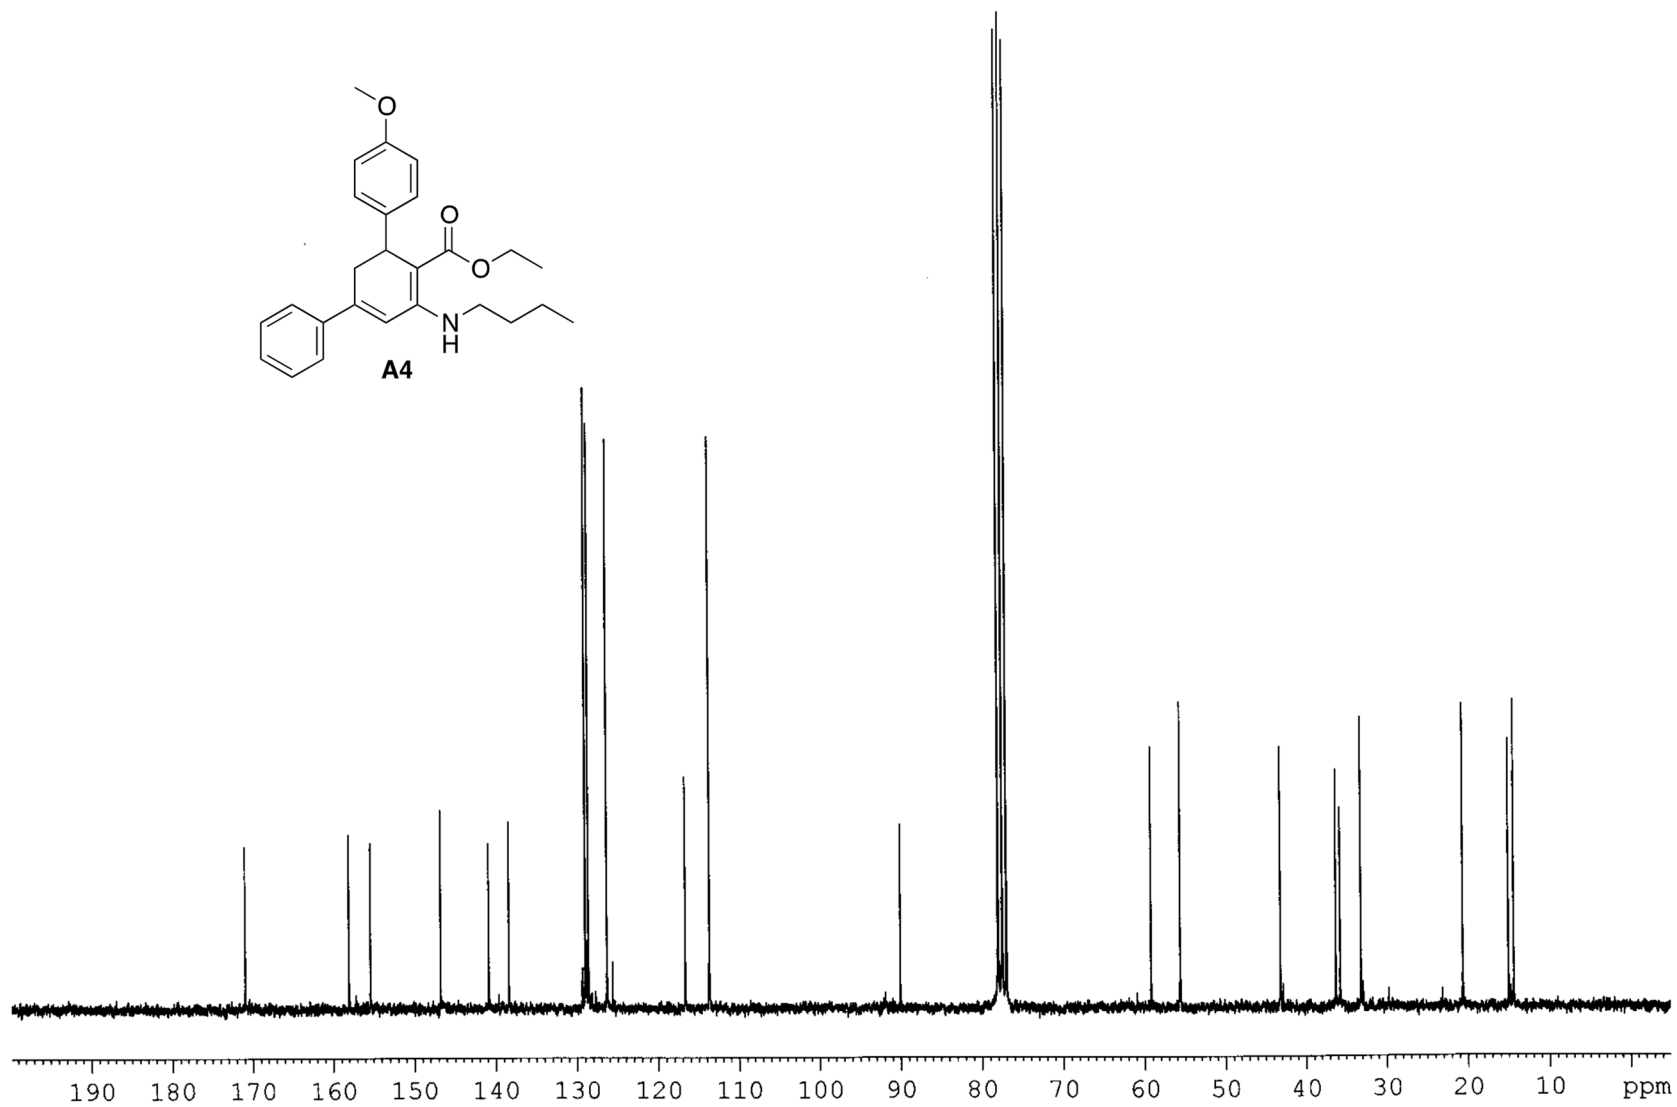

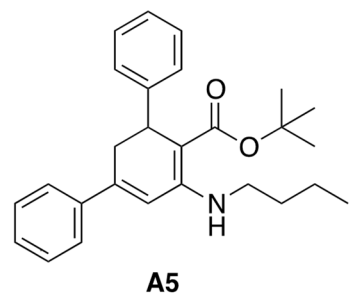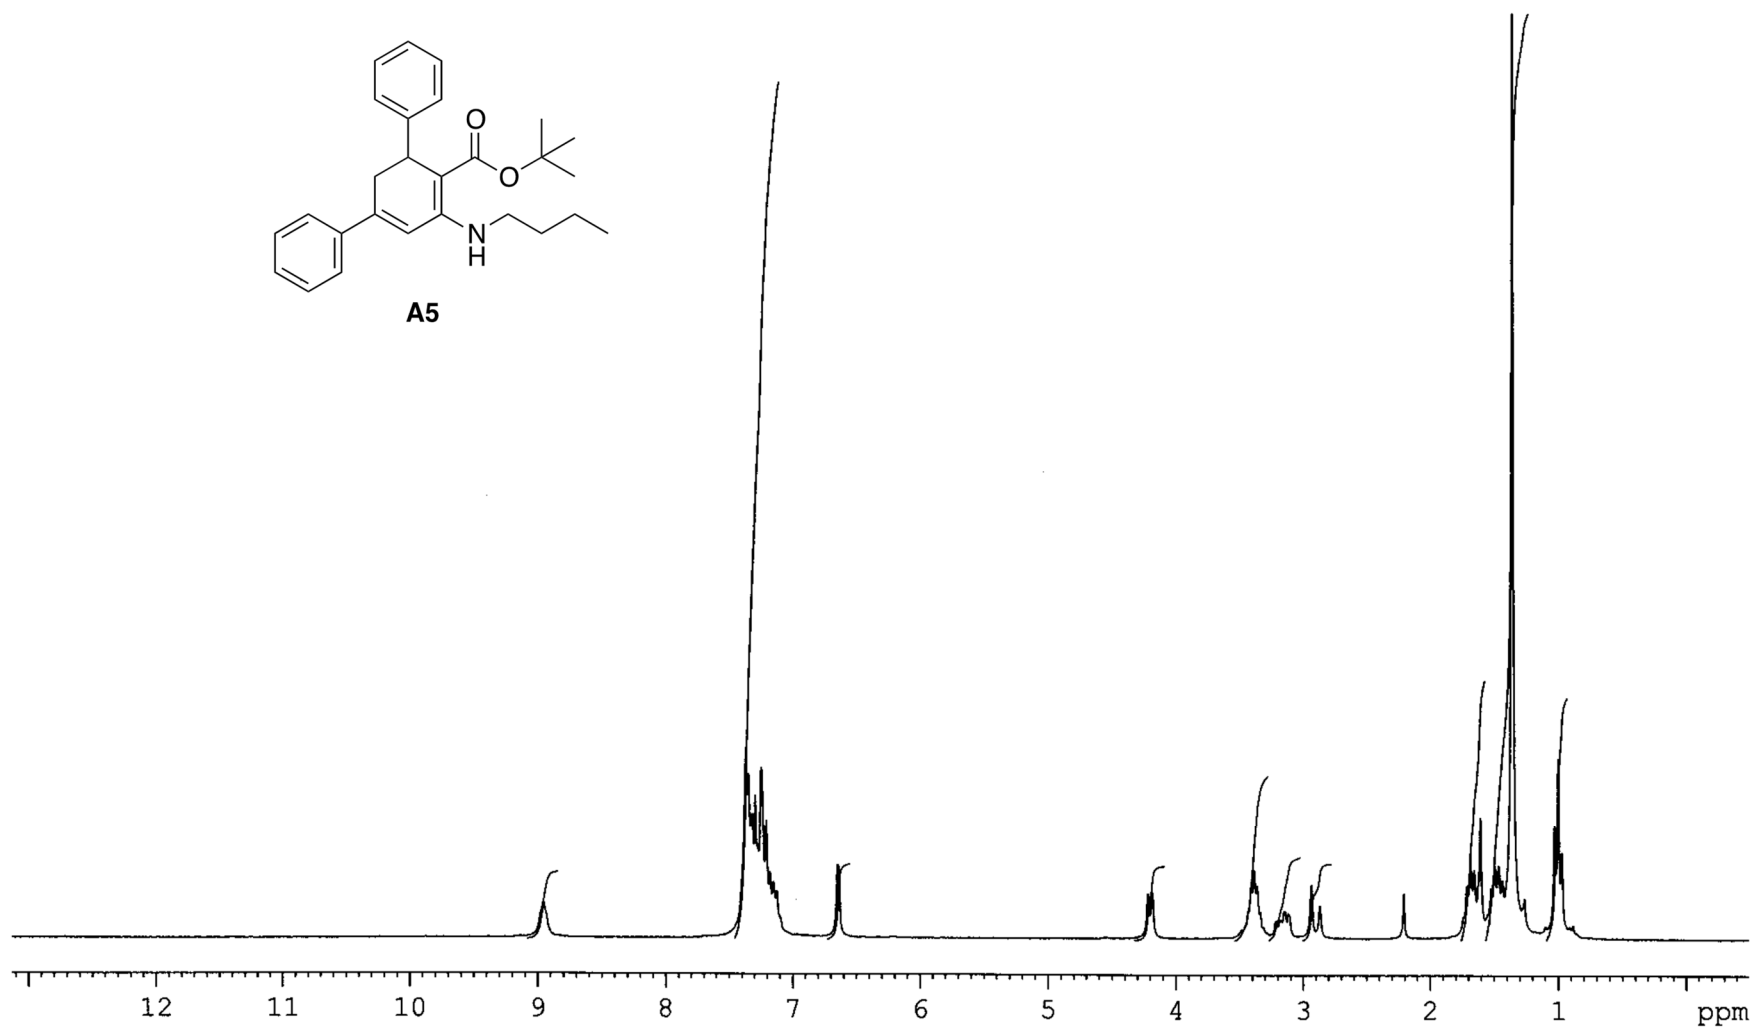

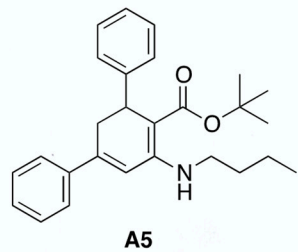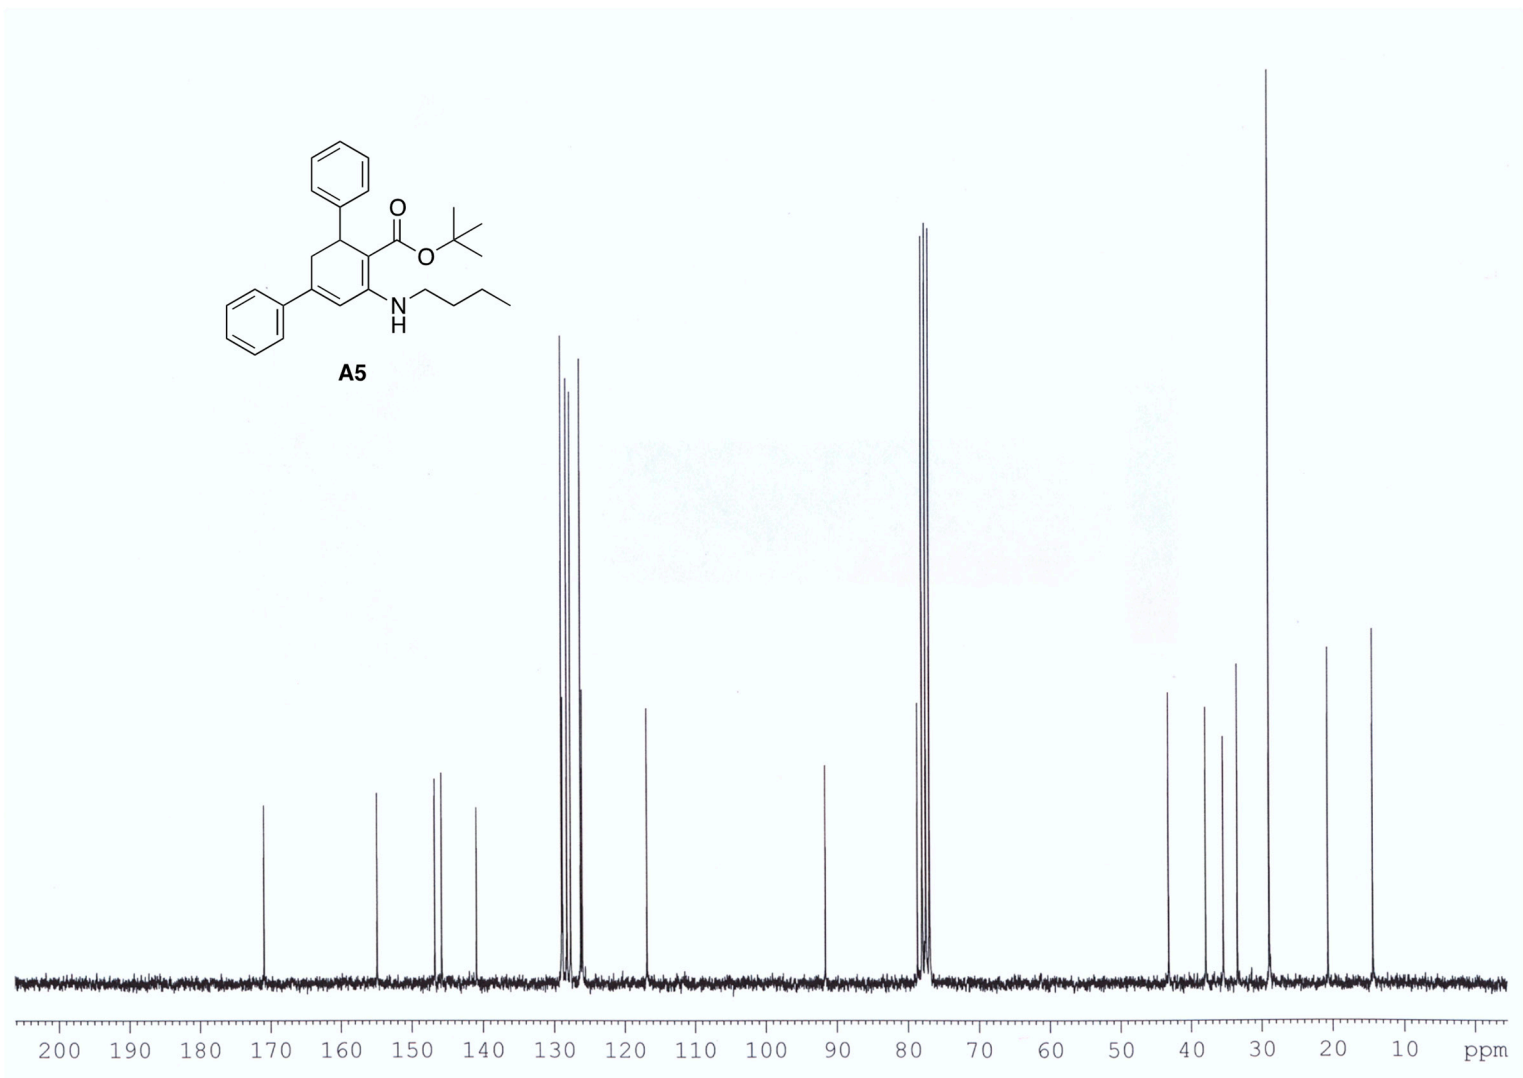

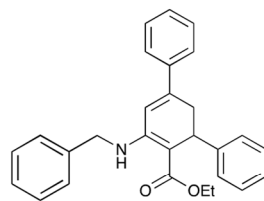

**A6**

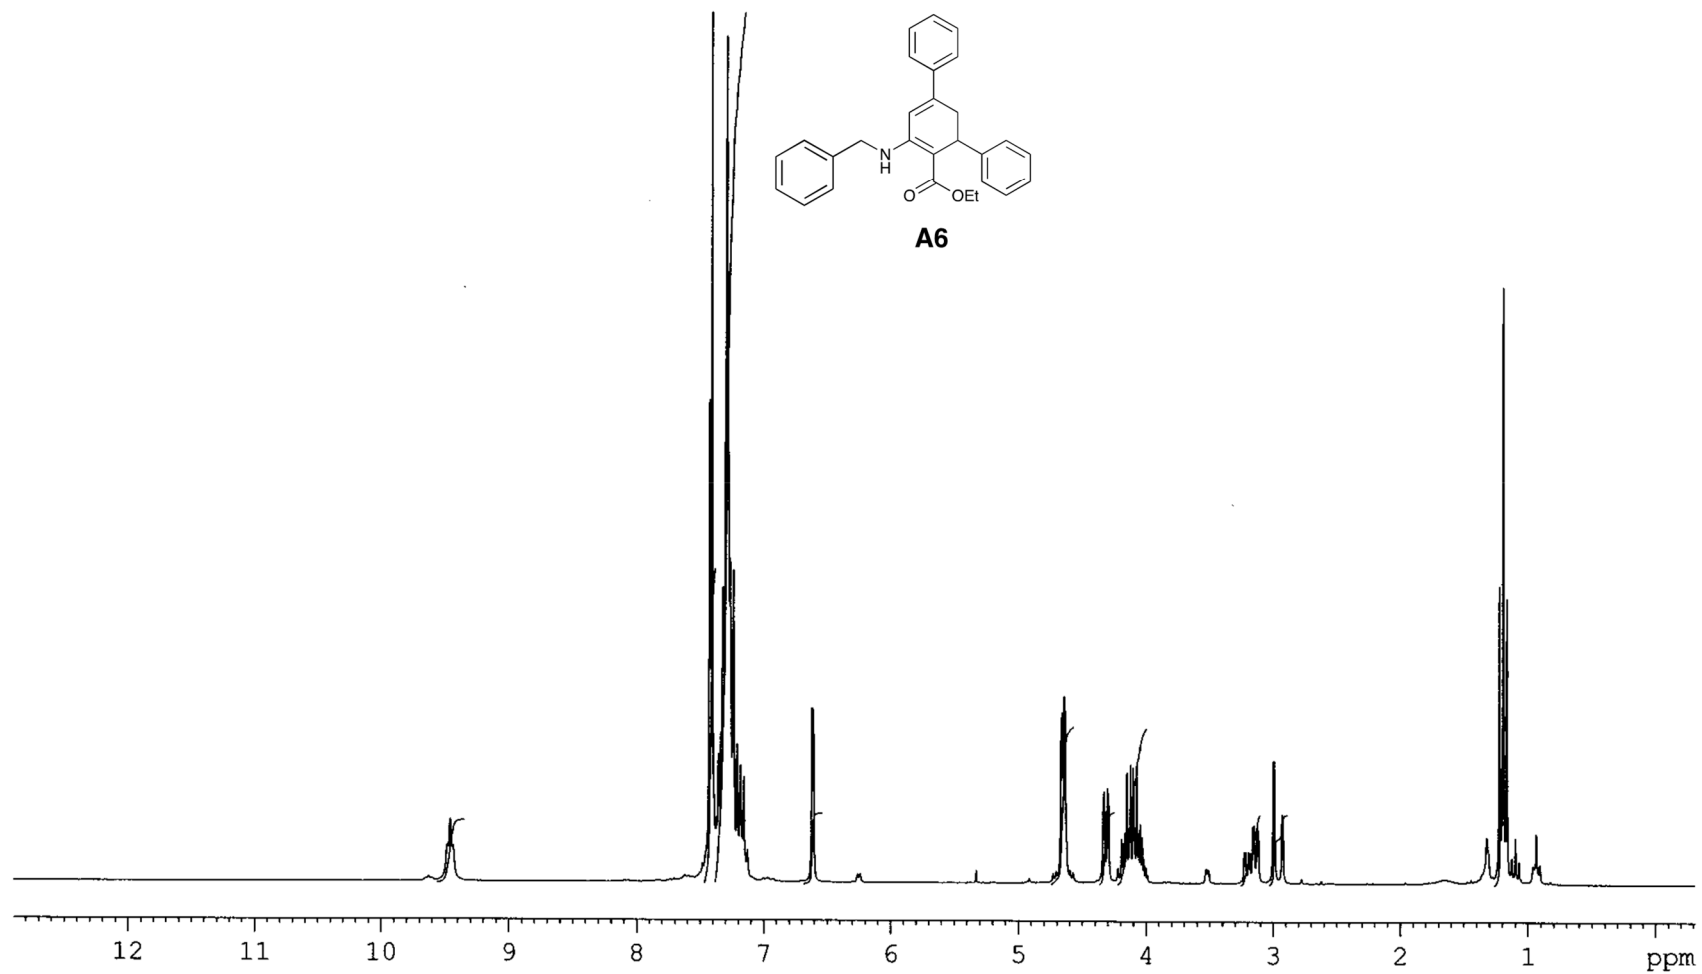

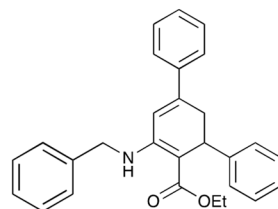

**A6**

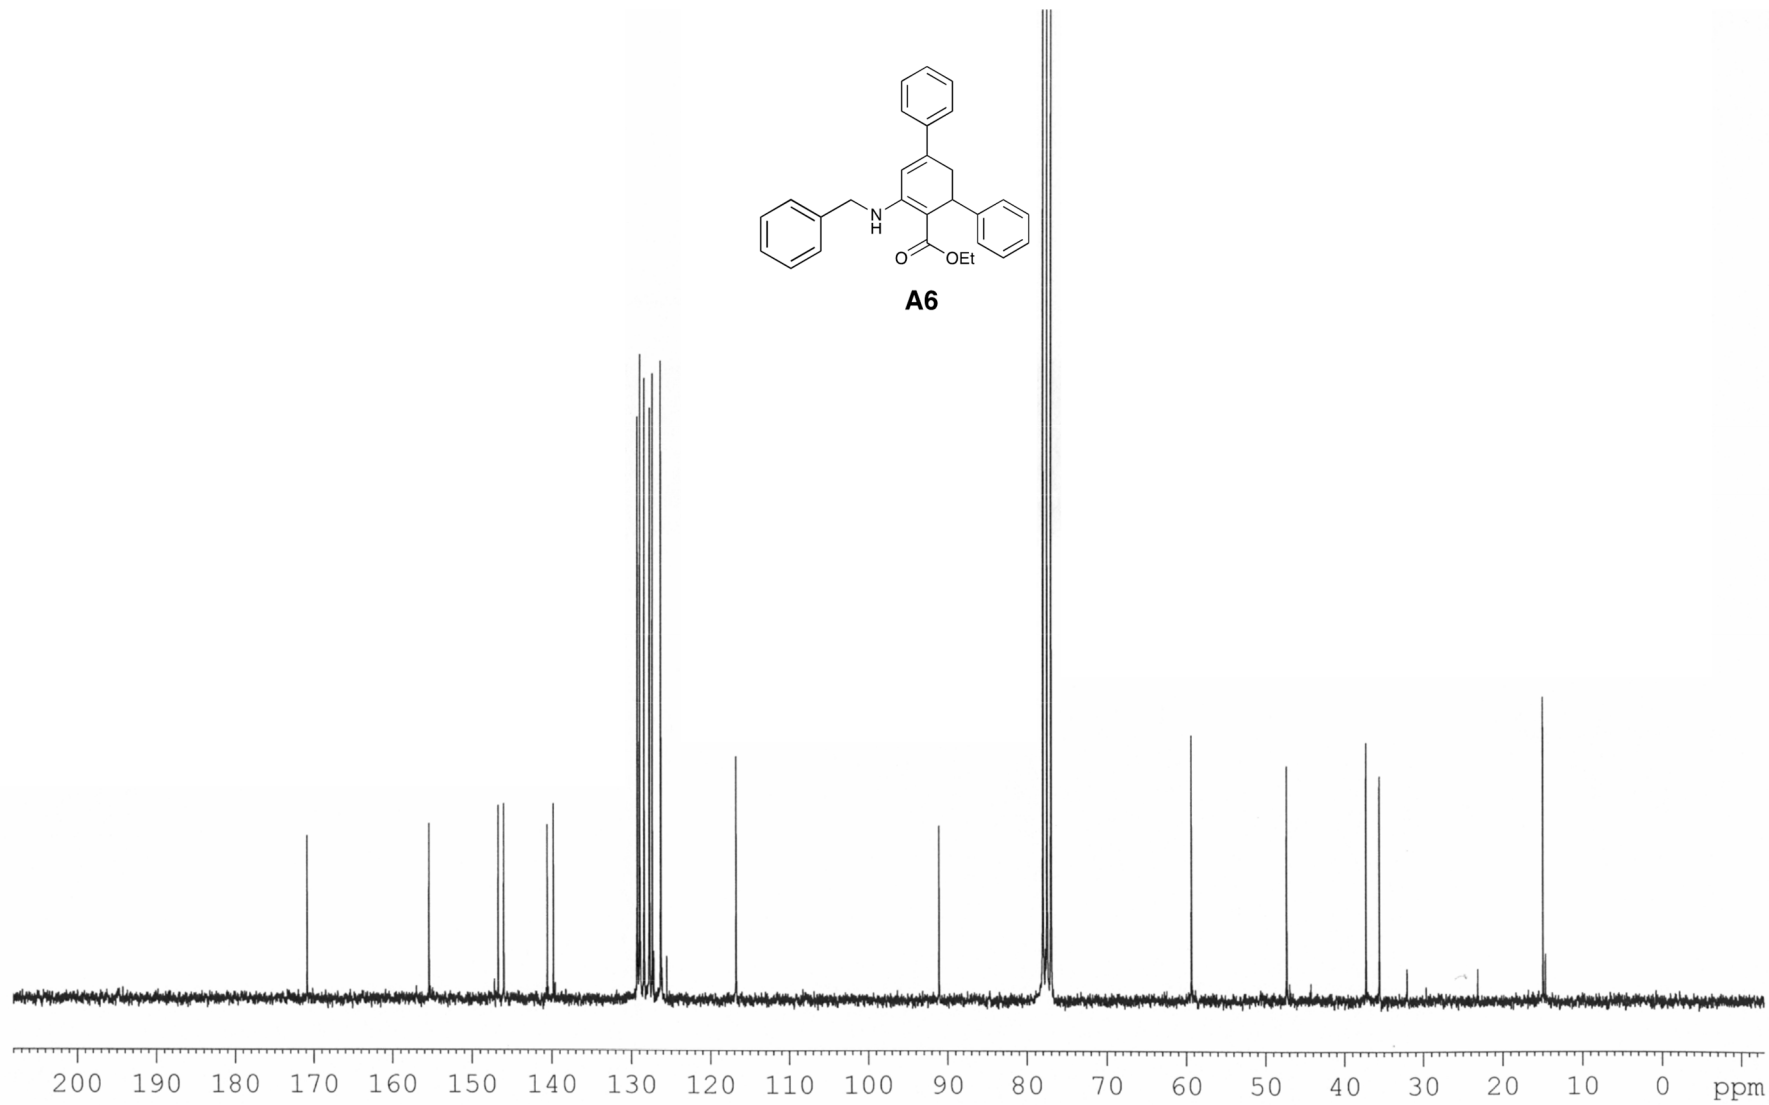

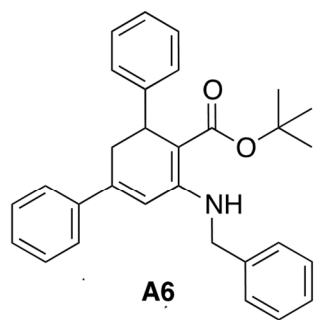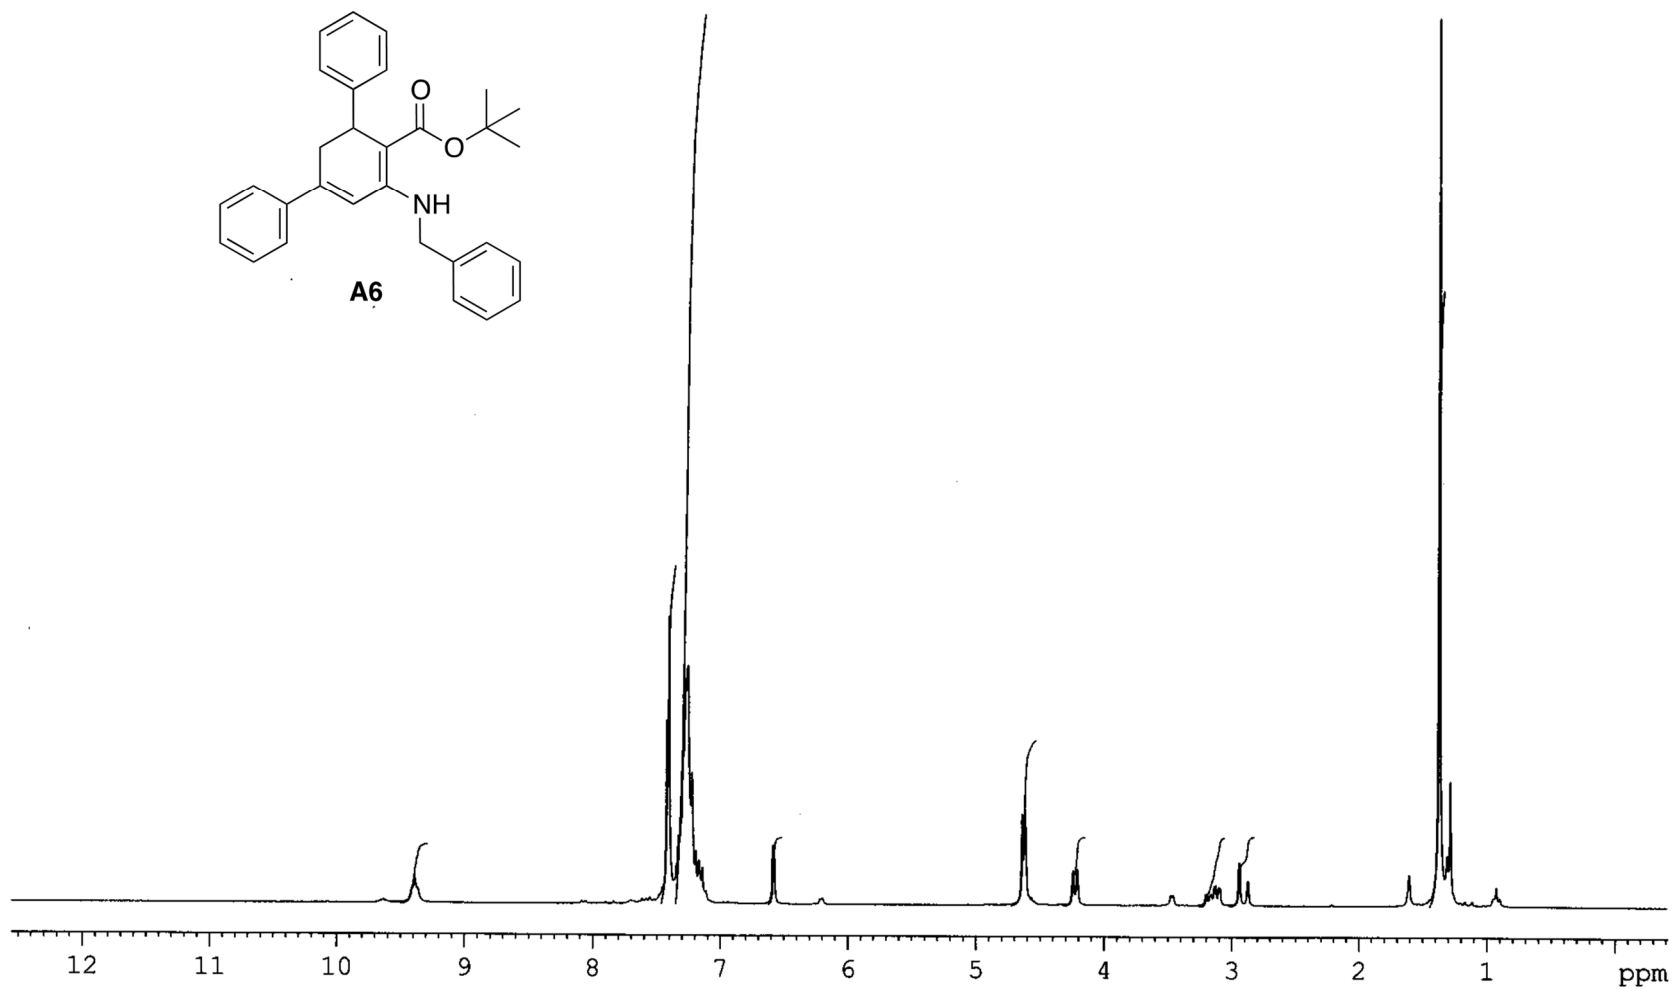

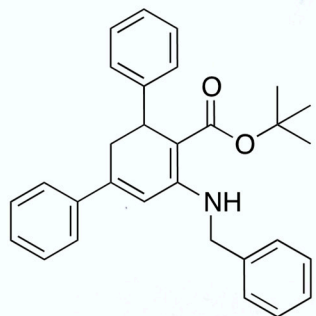

A7

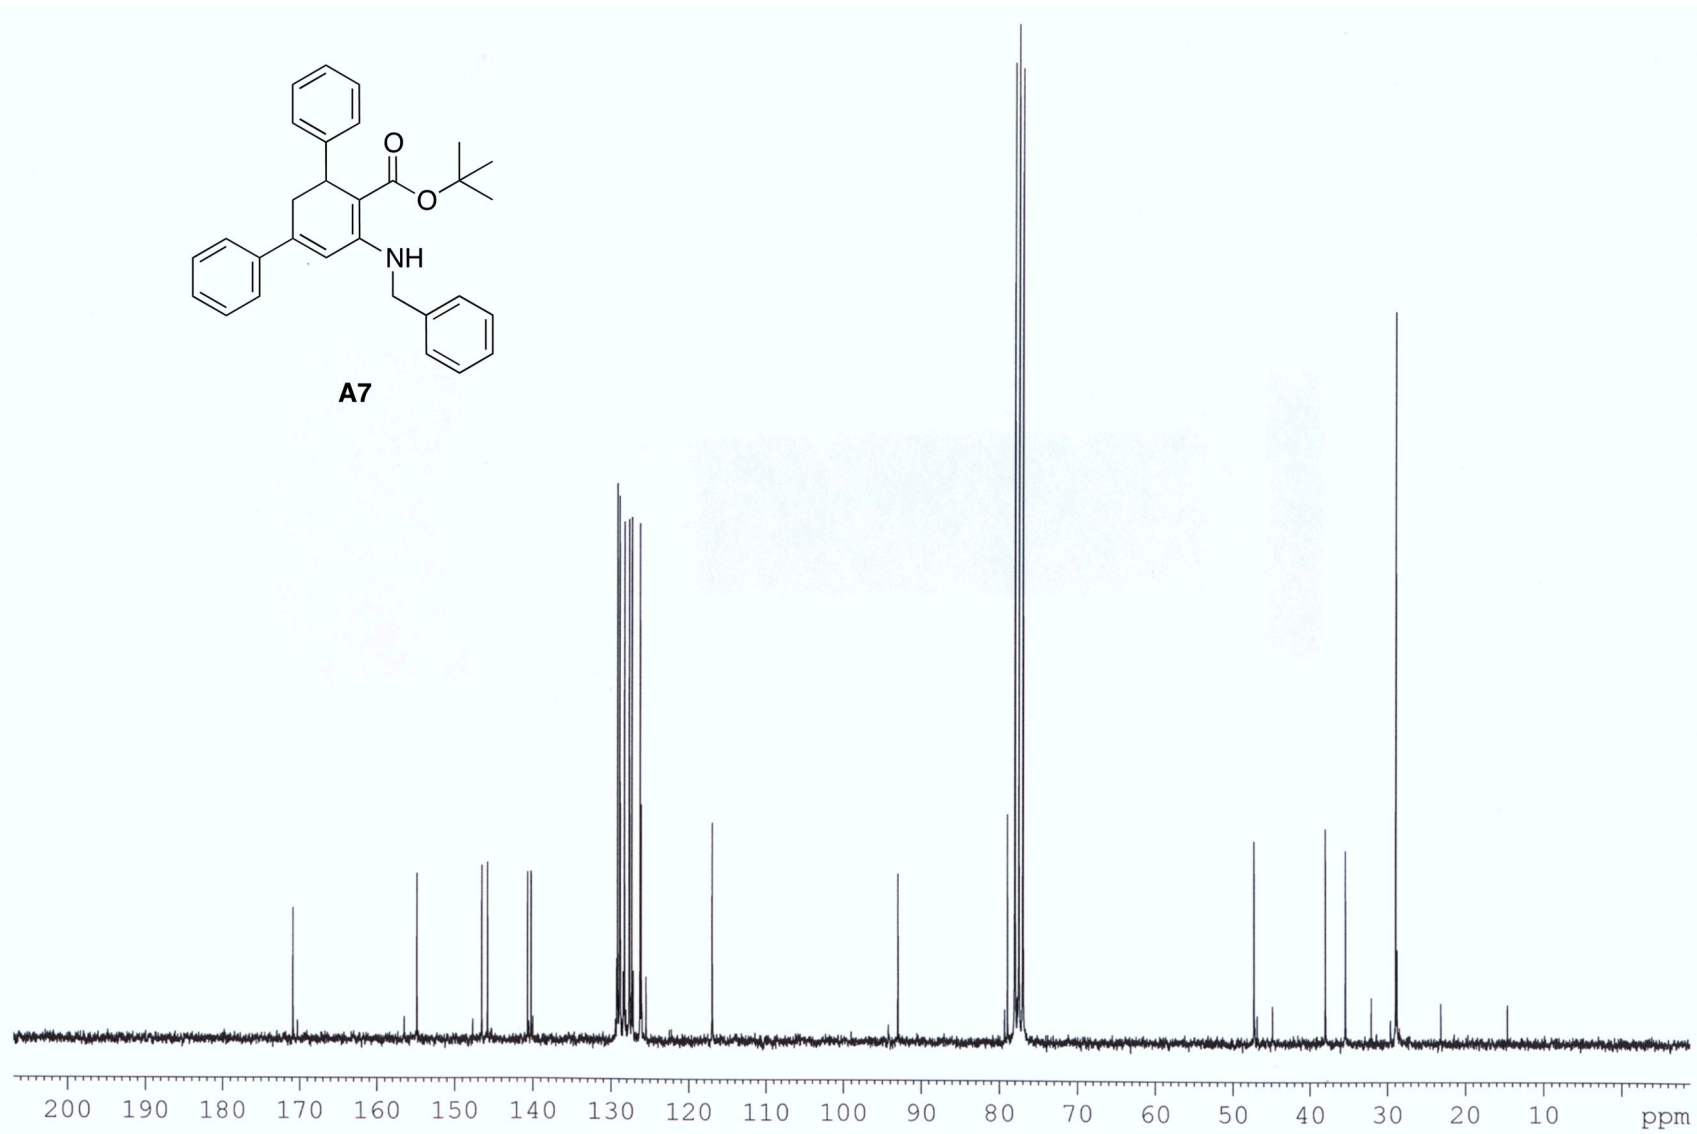

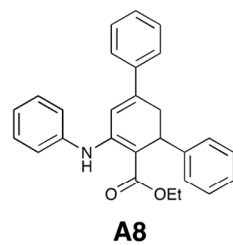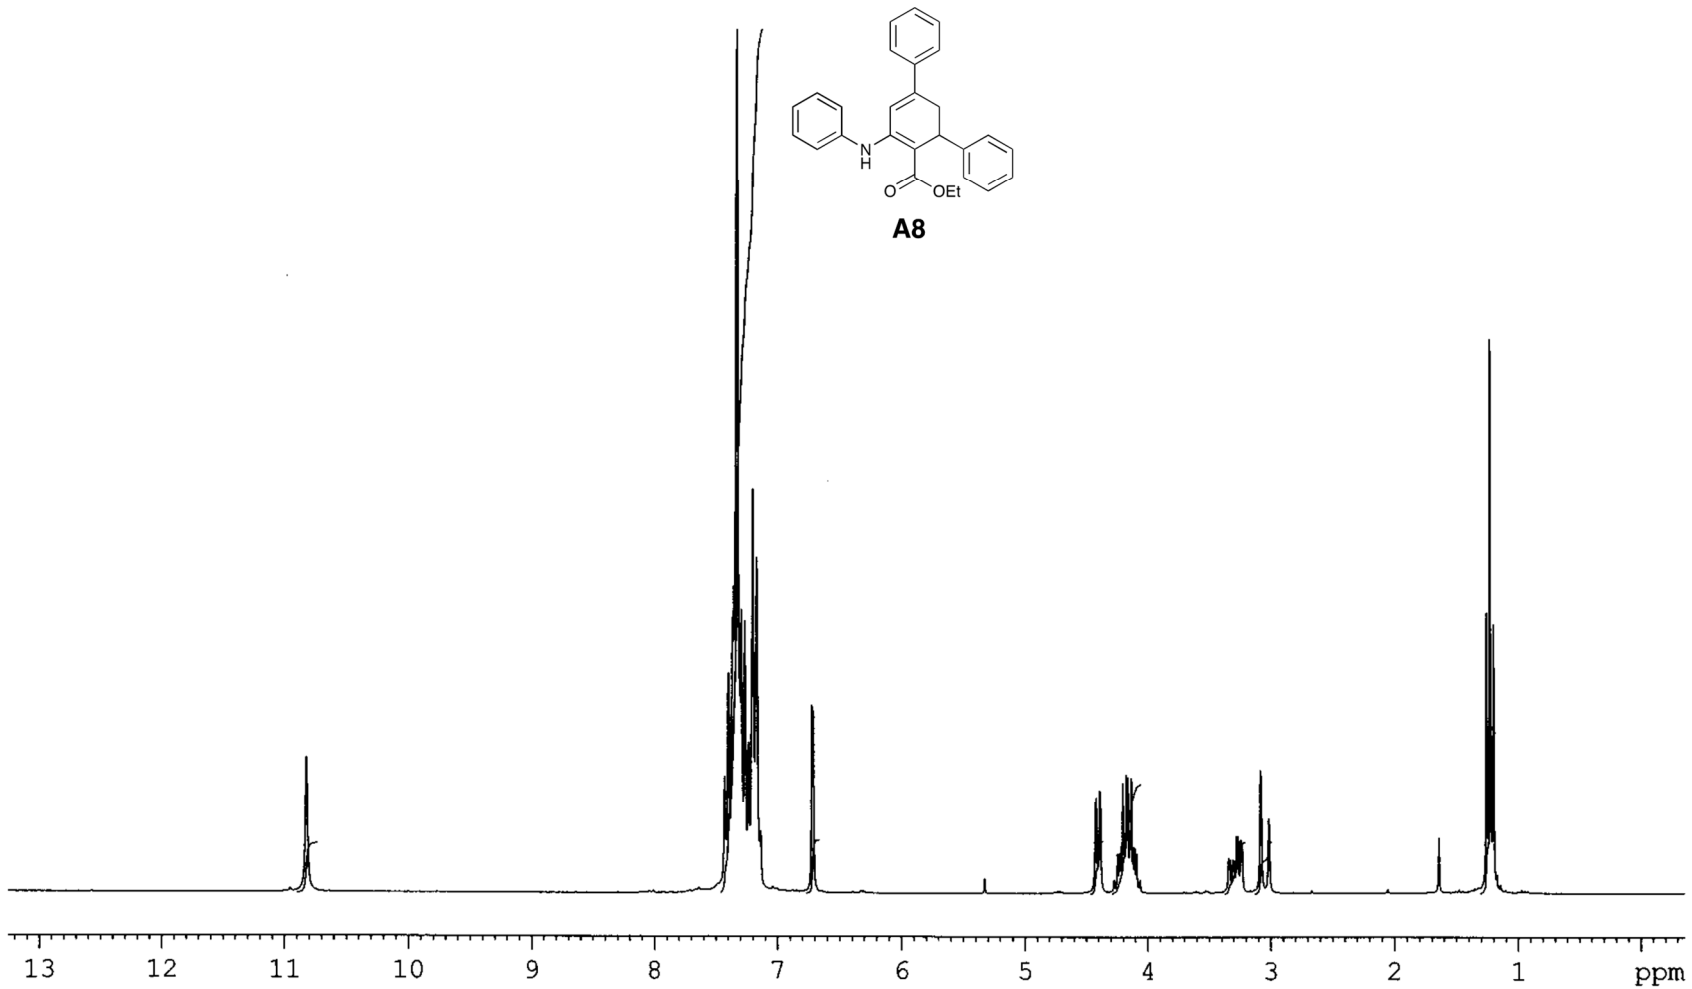



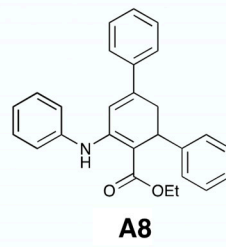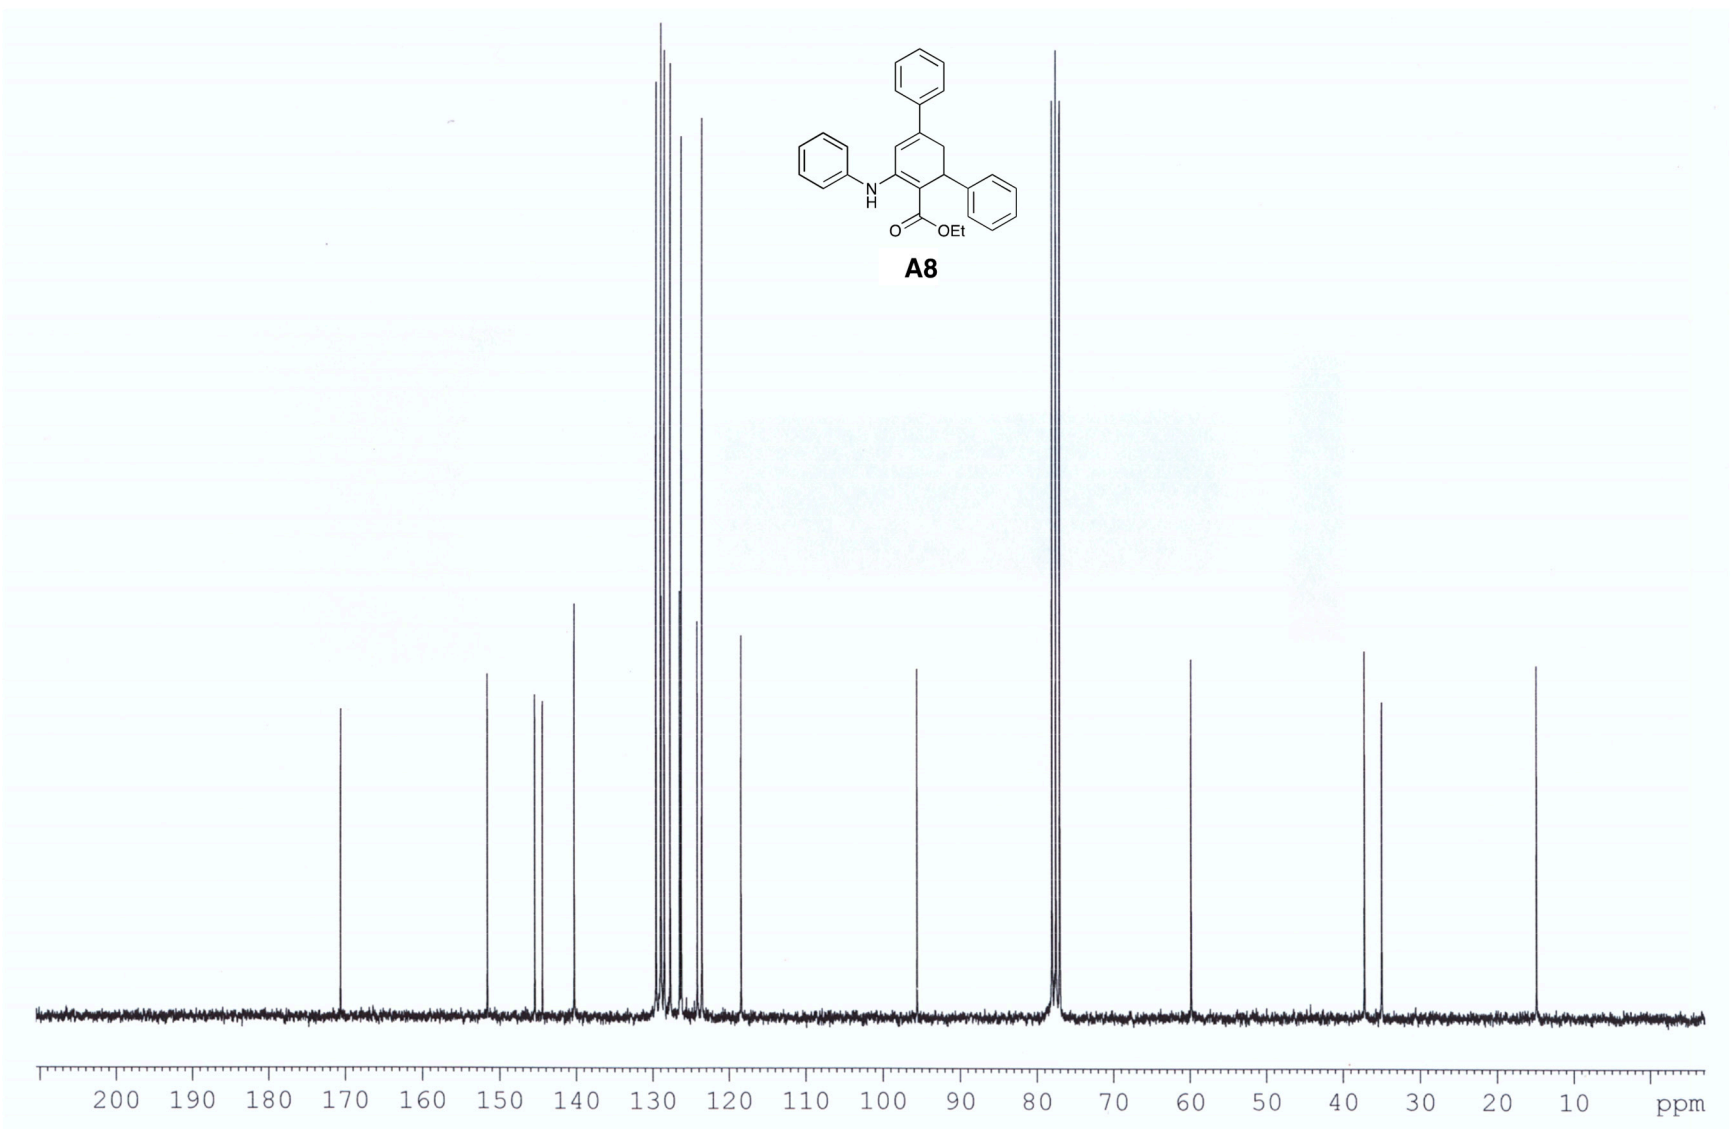

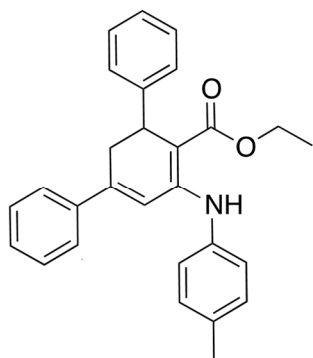

A9

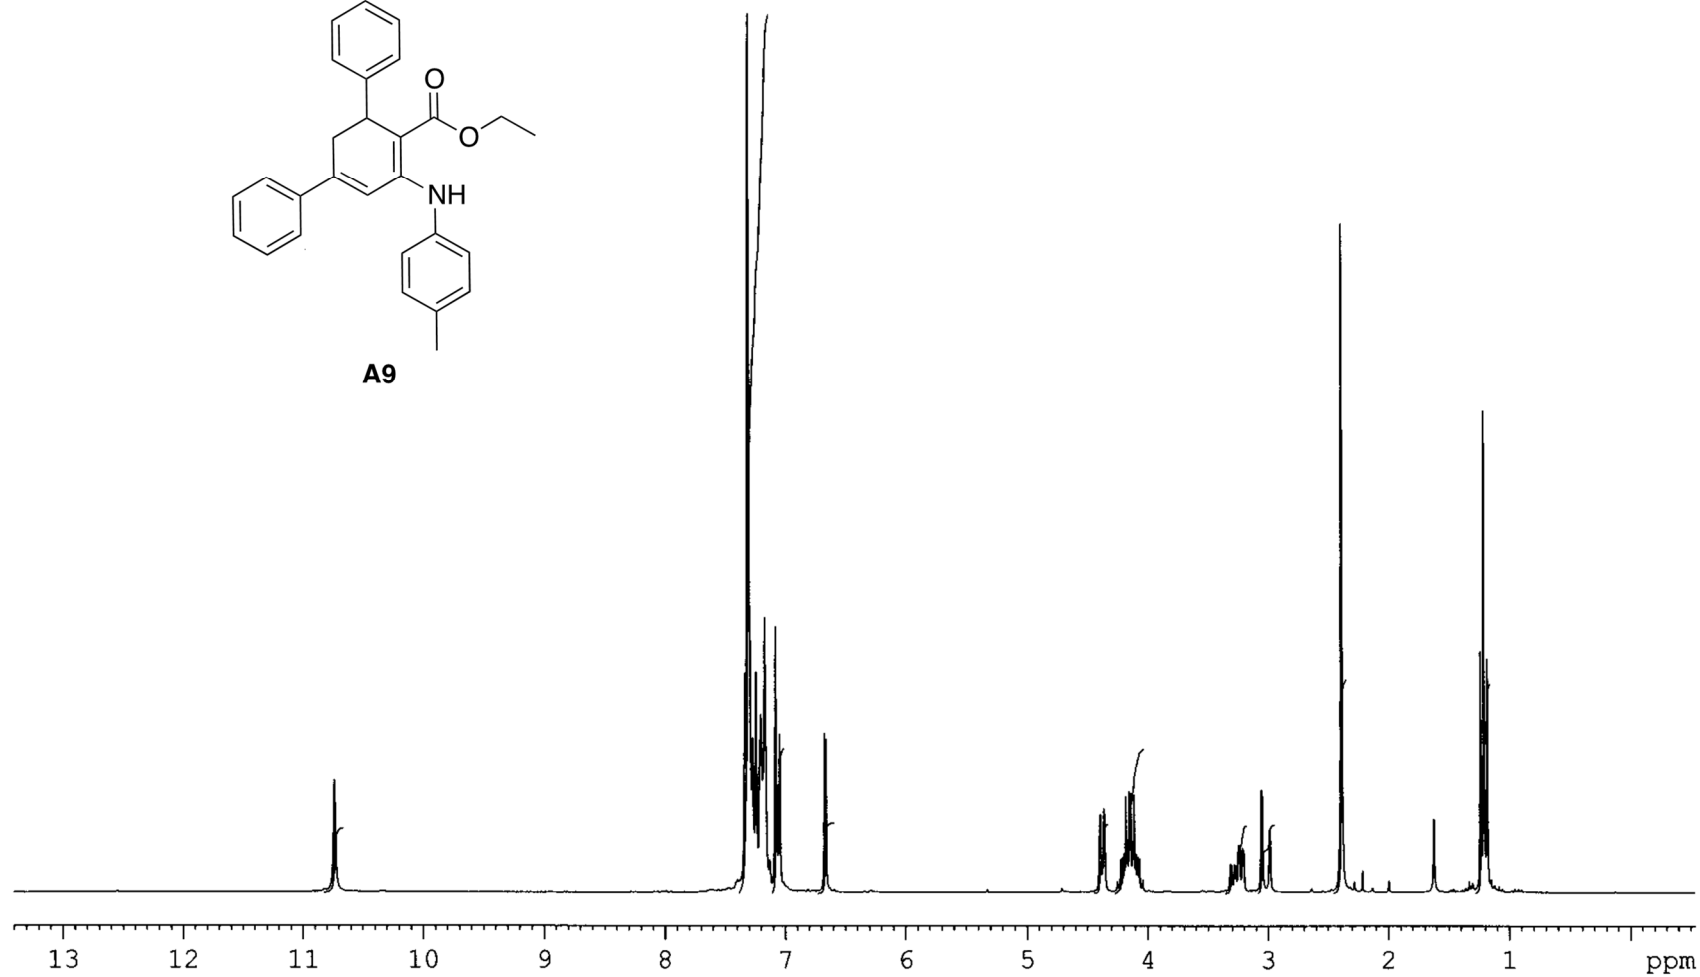

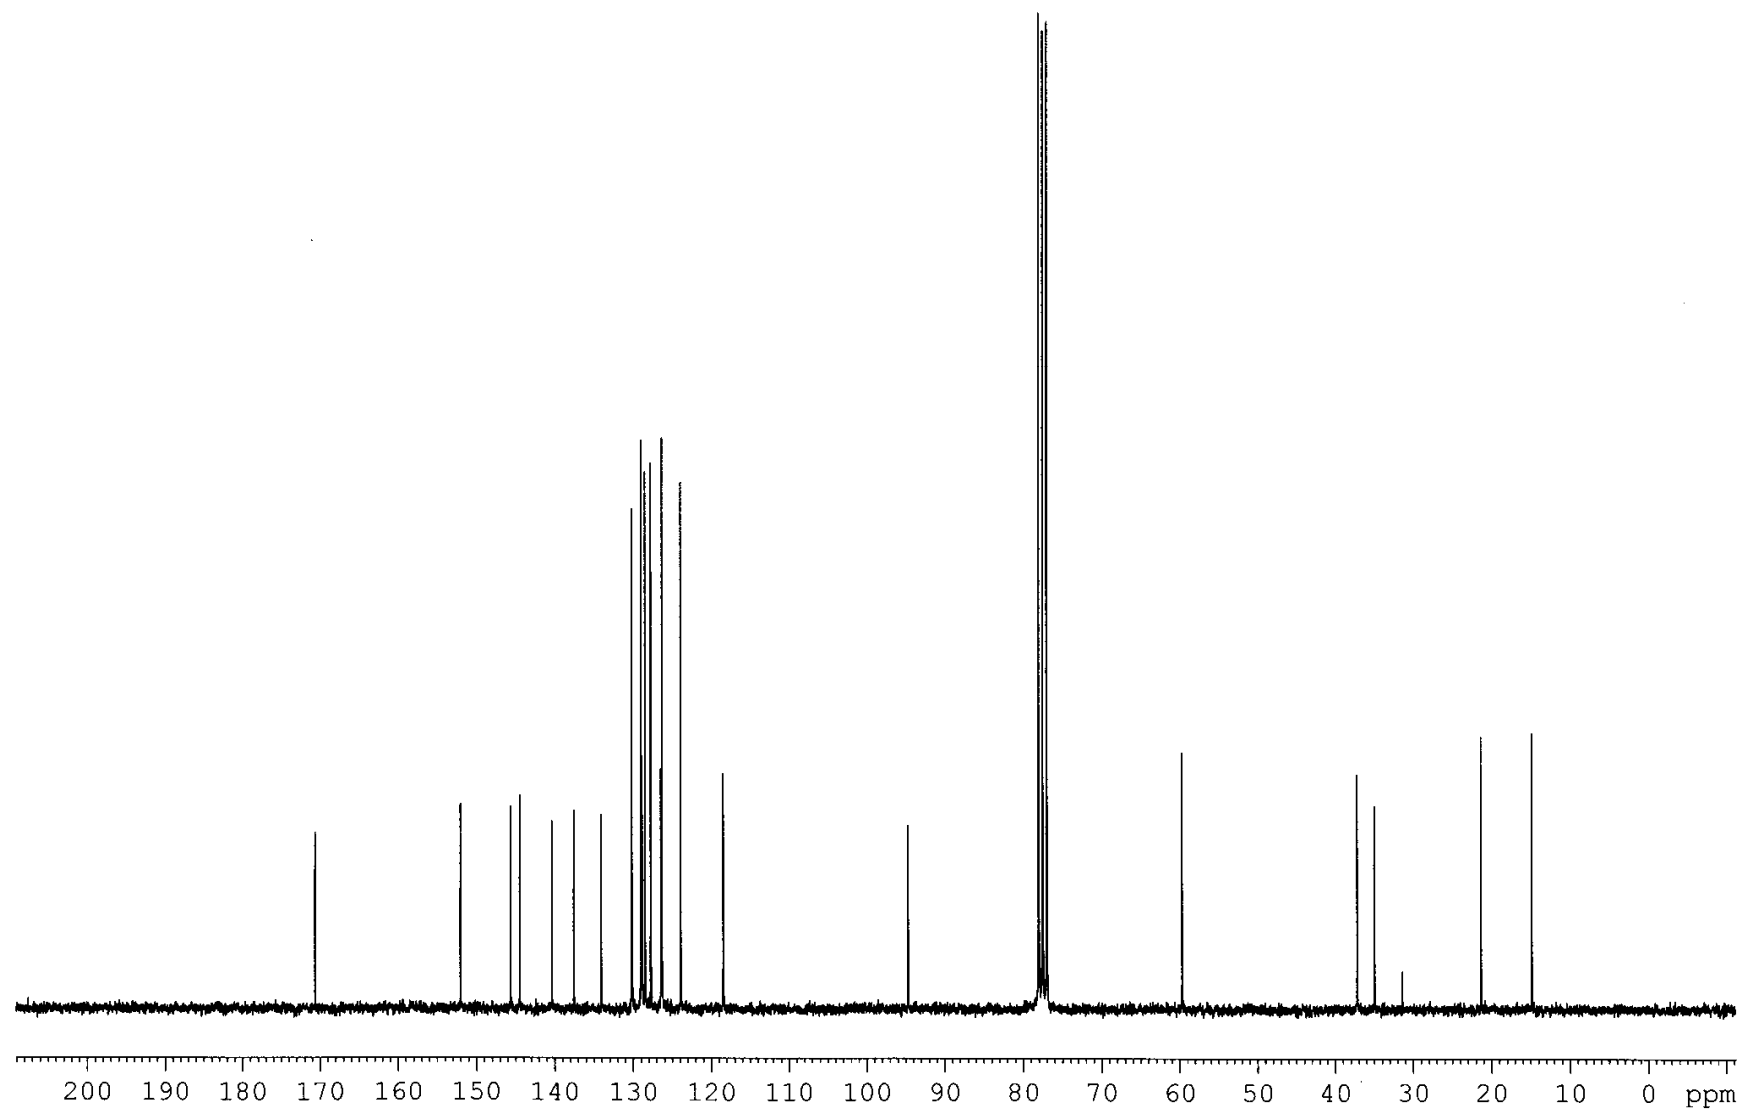

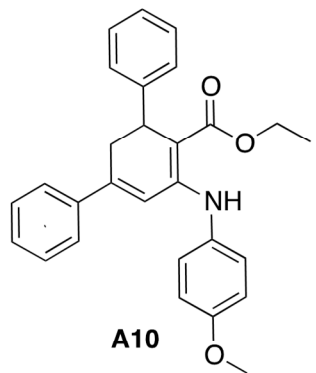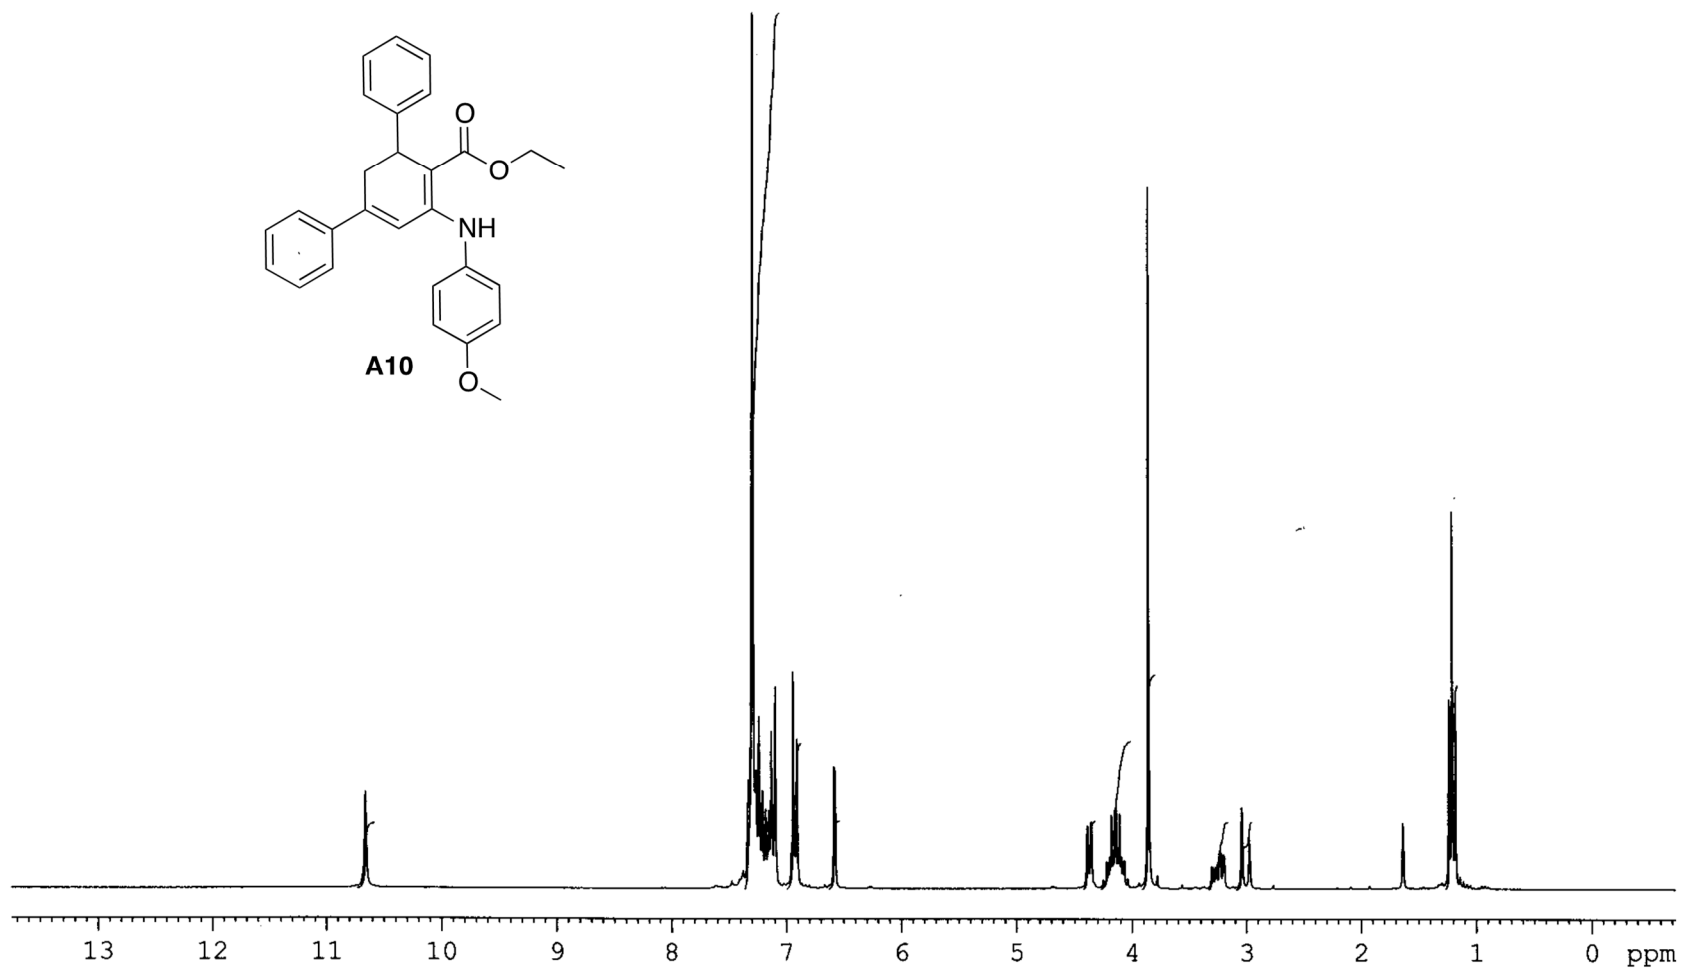

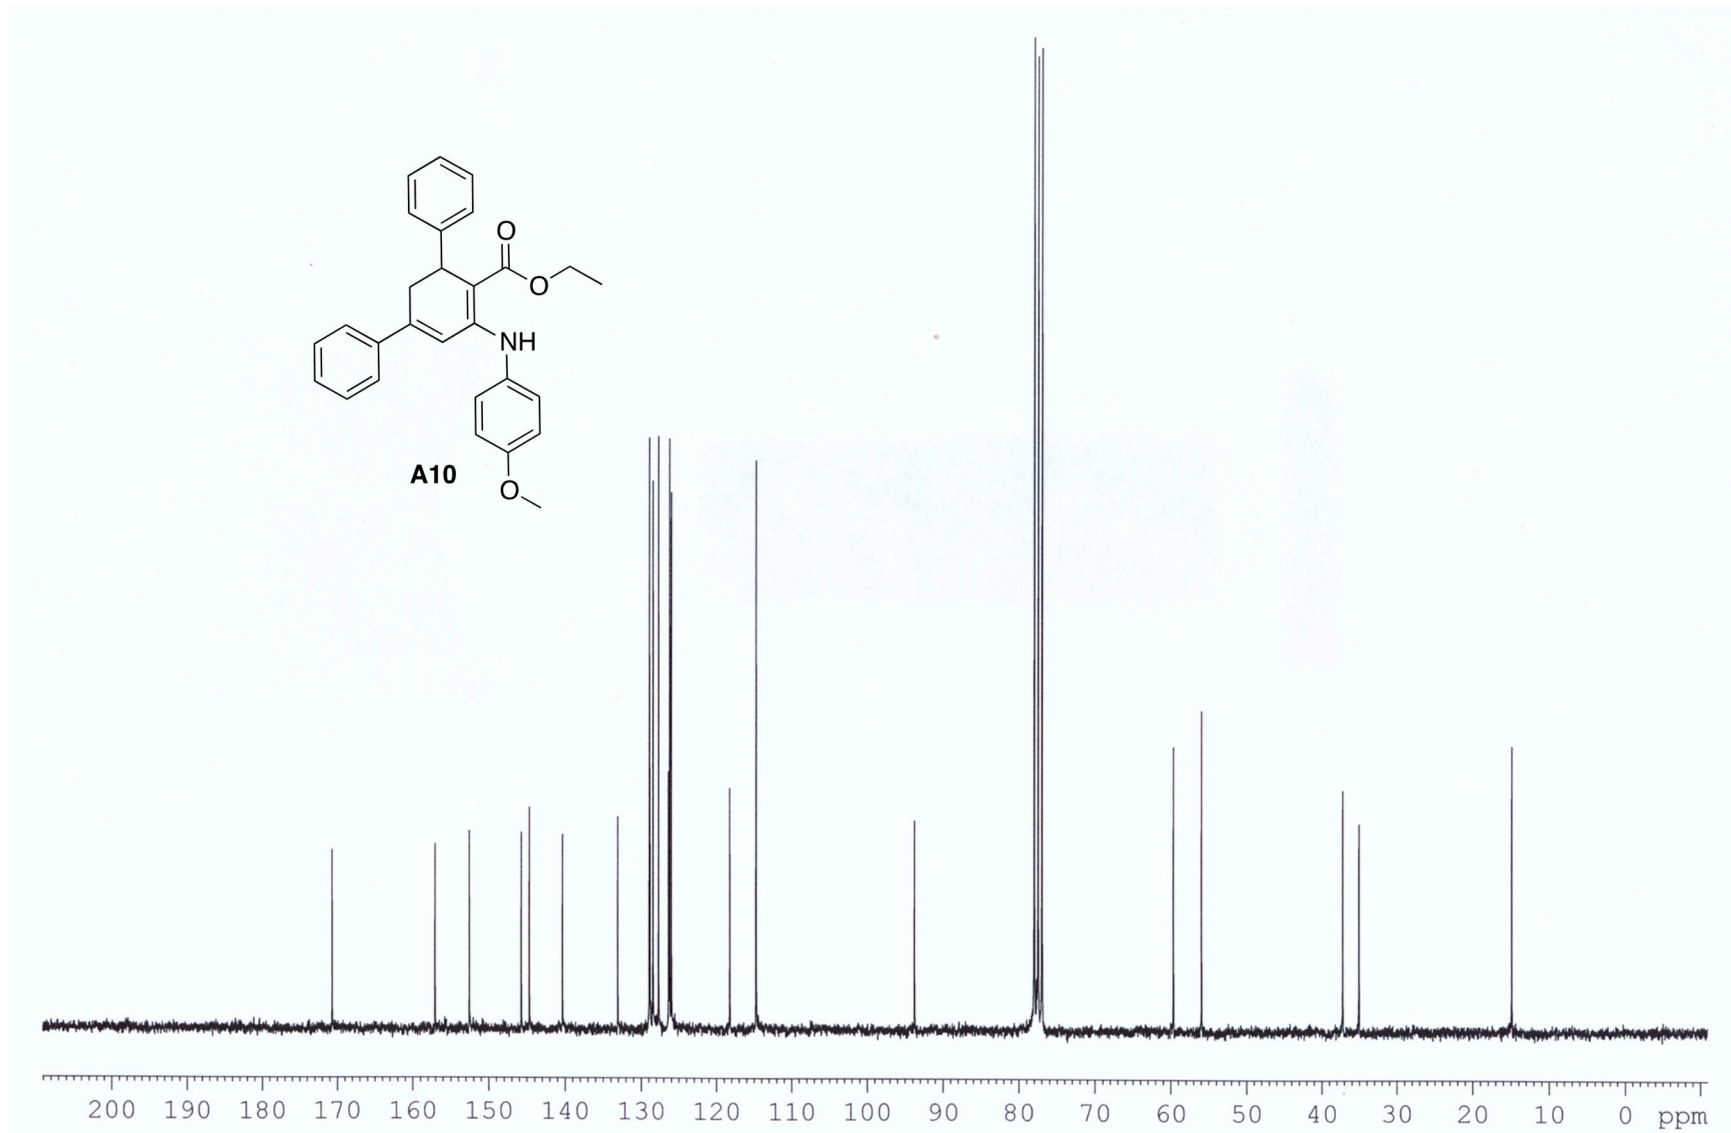

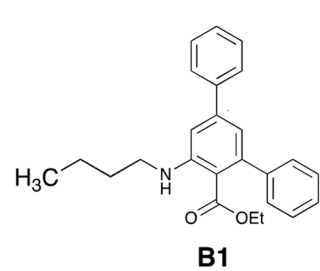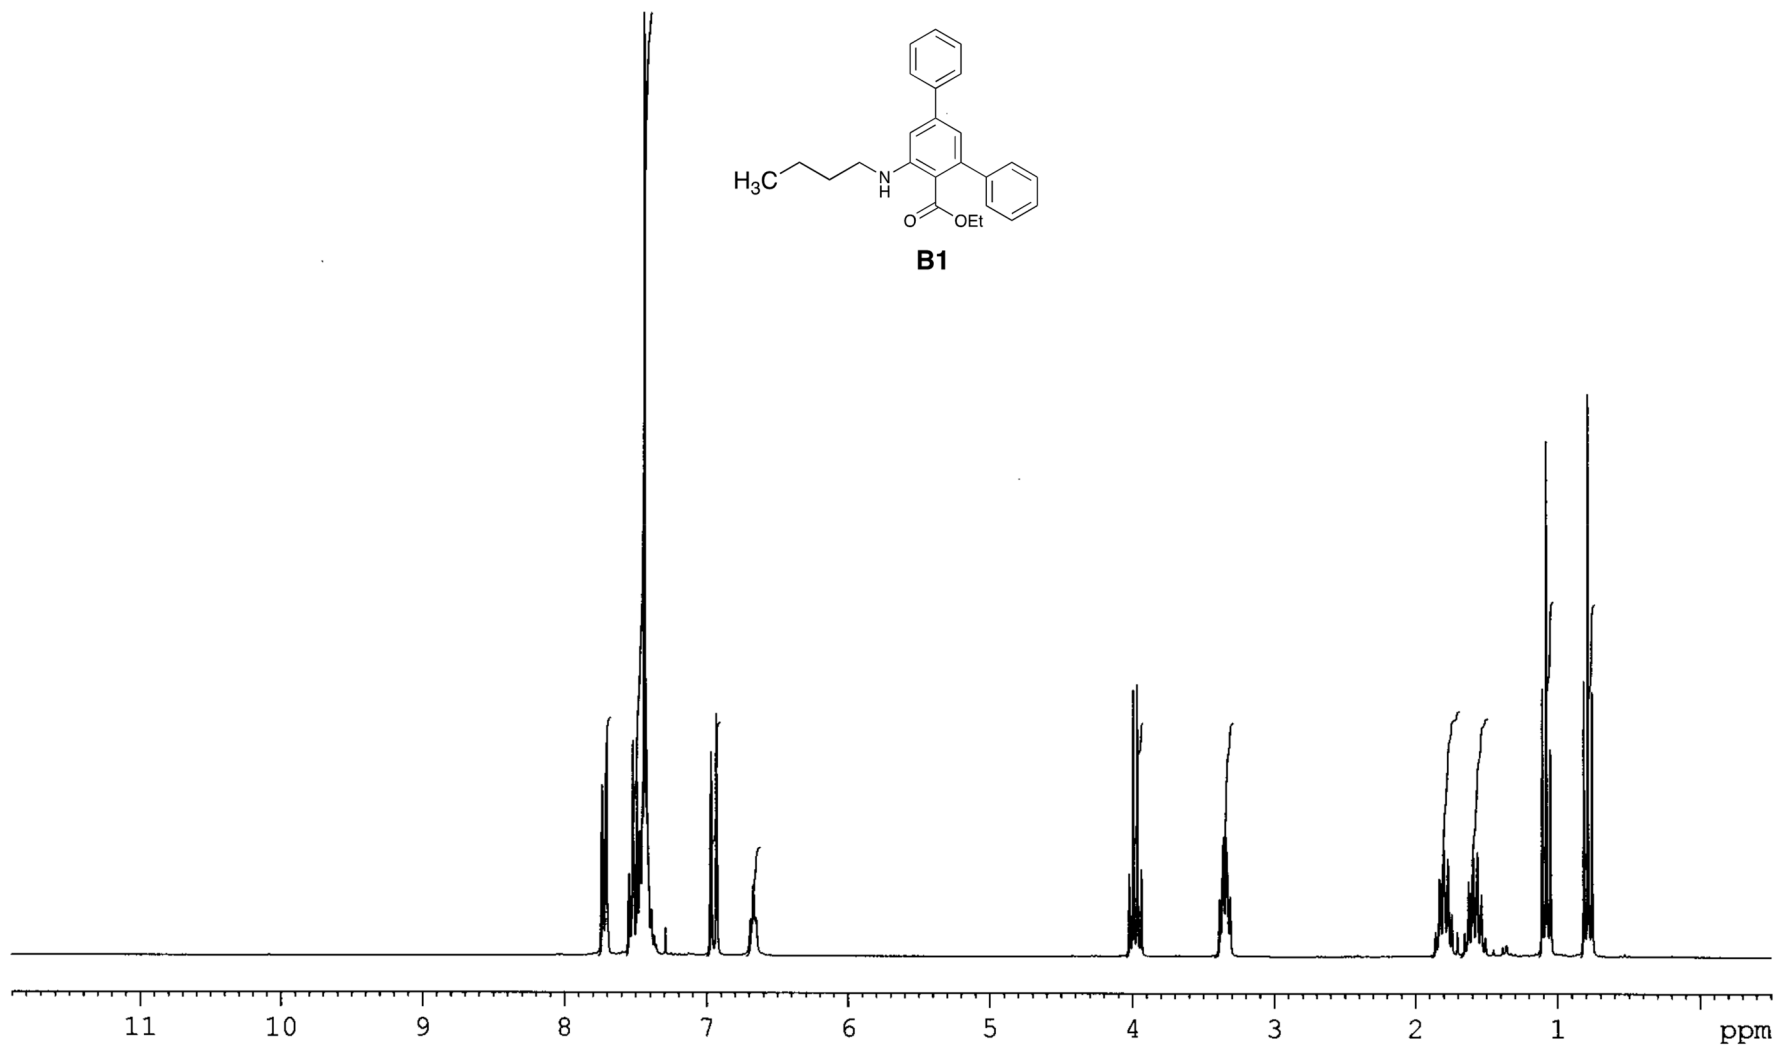

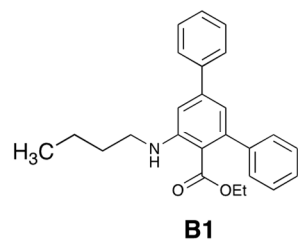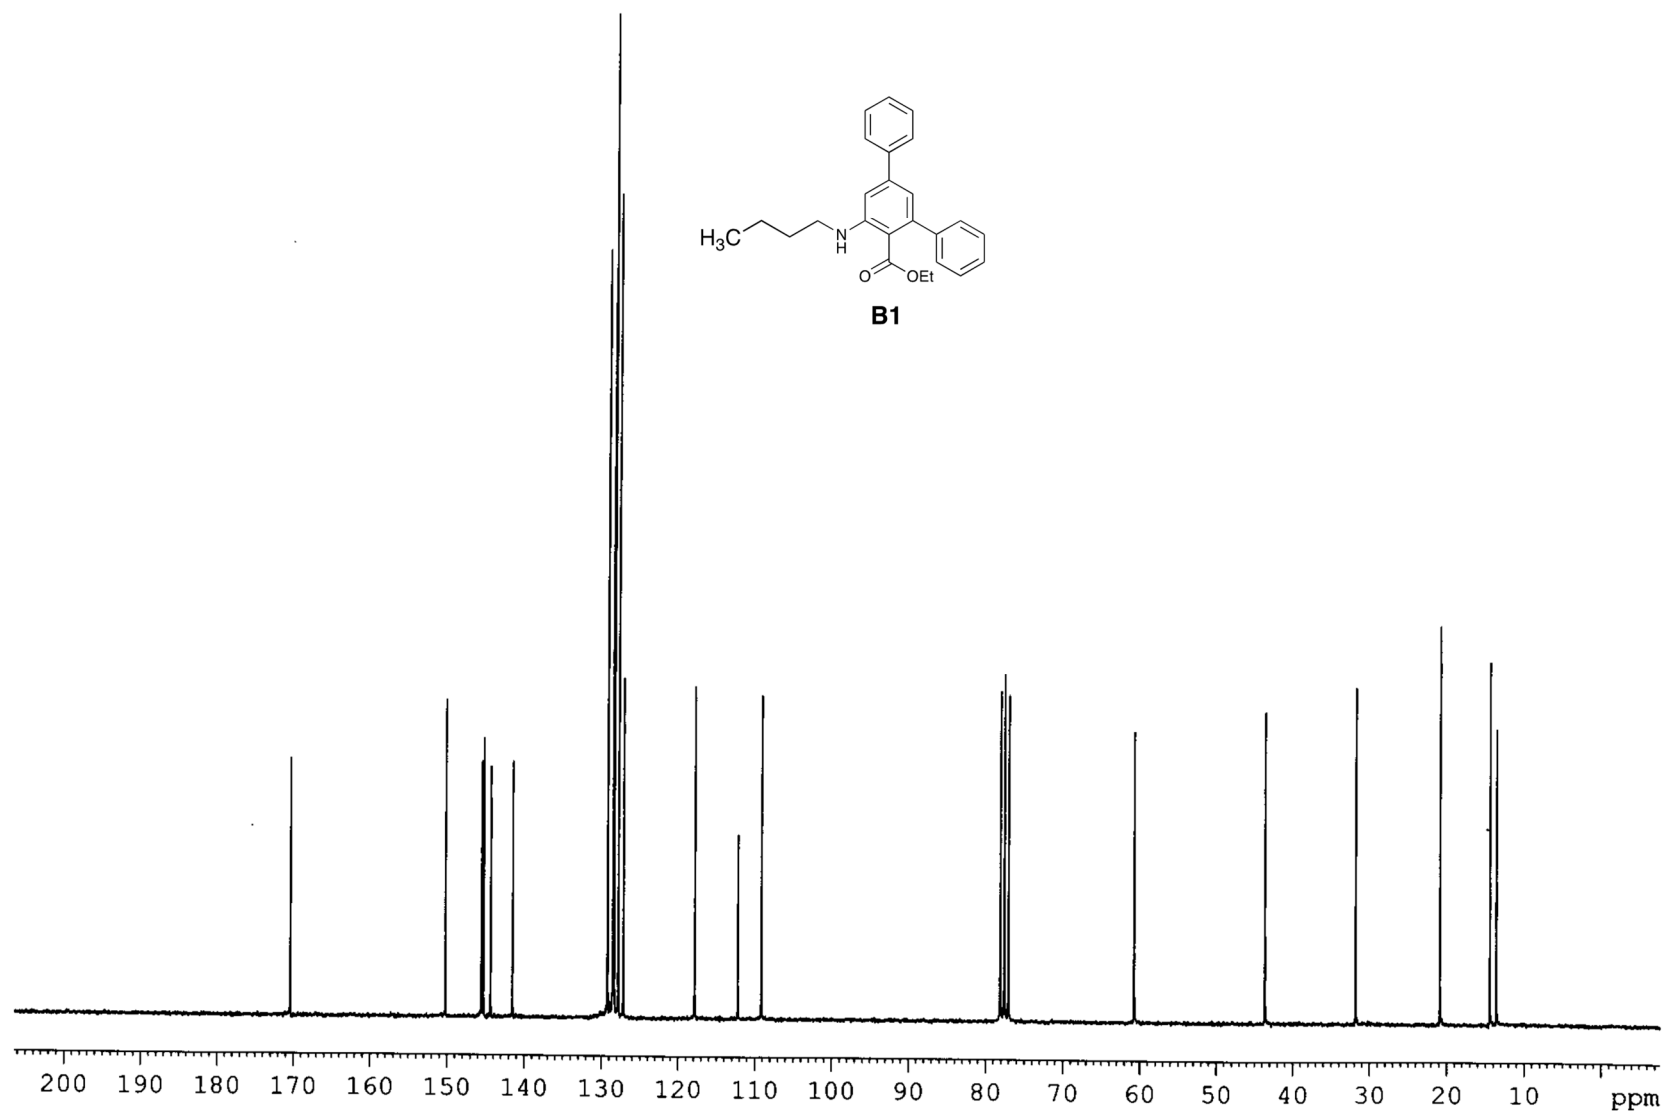

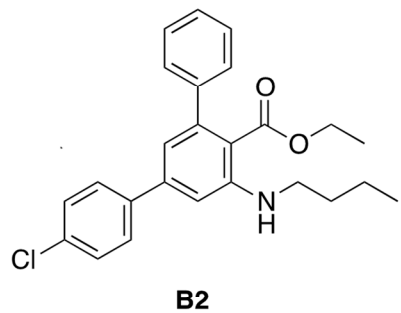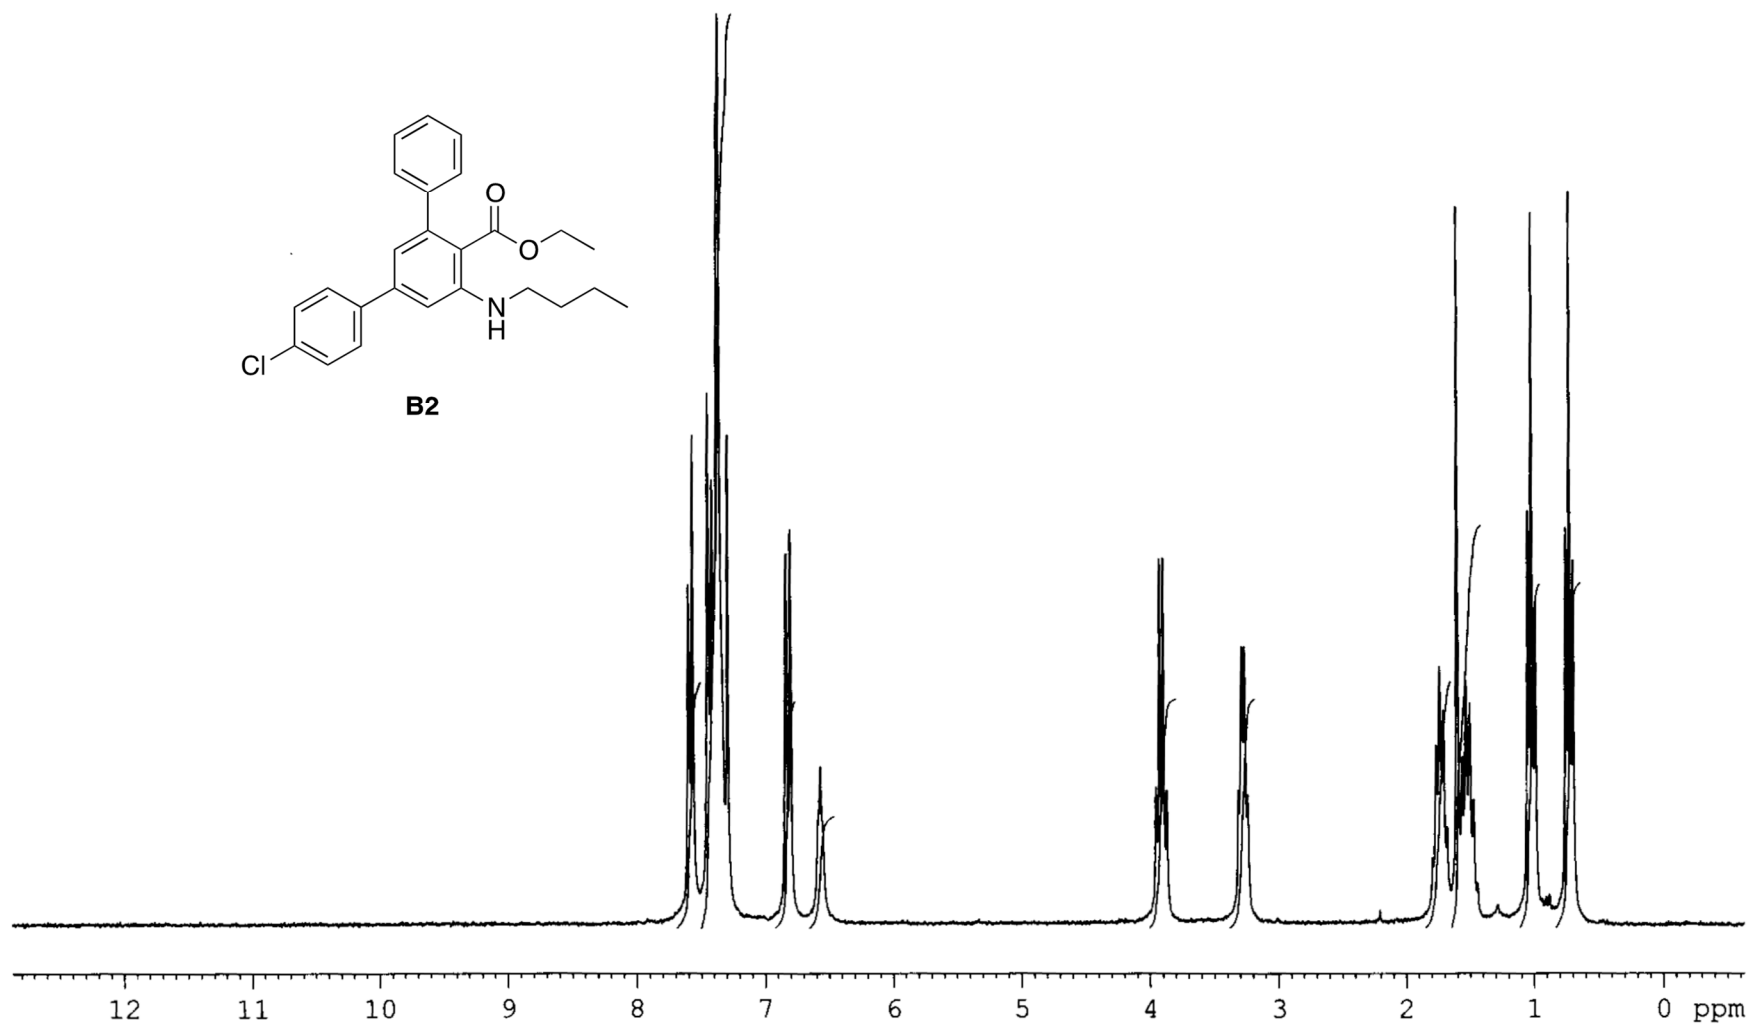



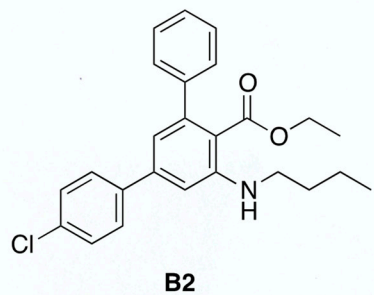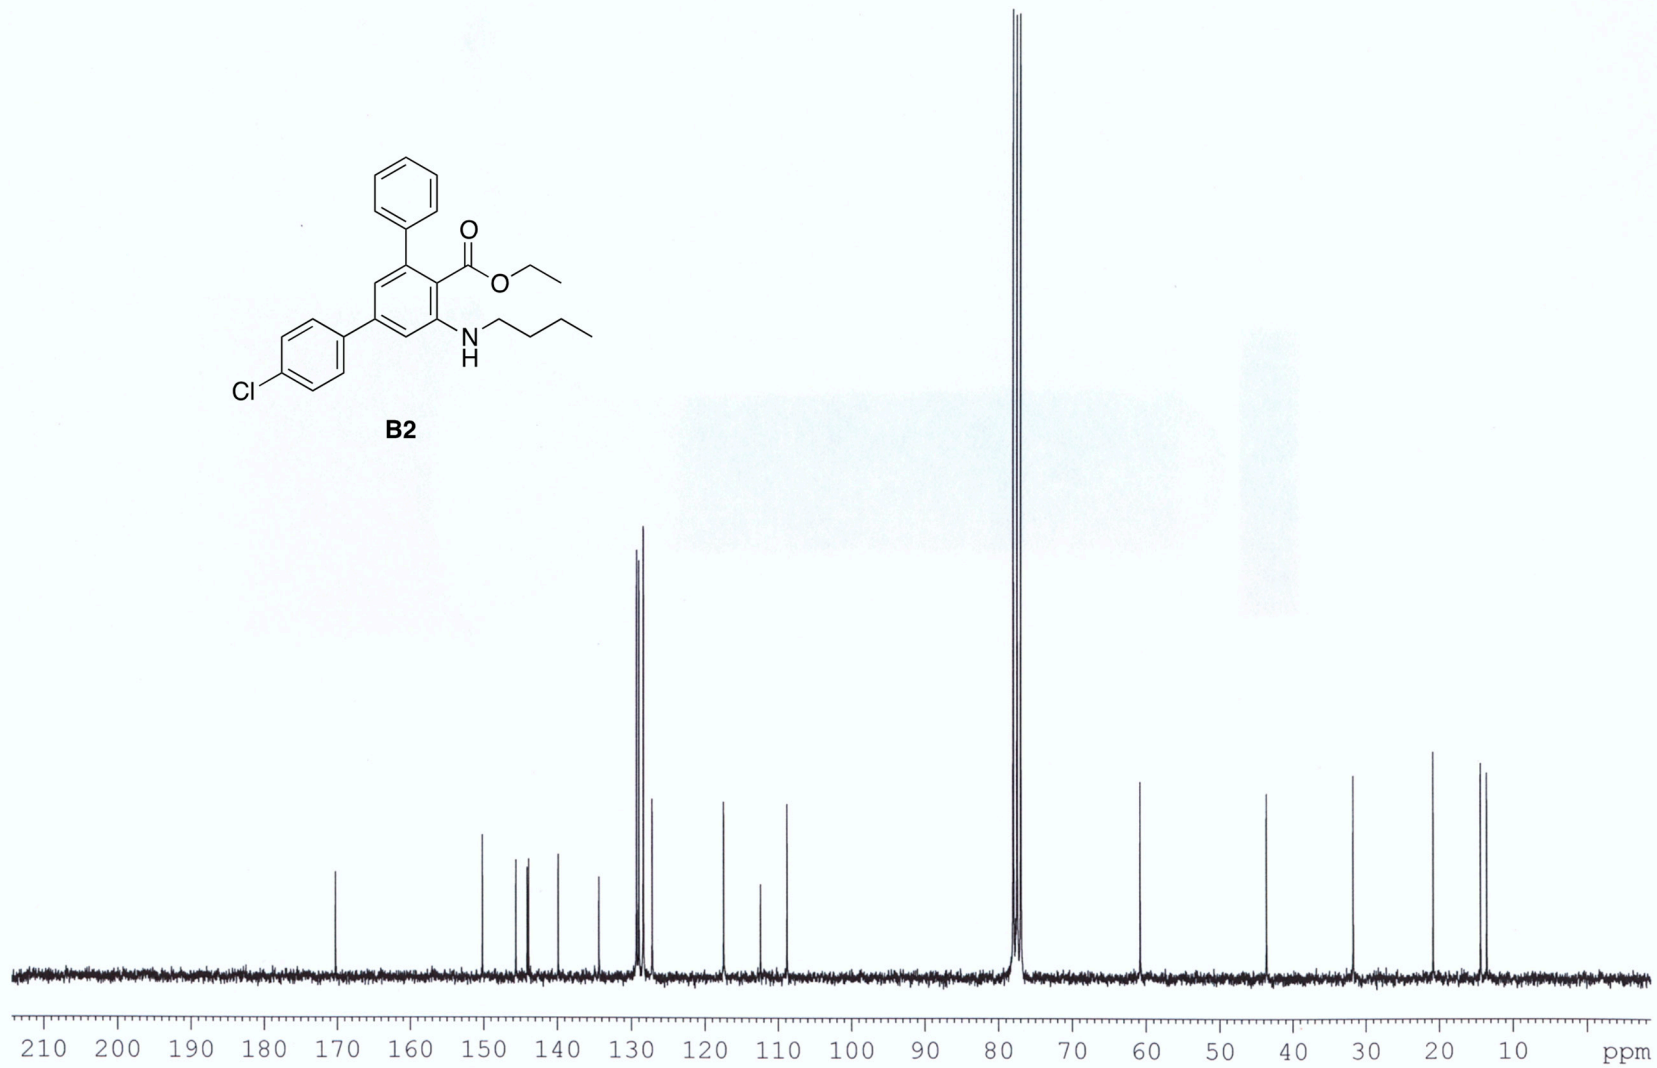

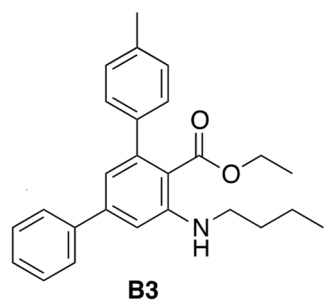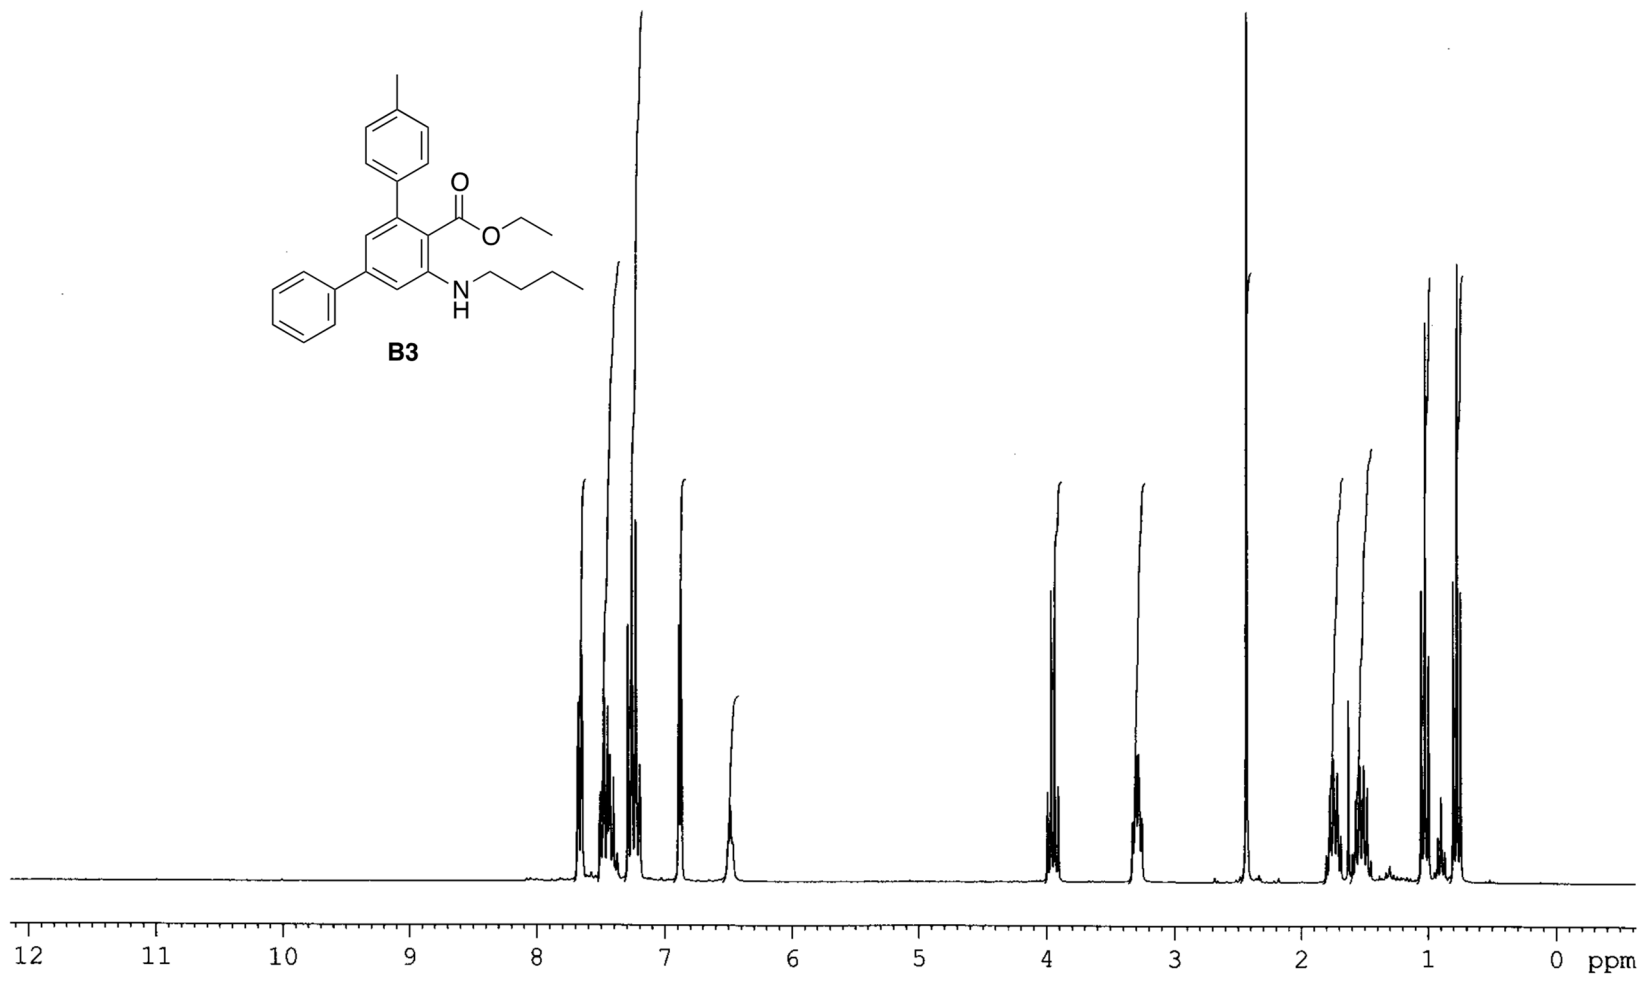

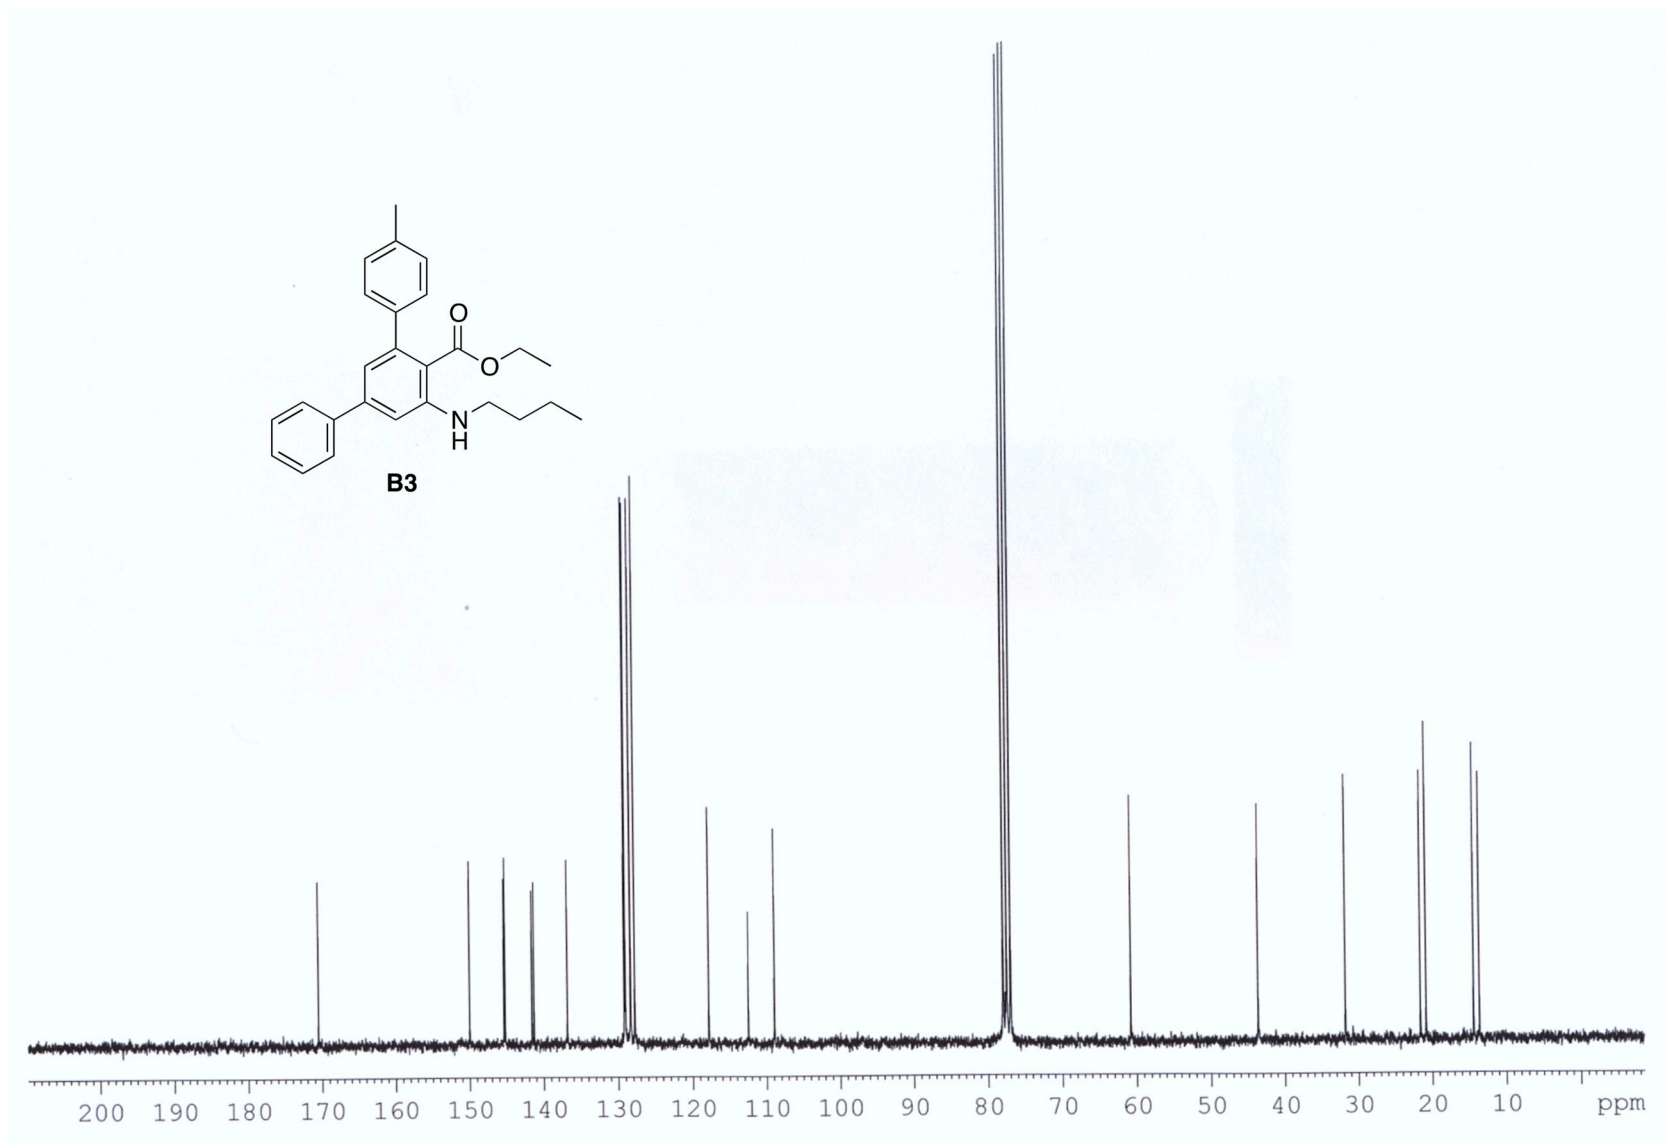

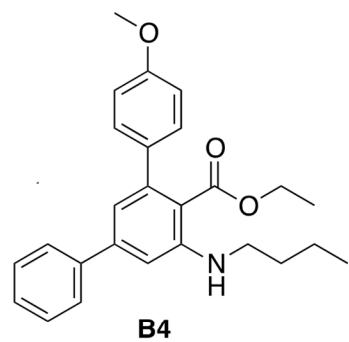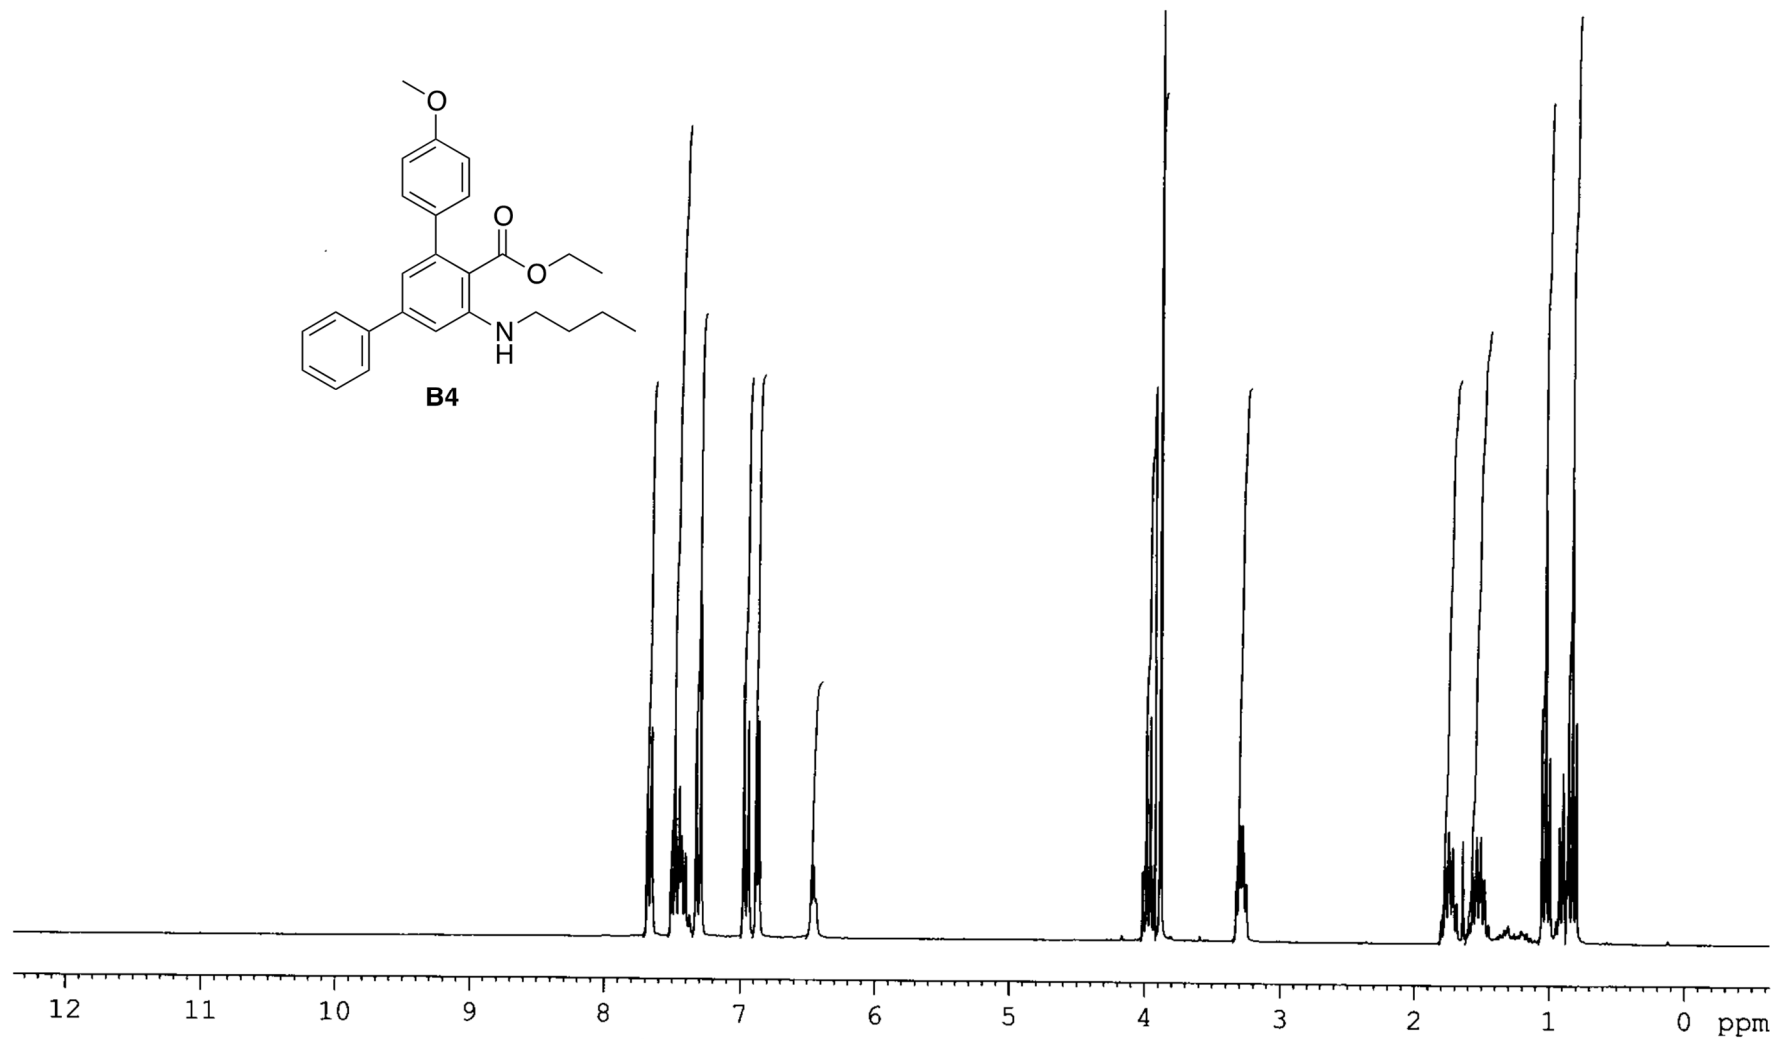

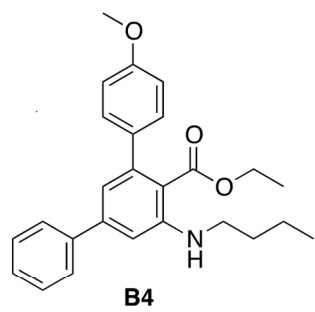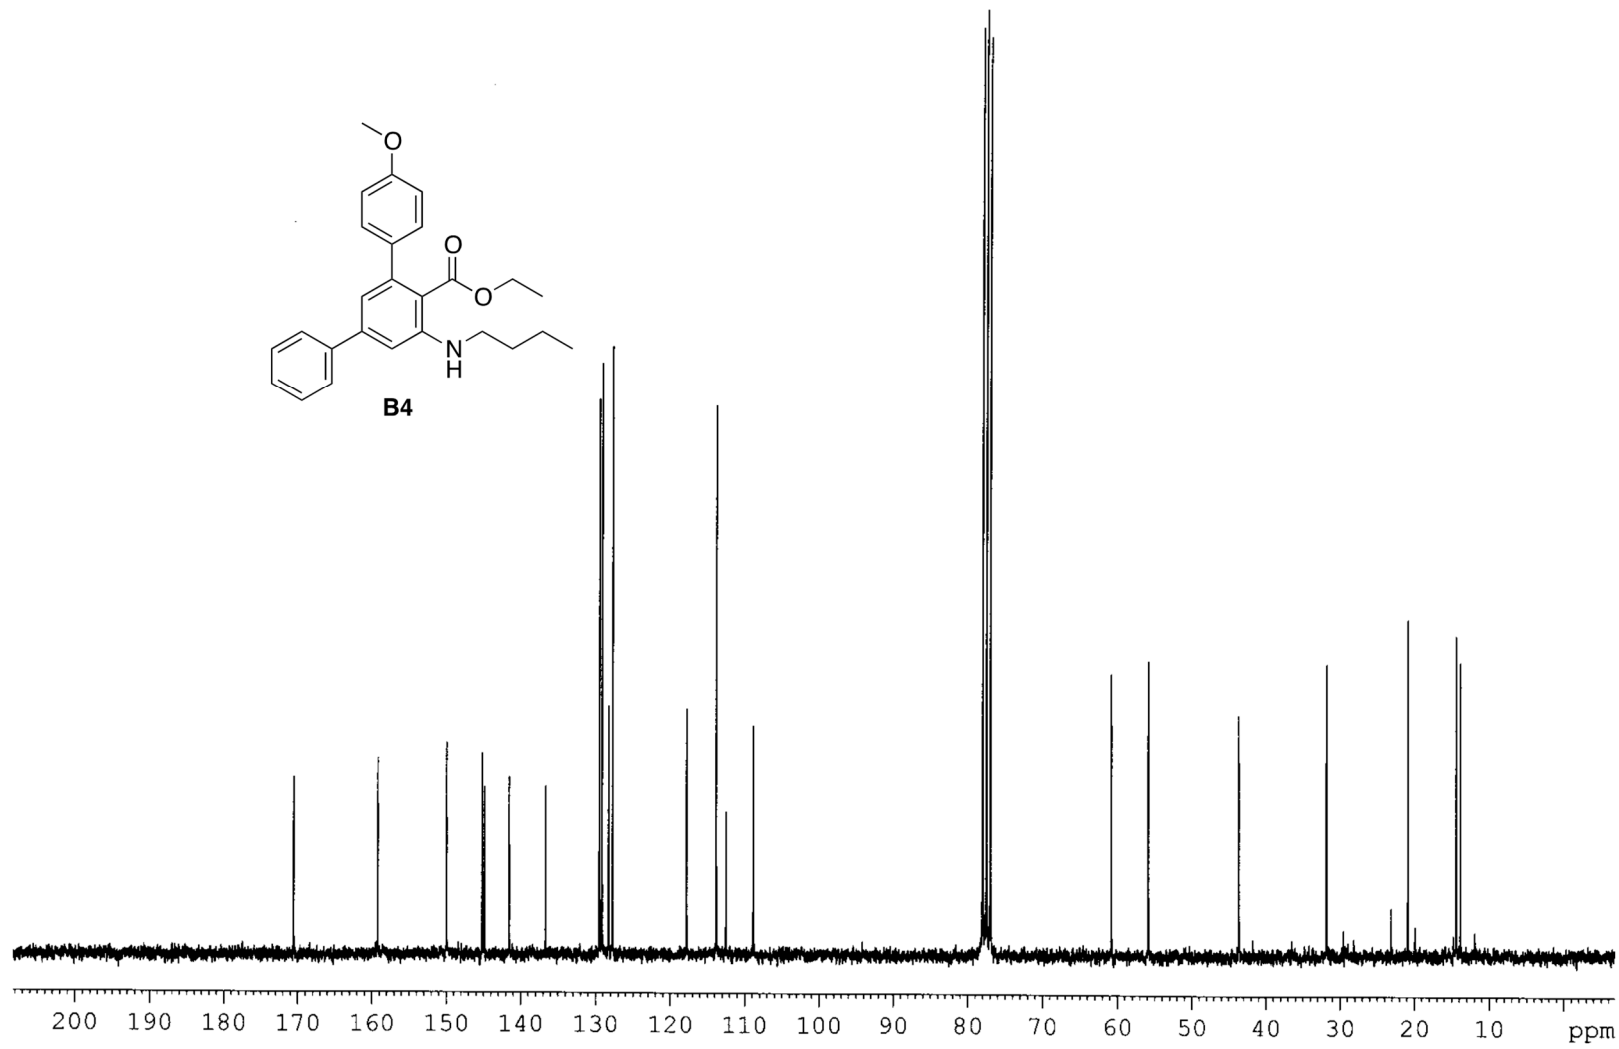

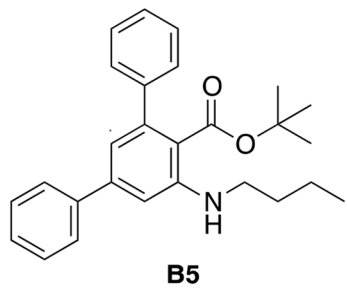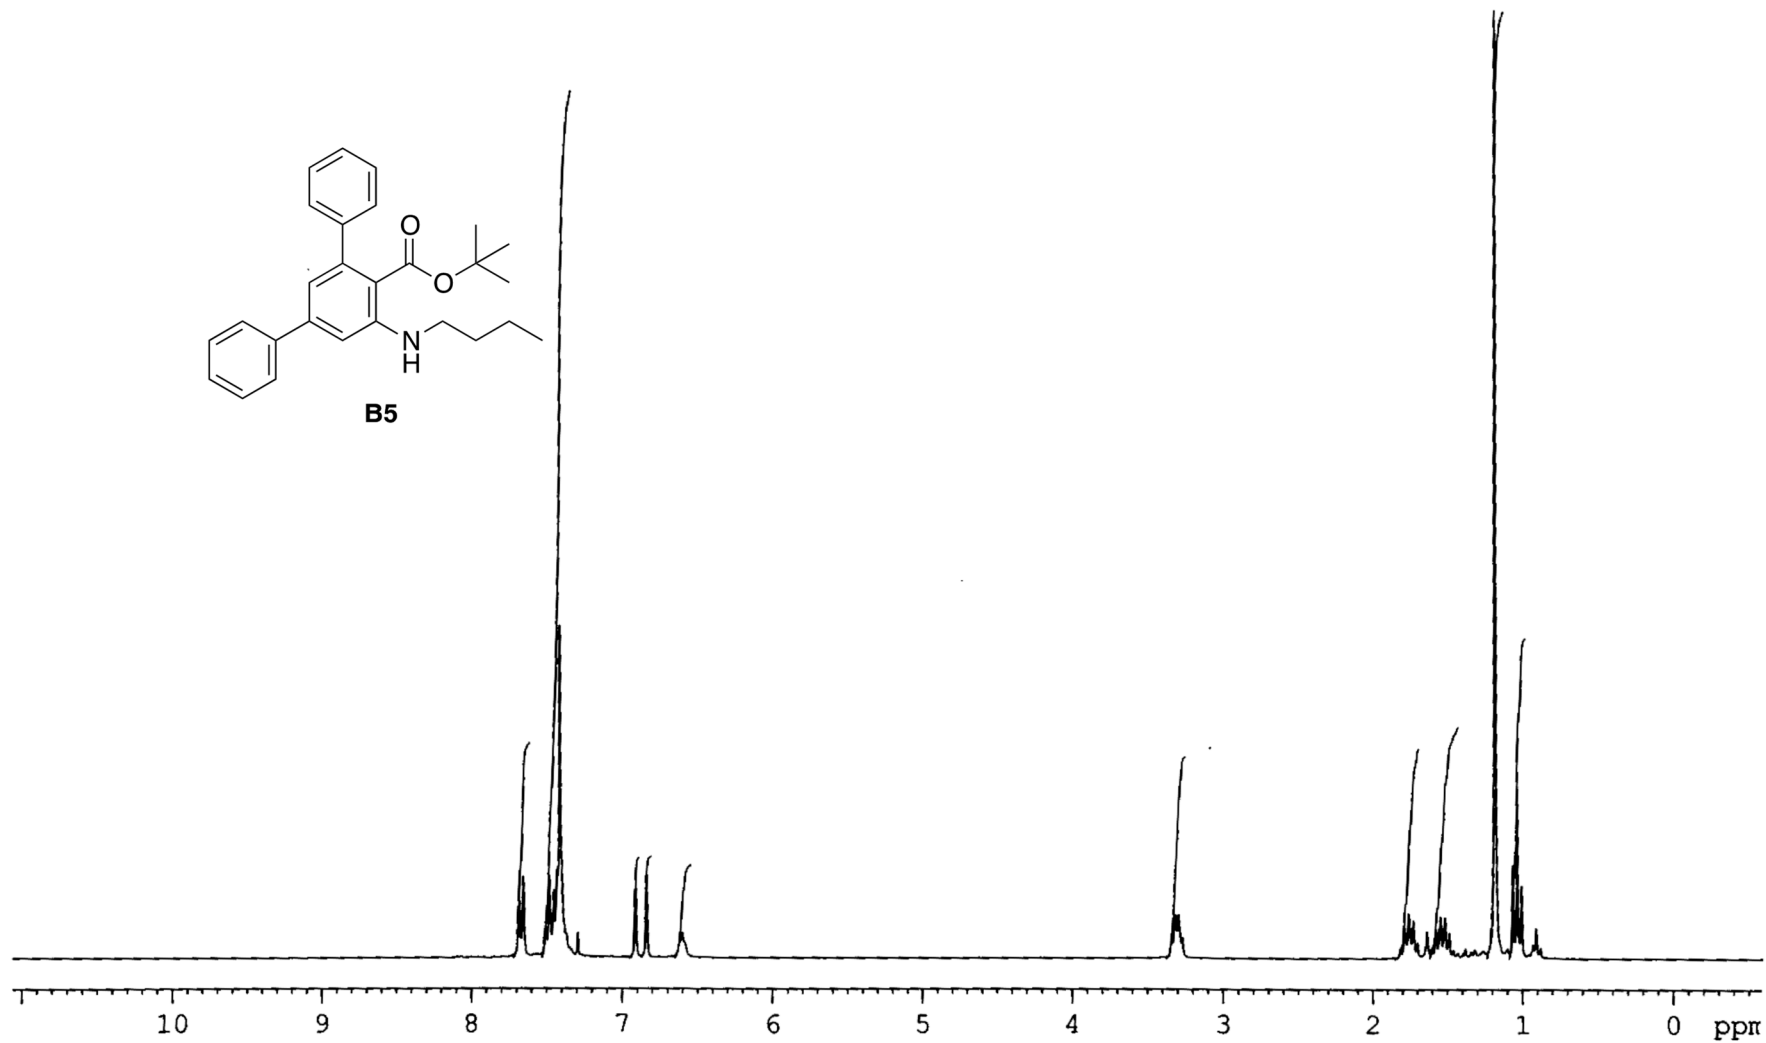

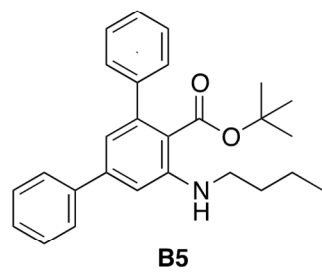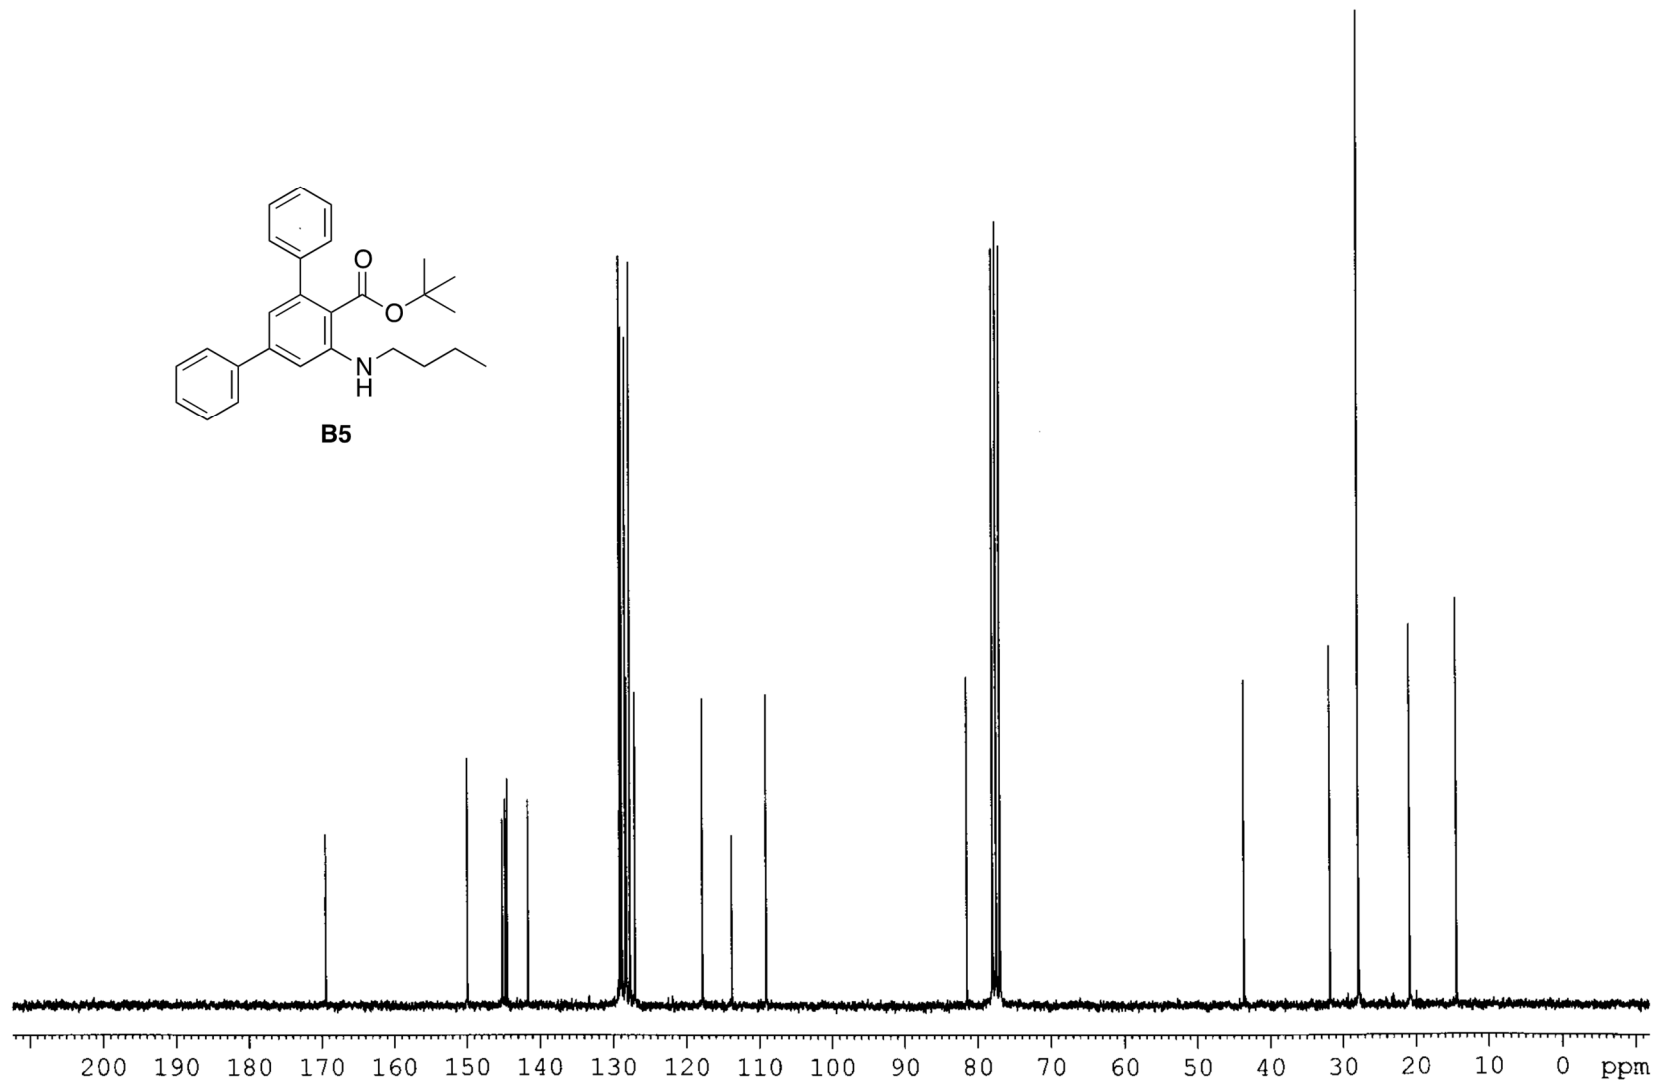

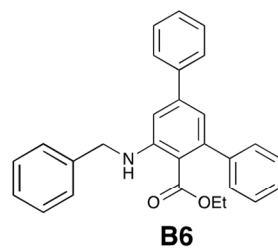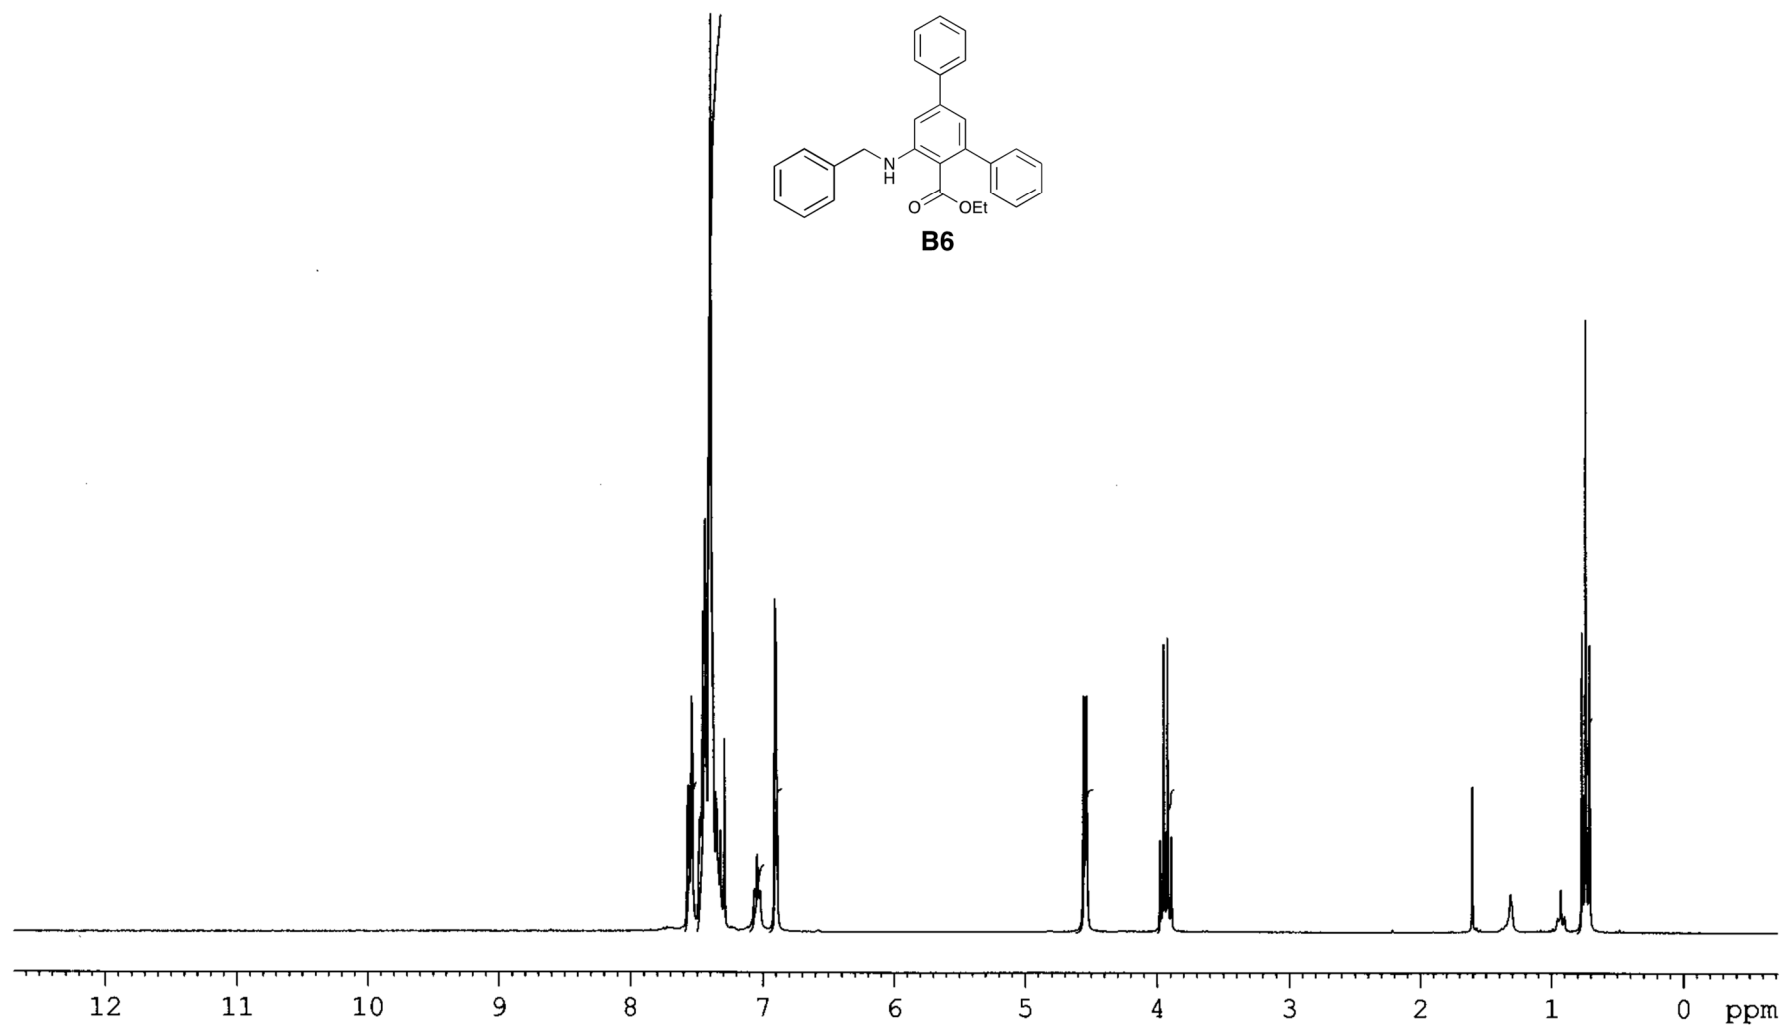



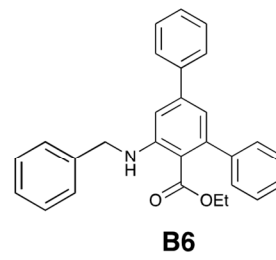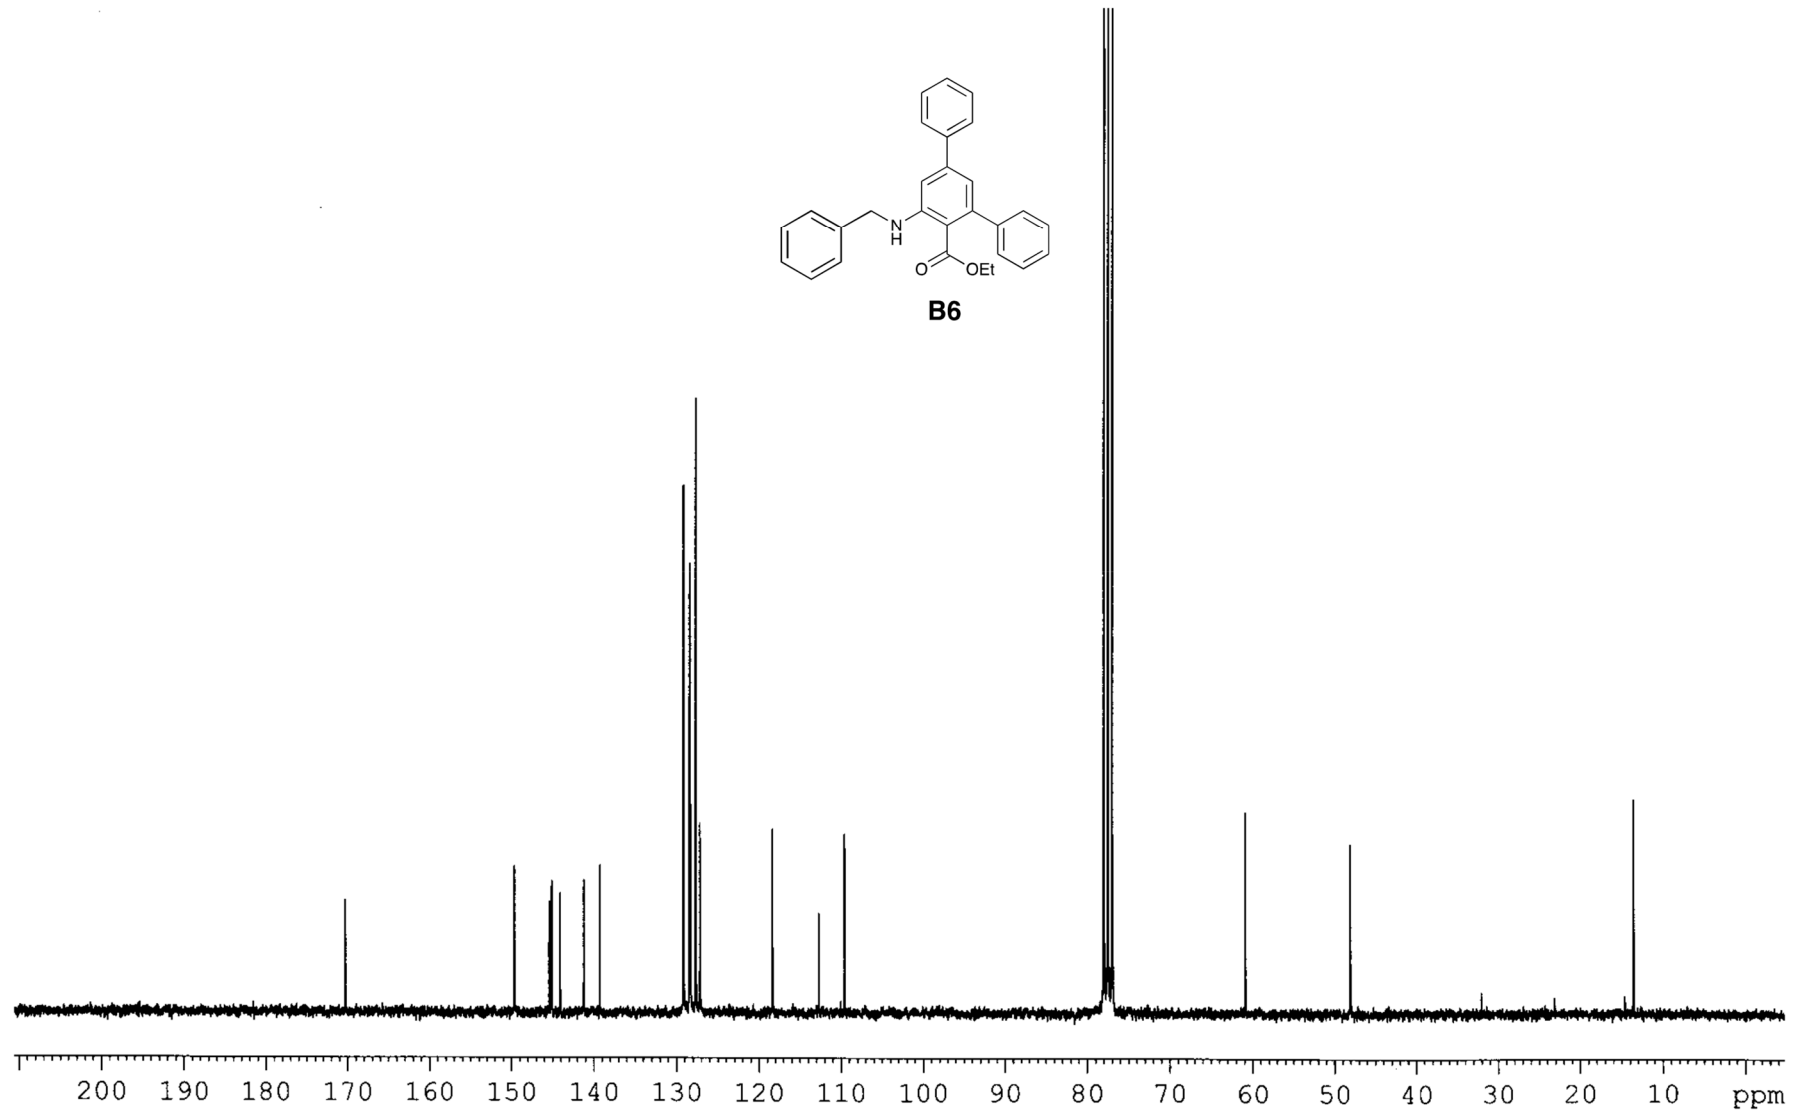

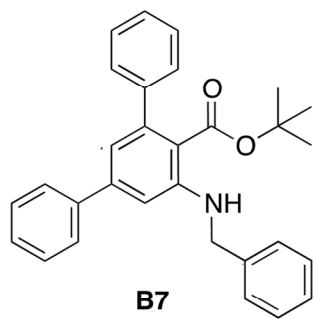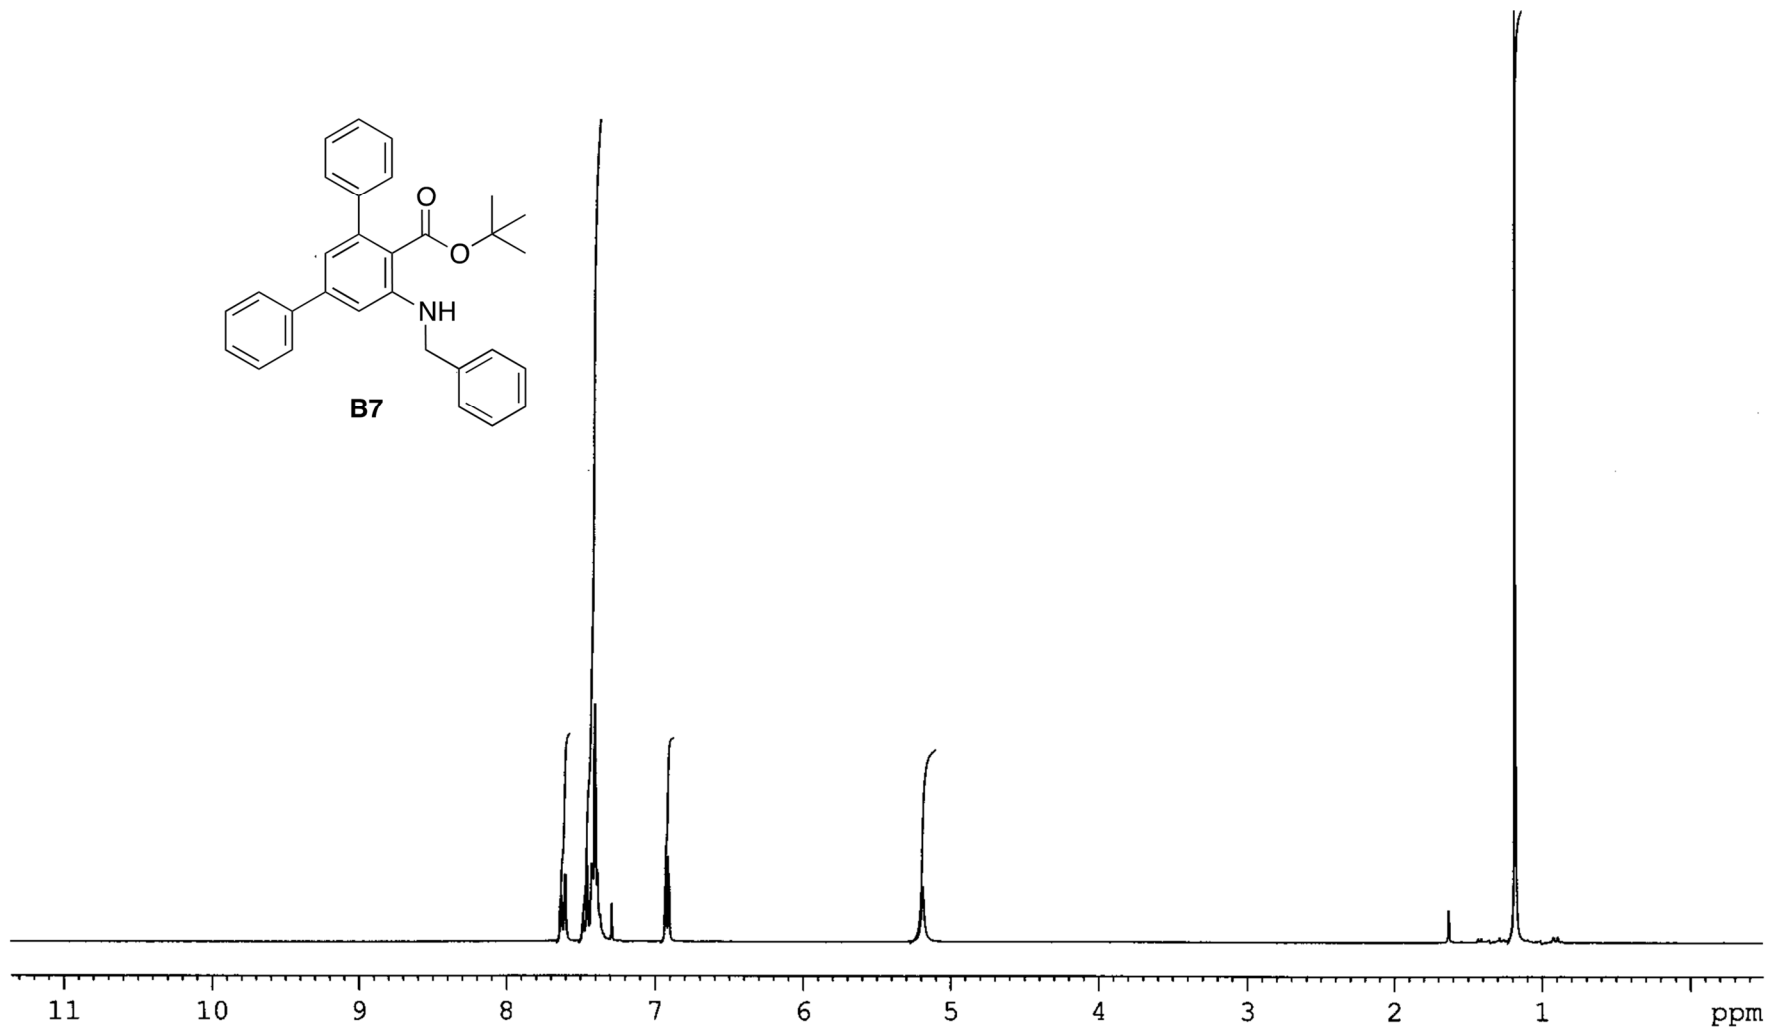

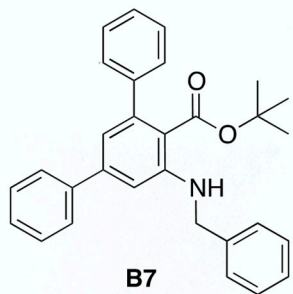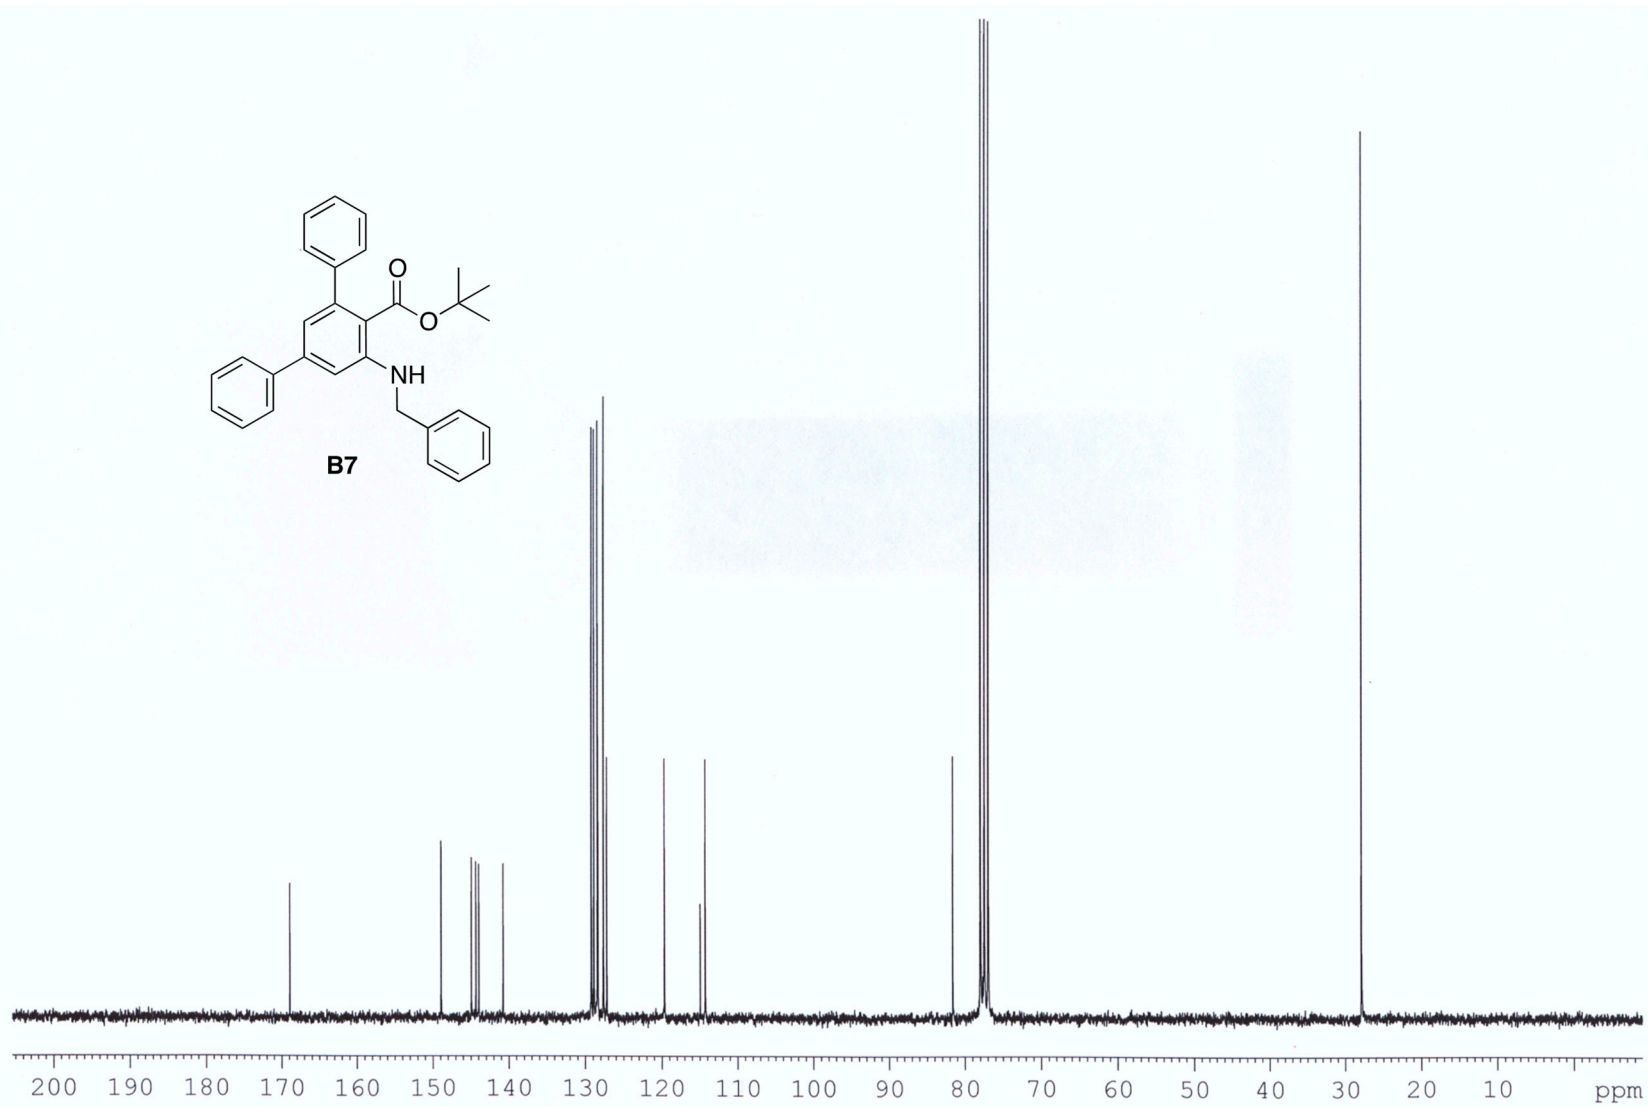

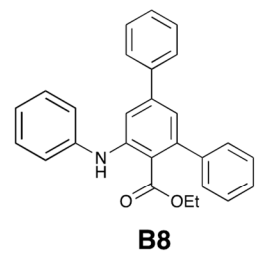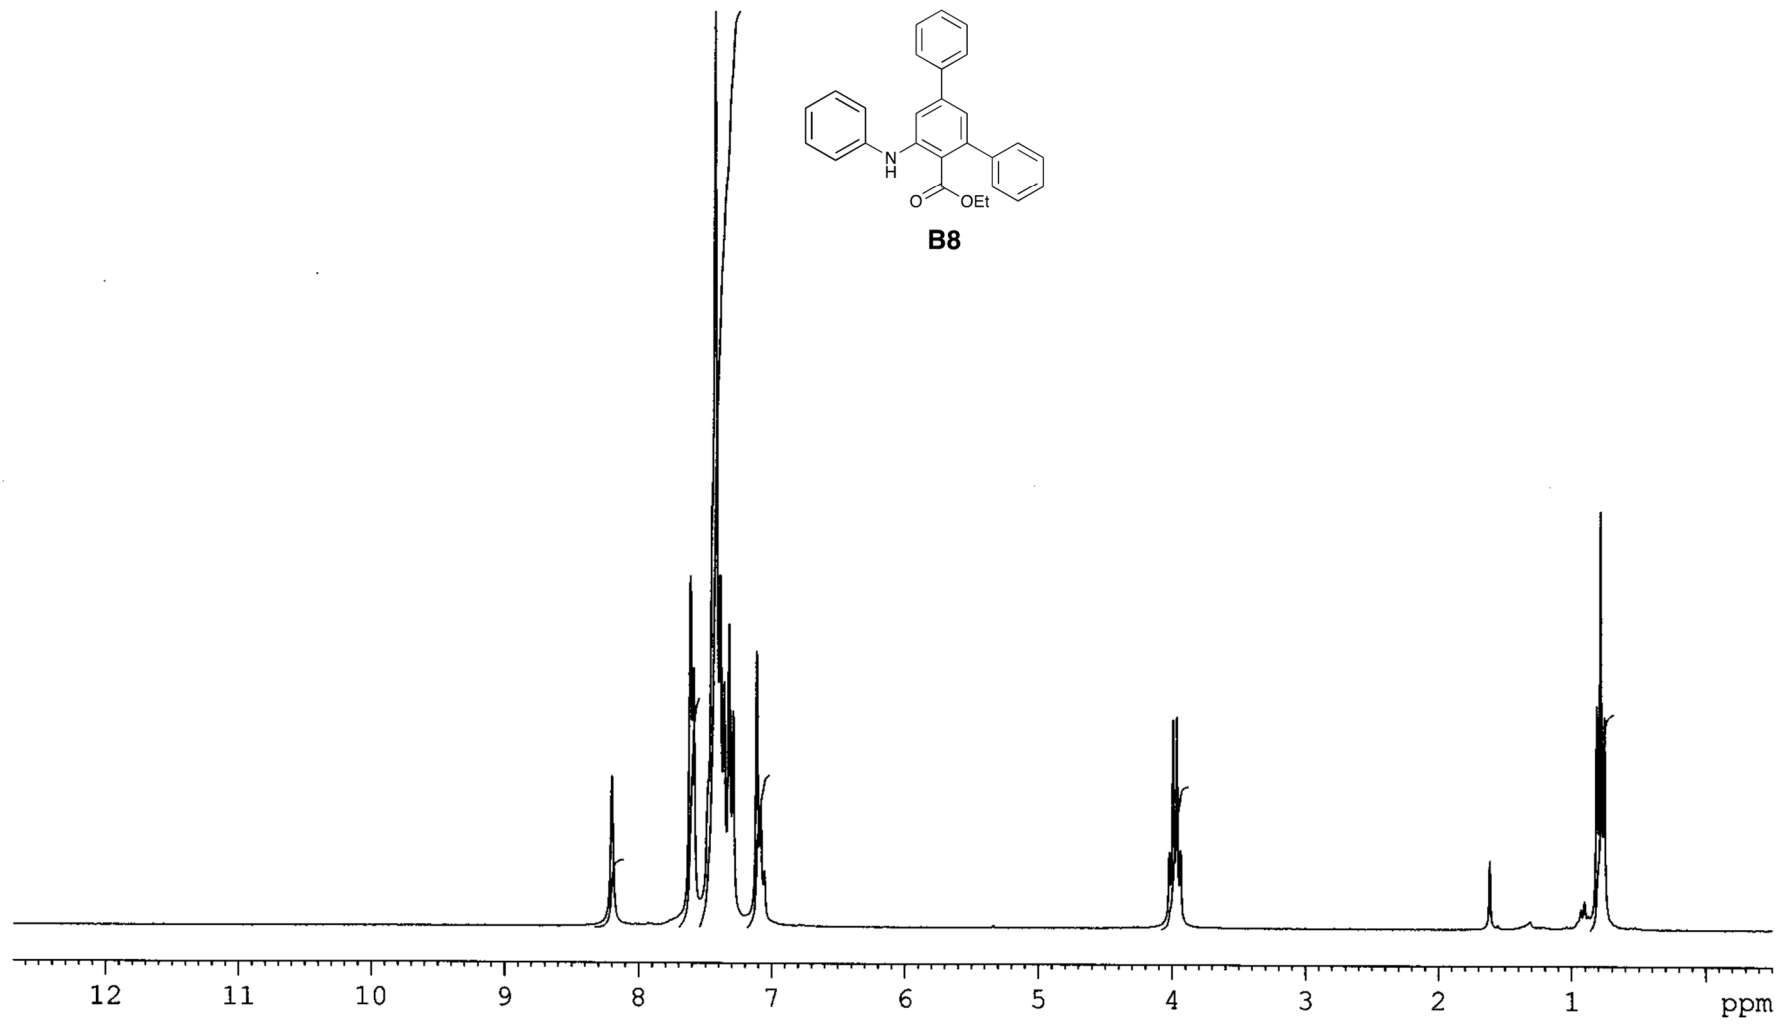

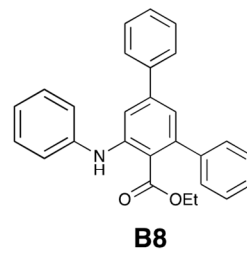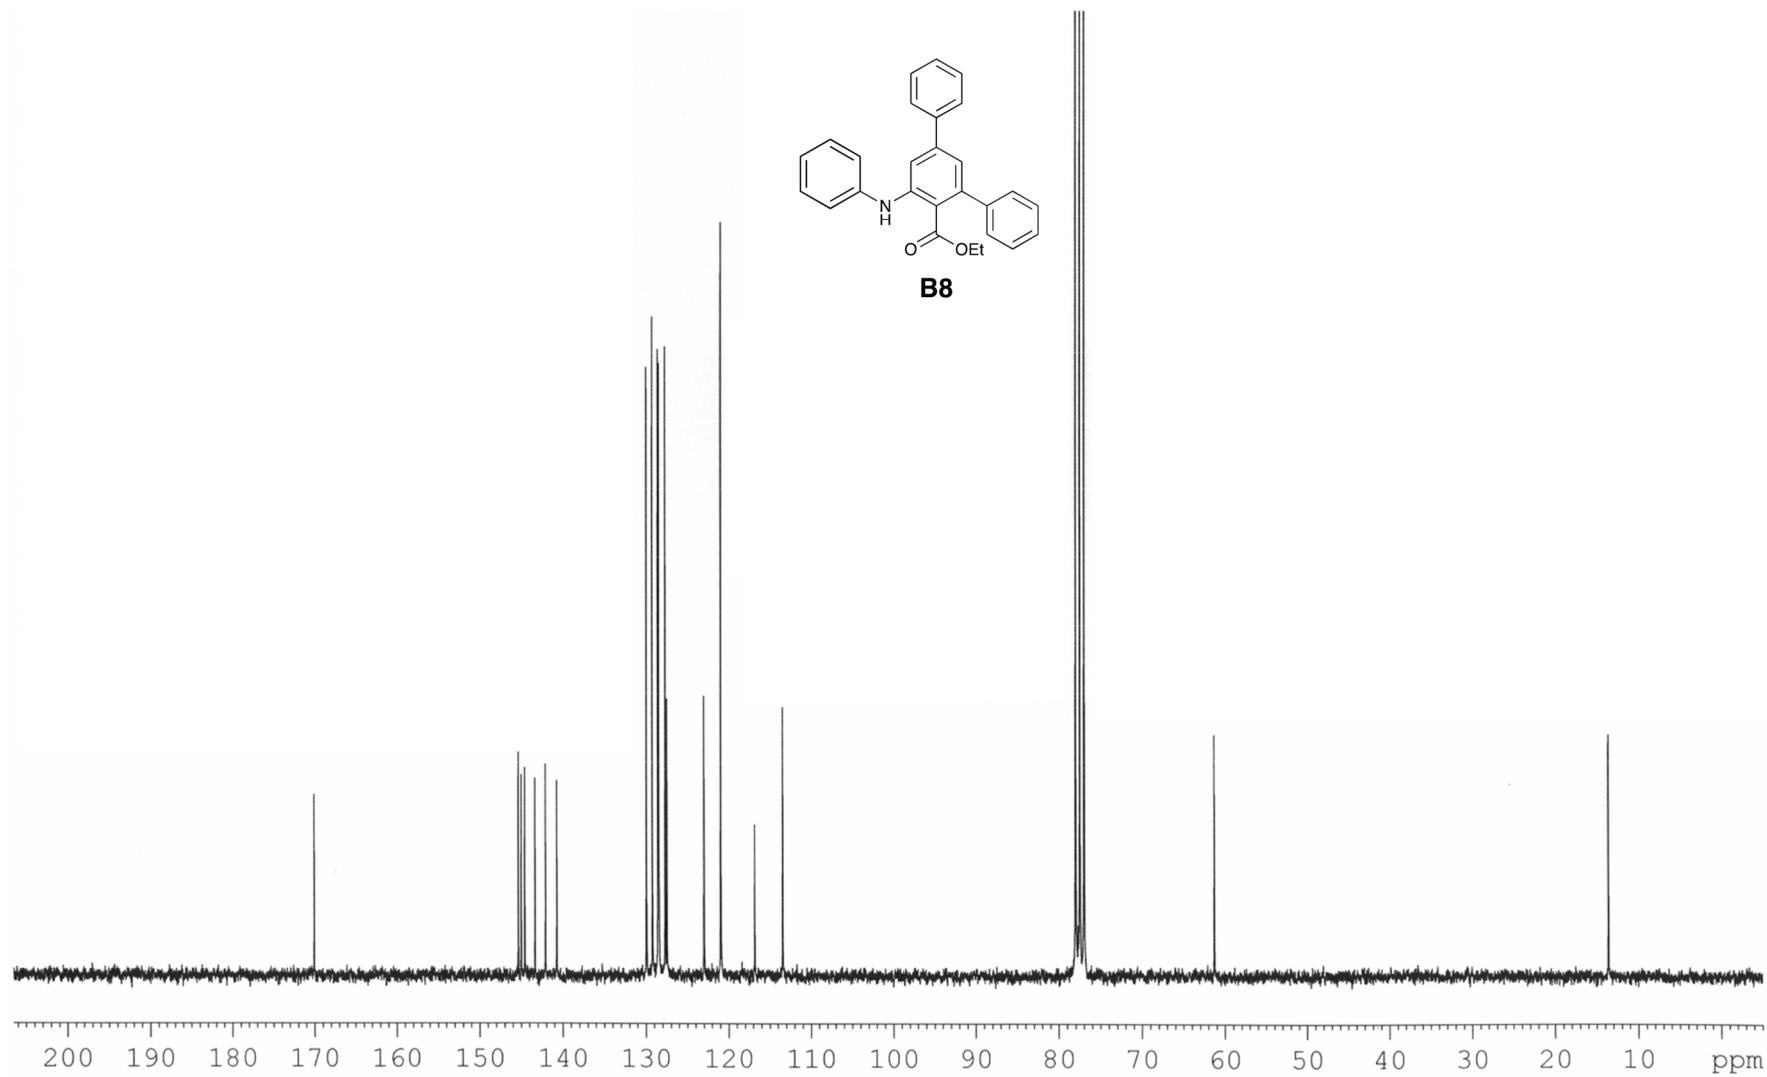

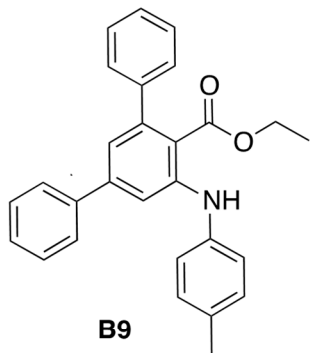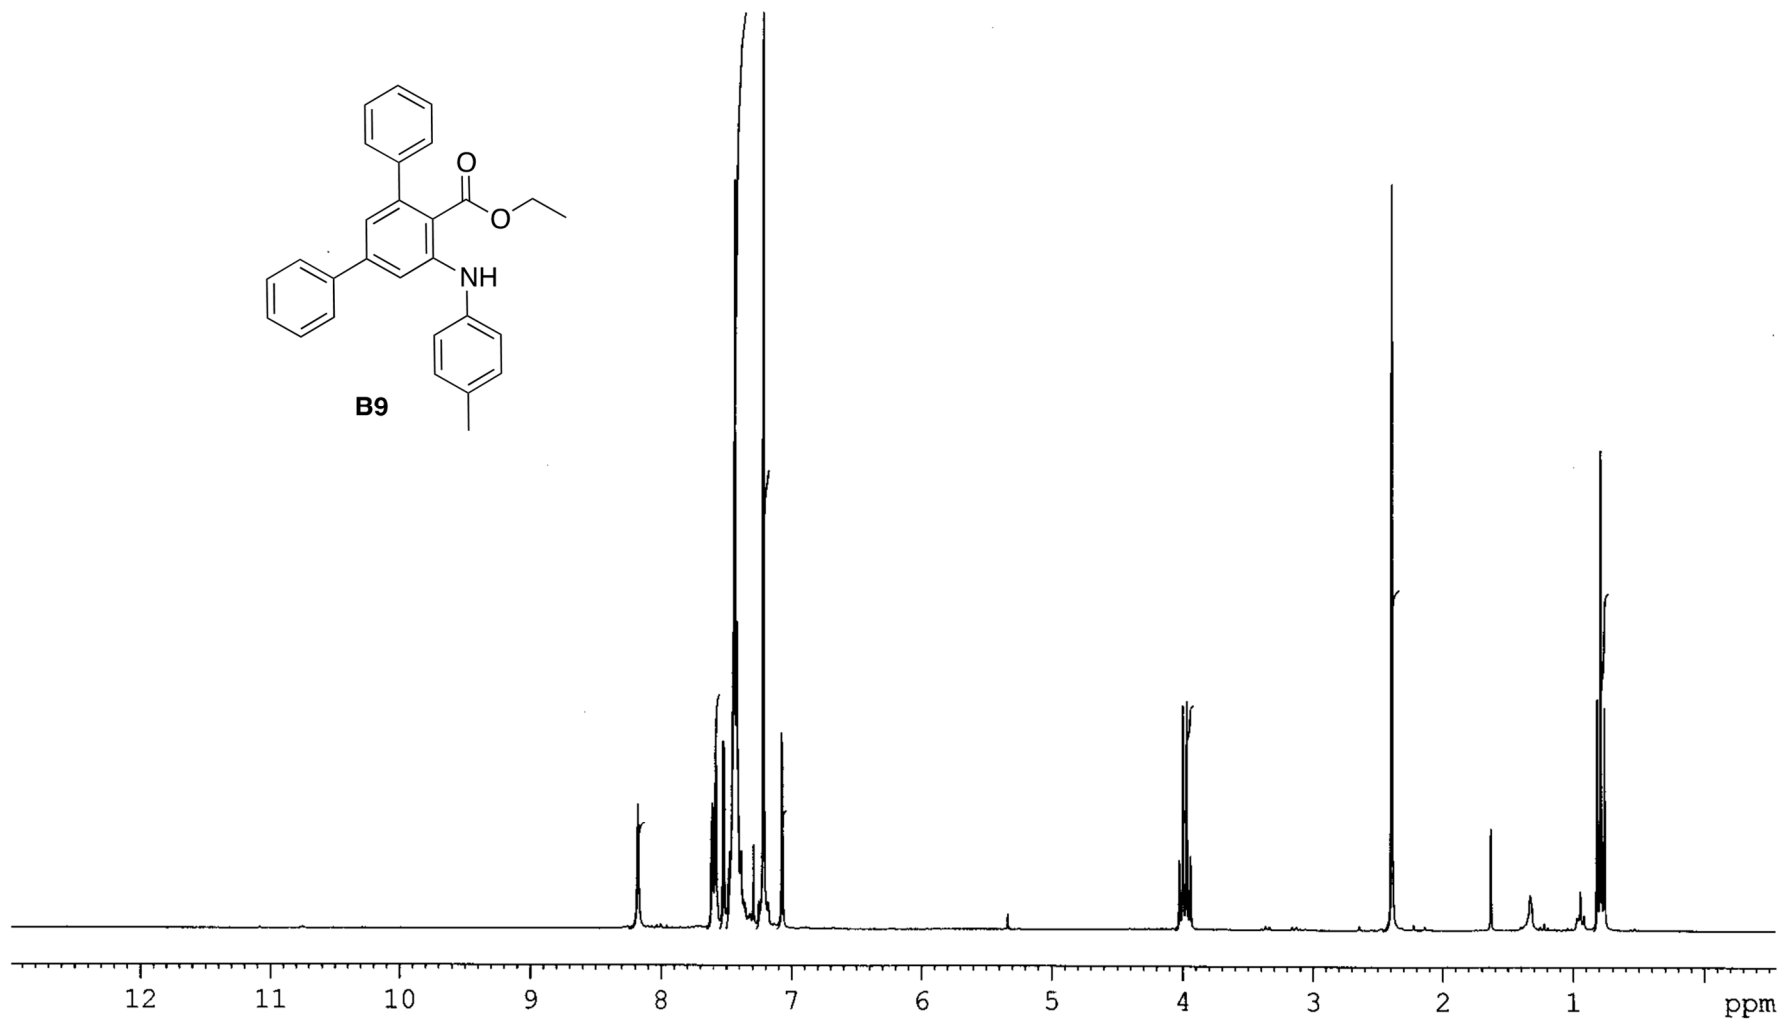

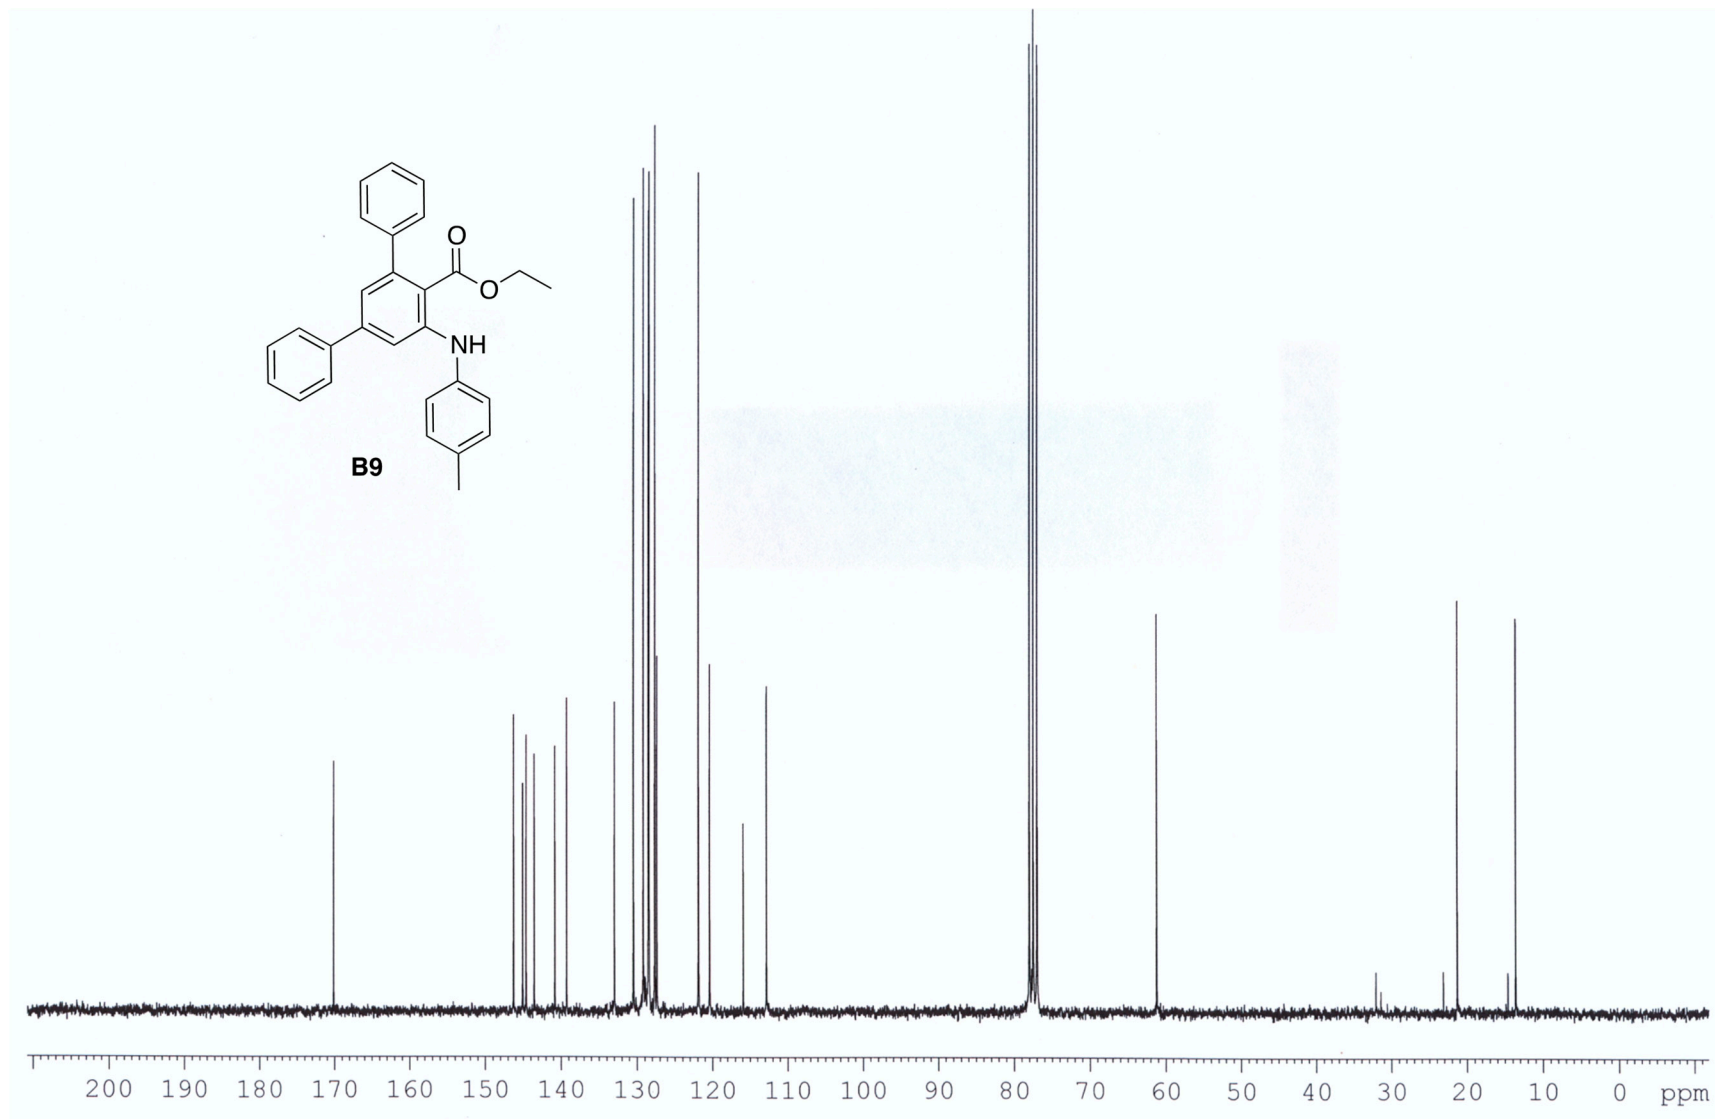

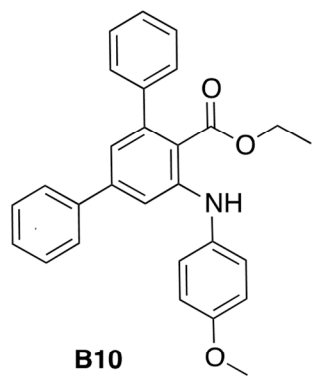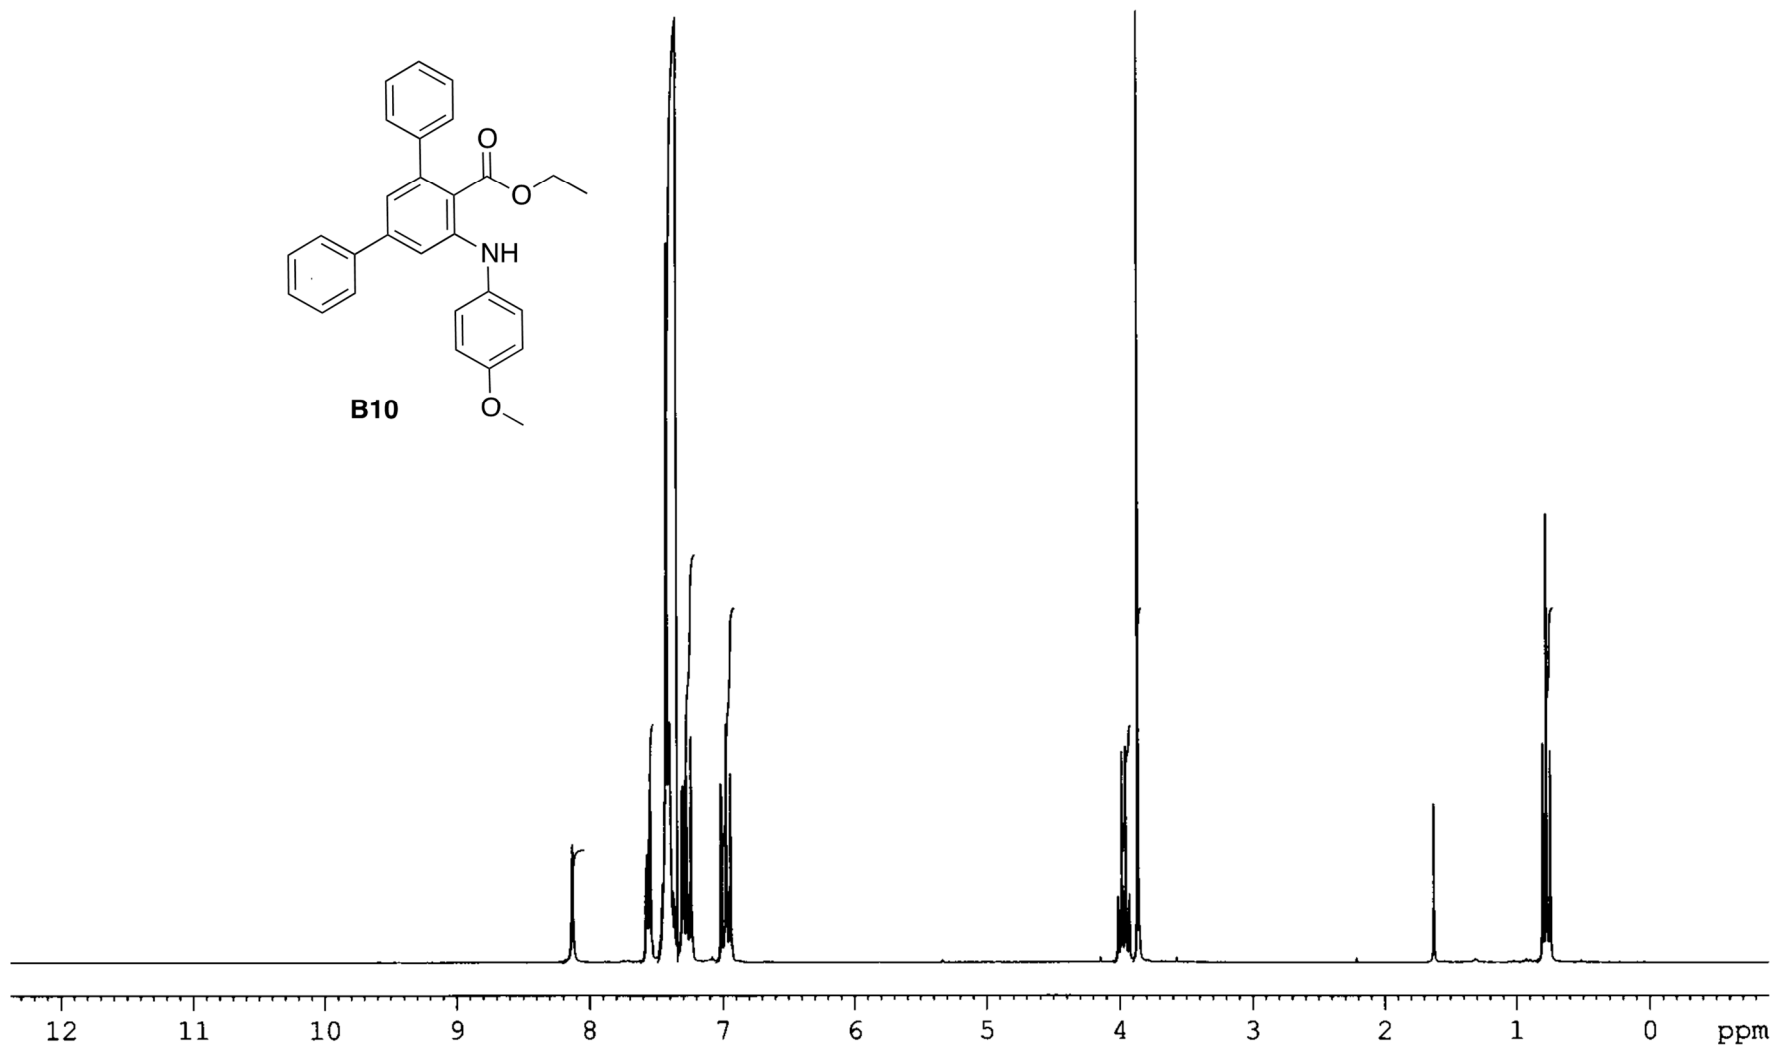



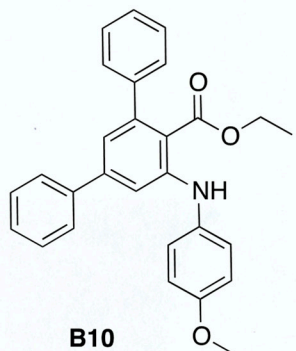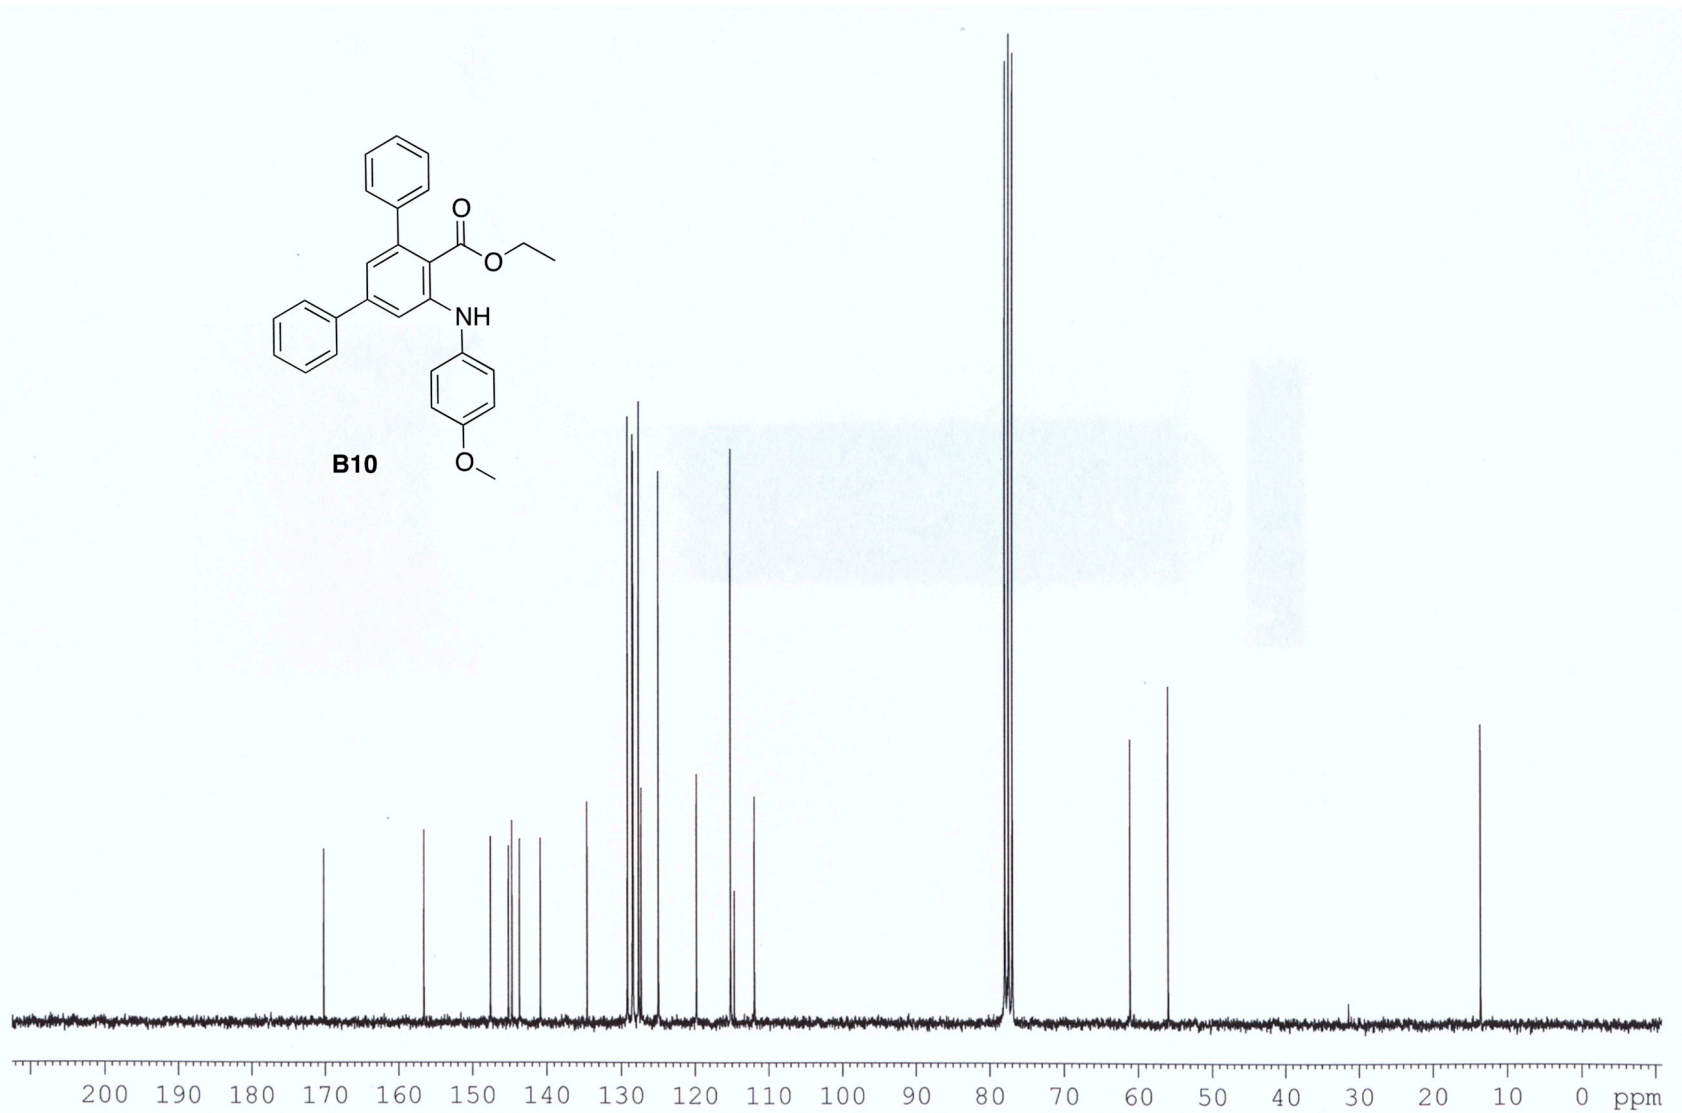

## 2. Spectroscopic study of compounds B

Table 1. UV-Visible absorption properties of compounds B<sup>a</sup>

| Comp.      | <i>Cyclohexane</i>    |                                                                 | <i>Ethanol</i>        |                                                                 | <i>Acetonitrile</i>   |                                                                 |
|------------|-----------------------|-----------------------------------------------------------------|-----------------------|-----------------------------------------------------------------|-----------------------|-----------------------------------------------------------------|
|            | $\lambda_{\max}$ , nm | $\epsilon$ , M <sup>-1</sup> cm <sup>-1</sup> (log $\epsilon$ ) | $\lambda_{\max}$ , nm | $\epsilon$ , M <sup>-1</sup> cm <sup>-1</sup> (log $\epsilon$ ) | $\lambda_{\max}$ , nm | $\epsilon$ , M <sup>-1</sup> cm <sup>-1</sup> (log $\epsilon$ ) |
| <b>B1</b>  | 244                   | 36100 (4.56)                                                    | 244                   | 40100 (4.60)                                                    | 244                   | 38400 (4.58)                                                    |
|            | 367                   | 4100 (3.61)                                                     | 364                   | 4900 (3.69)                                                     | 364                   | 3700 (3.57)                                                     |
| <b>B2</b>  | 253                   | 44000 (4.64)                                                    | 256                   | 57000 (4.76)                                                    | 253                   | 47900 (4.68)                                                    |
|            | 368                   | 4800 (3.68)                                                     | 371                   | 6000 (3.78)                                                     | 367                   | 5800 (3.76)                                                     |
| <b>B3</b>  | 248                   | 32700 (4.51)                                                    | 250                   | 46100 (4.66)                                                    | 249                   | 38600 (4.59)                                                    |
|            | 261                   | 4100 (3.61)                                                     | 364                   | 4100 (3.61)                                                     | 361                   | 4000 (3.60)                                                     |
| <b>B4</b>  | 255                   | 46000 (4.66)                                                    | 252                   | 43400 (4.64)                                                    | 254                   | 47800 (4.68)                                                    |
|            | 363                   | 4800 (3.68)                                                     | 362                   | 4300 (3.63)                                                     | 364                   | 4500 (3.65)                                                     |
| <b>B5</b>  | 250                   | 35000 (4.54)                                                    | 247                   | 46000 (4.66)                                                    | 247                   | 42000 (4.62)                                                    |
|            | 369                   | 2800 (3.45)                                                     | 364                   | 4500 (3.65)                                                     | 364                   | 4100 (3.61)                                                     |
| <b>B6</b>  | 245                   | 47000 (4.67)                                                    | 245                   | 45000 (4.65)                                                    | 245                   | 54000 (4.73)                                                    |
|            | 362                   | 3100 (3.49)                                                     | 359                   | 3700 (3.57)                                                     | 359                   | 4000 (3.60)                                                     |
| <b>B7</b>  | 242                   | 41200 (4.61)                                                    | 245                   | 48000 (4.68)                                                    | 245                   | 38000 (4.58)                                                    |
|            | 362                   | 3600 (3.56)                                                     | 359                   | 3500 (3.54)                                                     | 359                   | 3900 (3.59)                                                     |
|            | 244                   | 13400 (4.13)                                                    | 244                   | 42500 (4.63)                                                    | 244                   | 19200 (4.28)                                                    |
| <b>B8</b>  | 271                   | 11800 (4.07)                                                    | 271                   | 34500 (4.54)                                                    | 274                   | 15400 (4.19)                                                    |
|            | 364                   | 3300 (3.52)                                                     | 361                   | 4300 (3.63)                                                     | 358                   | 3100 (3.49)                                                     |
|            | 246                   | 34200 (4.53)                                                    | 246                   | 53900 (4.73)                                                    | 247                   | 36800 (4.57)                                                    |
| <b>B9</b>  | 273                   | 27100 (4.43)                                                    | 274                   | 47400 (4.68)                                                    | 271                   | 28700 (4.46)                                                    |
|            | 364                   | 5100 (3.71)                                                     | 364                   | 4300 (3.63)                                                     | 362                   | 4700 (3.67)                                                     |
|            | 246                   | 58900 (4.77)                                                    | 246                   | 54100 (4.73)                                                    | 247                   | 49900 (4.70)                                                    |
| <b>B10</b> | 273                   | 47100 (4.67)                                                    | 270                   | 33000 (4.52)                                                    | 270                   | 37000 (4.57)                                                    |
|            | 364                   | 4100 (3.61)                                                     | 366                   | 3700 (3.57)                                                     | 362                   | 3800 (3.58)                                                     |

<sup>a</sup> $\lambda_{\max}$ : maximum absorption wavelength;  $\epsilon$ : molar absorptivity (M<sup>-1</sup> cm<sup>-1</sup>) at the maximum absorption wavelength

Table 2. Fluorescence properties of compounds **B**

| Comp.      | <i>Cyclohexane</i>            |                               |                   | <i>Ethanol</i>                |                               |                   | <i>Acetonitrile</i>           |                               |                   |
|------------|-------------------------------|-------------------------------|-------------------|-------------------------------|-------------------------------|-------------------|-------------------------------|-------------------------------|-------------------|
|            | $\lambda_{\text{ex}}$ ,<br>nm | $\lambda_{\text{em}}$ ,<br>nm | $\Phi_{\text{F}}$ | $\lambda_{\text{ex}}$ ,<br>nm | $\lambda_{\text{em}}$ ,<br>nm | $\Phi_{\text{F}}$ | $\lambda_{\text{ex}}$ ,<br>nm | $\lambda_{\text{em}}$ ,<br>nm | $\Phi_{\text{F}}$ |
| <b>B1</b>  | 259, 366*                     | 457                           | 0.13              | 257, 364*                     | 453                           | 0.29              | 247, 364*                     | 459                           | 0.24              |
| <b>B2</b>  | 265, 366*                     | 443                           | 0.24              | 260, 368*                     | 455                           | 0.10              | 259, 367*                     | 457                           | 0.10              |
| <b>B3</b>  | 260, 365*                     | 444                           | 0.25              | 260, 365*                     | 454                           | 0.29              | 258, 365*                     | 455                           | 0.27              |
| <b>B4</b>  | 260, 364*                     | 444                           | 0.21              | 256, 364*                     | 454                           | 0.28              | 258, 364*                     | 455                           | 0.23              |
| <b>B5</b>  | 257, 366*                     | 442                           | 0.15              | 256, 364*                     | 450                           | 0.29              | 256, 364*                     | 453                           | 0.11              |
| <b>B6</b>  | 259, 362*                     | 437                           | 0.22              | 261, 362*                     | 449                           | 0.42              | 257, 360*                     | 450                           | 0.25              |
| <b>B7</b>  | 260, 362*                     | 437                           | 0.24              | 261, 359*                     | 446                           | 0.38              | 256, 360*                     | 448                           | 0.21              |
| <b>B8</b>  | 260, 365*                     | 442                           | 0.019             | 262, 362*                     | 472                           | 0.005             | 262, 361*                     | 468                           | 0.004             |
| <b>B9</b>  | 272, 357*                     | 462                           | 0.002             | 278, 364*                     | 494                           | 0.002             | 274, 364*                     | 494                           | 0.001             |
| <b>B10</b> | 273, 362*                     | 483                           | 0.0025            | 275, 368*                     | 511                           | 0.001             | 275, 362*                     | 532                           | 0.0007            |

<sup>a</sup>  $\lambda_{\text{ex}}$ : maximum fluorescence excitation wavelength;  $\lambda_{\text{em}}$ : maximum fluorescence emission wavelength;  $\Phi_{\text{F}}$ : fluorescence quantum yield; \* fluorescence excitation wavelength employed for obtaining the emission spectra.

### 3. Analytical reactions with compounds A6 and A8

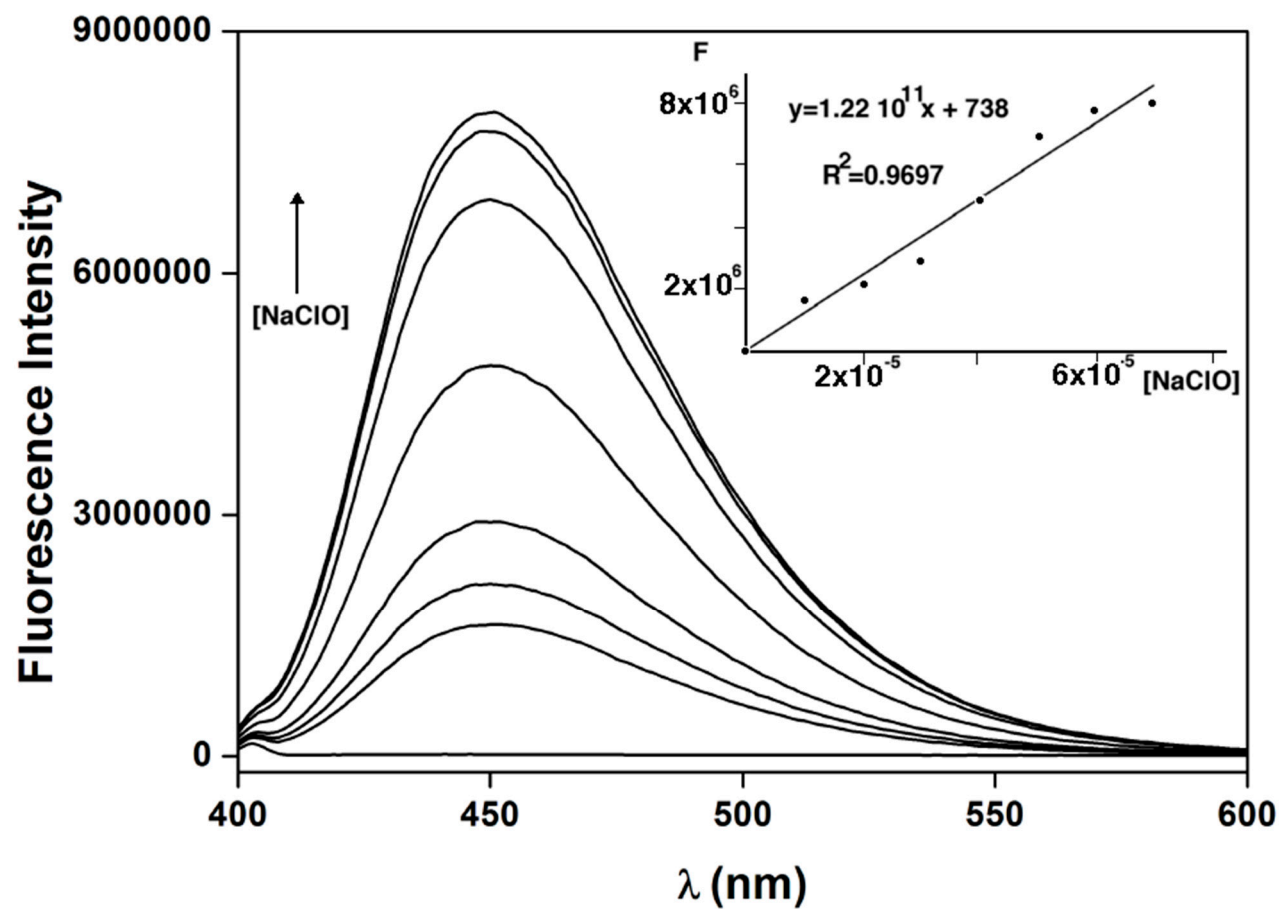

**Figure S.1** Fluorescence emission spectra ( $\lambda_{\text{ex}}$  360 nm) of the product obtained from the reaction of A6 with increasing amounts of sodium hypochlorite.

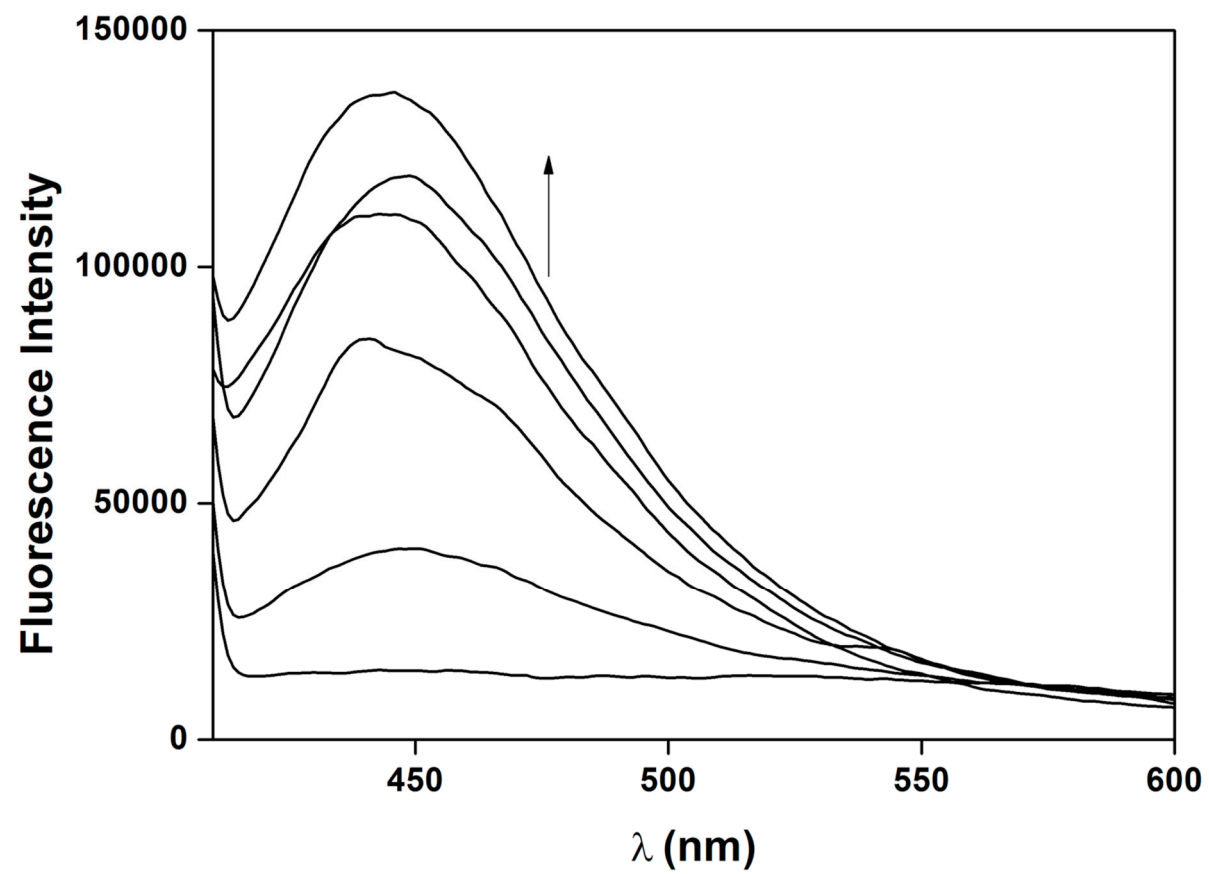

**Figure S.2** Fluorescence emission spectra ( $\lambda_{\text{ex}}$  360 nm) of the product obtained from the reaction of **A6** with increasing amounts of hydrogen peroxide.

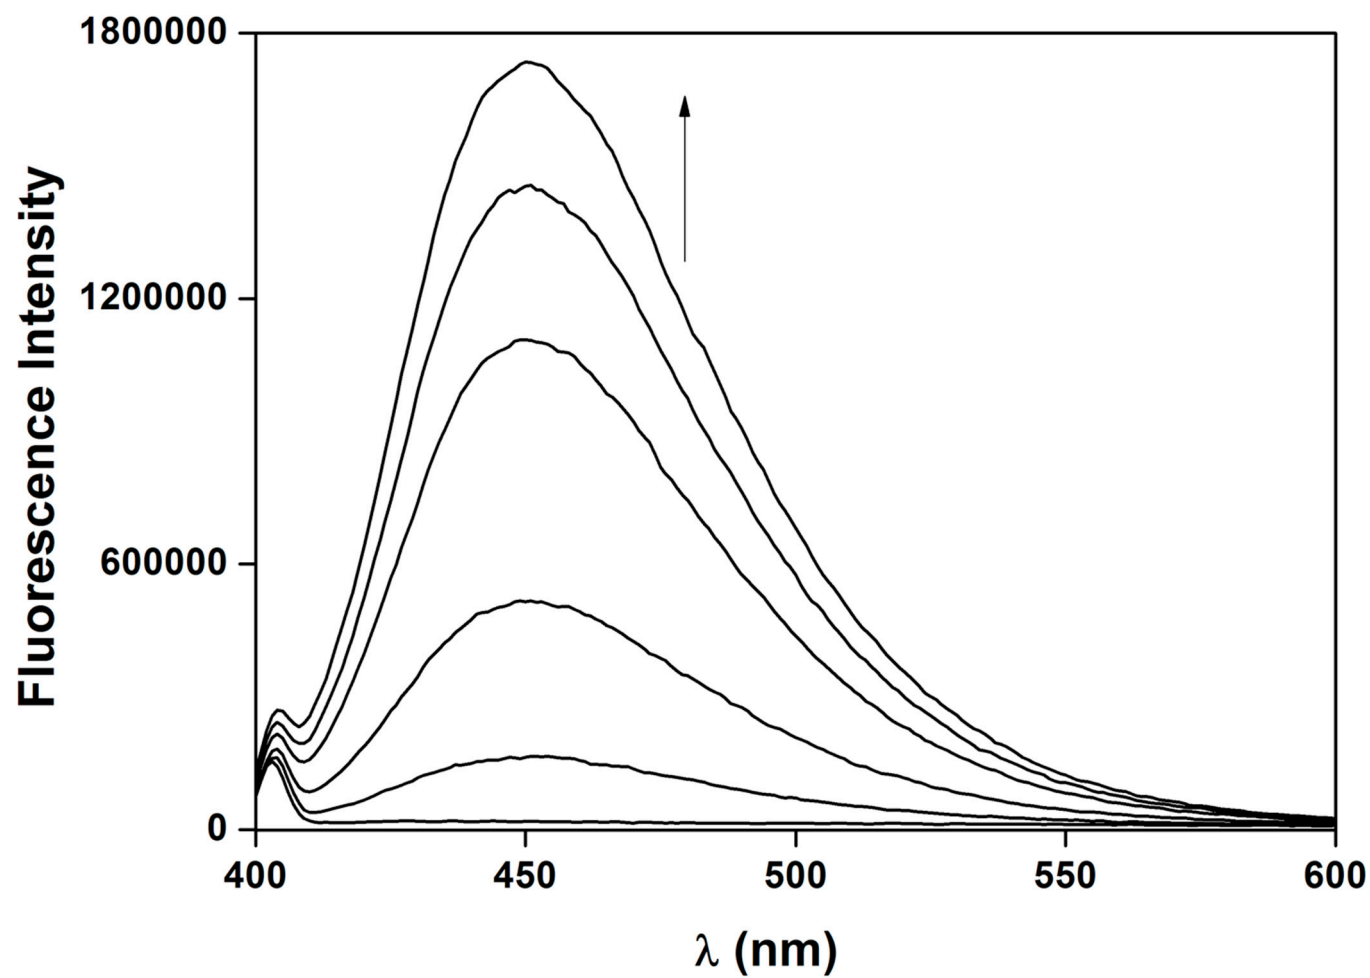

**Figure S.3** Fluorescence emission spectra ( $\lambda_{\text{ex}}$  360 nm) of the product obtained from the reaction of **A6** with increasing amounts of *tert*-butyl hydroperoxide

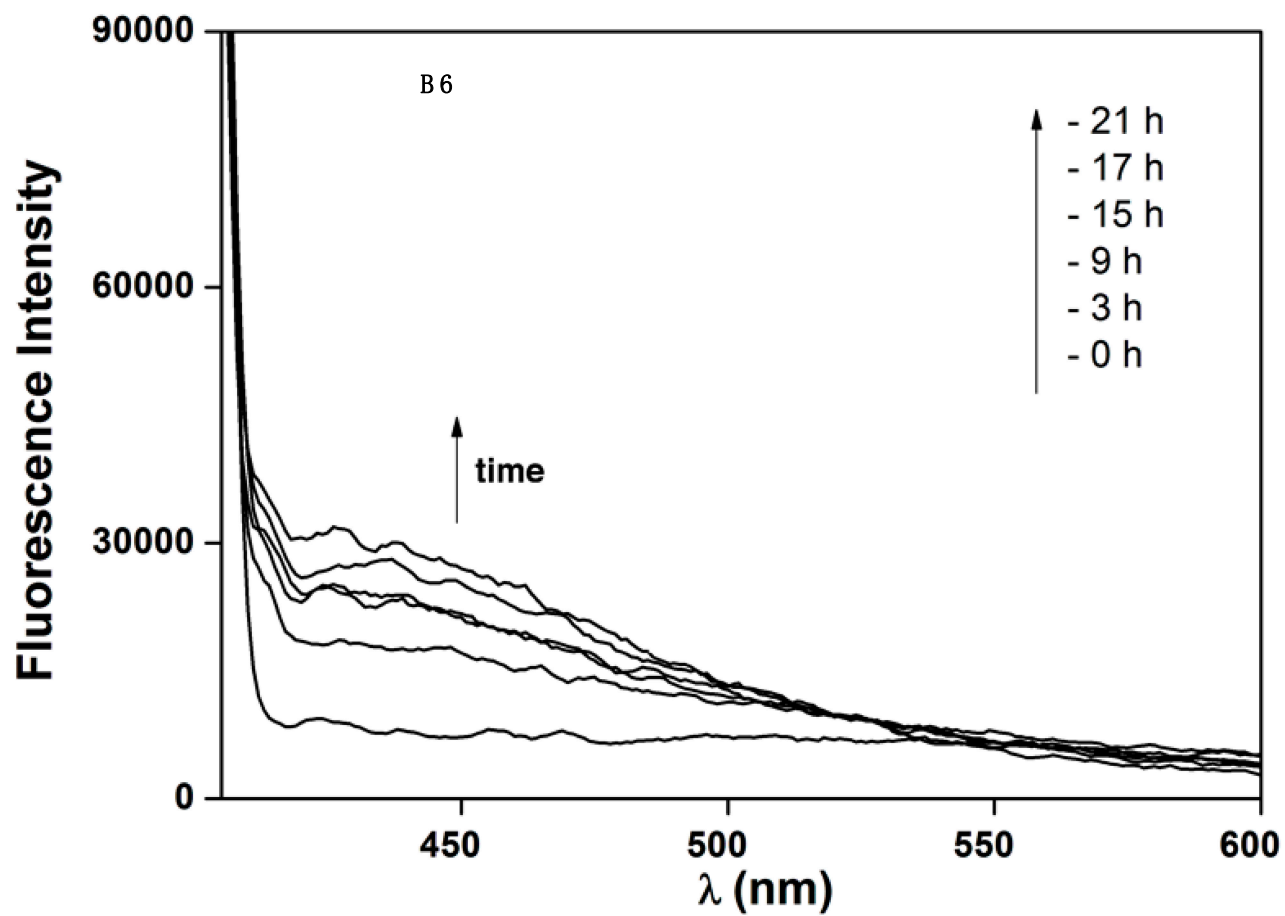

**Figure S.4** Fluorescence emission spectra ( $\lambda_{\text{ex}}$  361 nm) of the product obtained from the reaction of compound **A8** with the maximum amount of sodium hypochlorite employed for all other cases, after increasing the reaction time up to 21 h.
